# Supplementary material
Source: HighWire-hosted journal article supplement (https://erj.ersjournals.com/content/59/4/2101574)
Supplement: inline-supplementary-material-1 [file inline-supplementary-material-1.pdf]

## Supplement: Evidence Profiles

### ERS Guidelines: High flow nasal cannula in acute respiratory failure

#### Authors

Simon Oczkowski<sup>1,2,\*</sup>, Begüm Ergan<sup>3,\*</sup>, Lieuwe Bos<sup>4,5</sup>, Michelle Chatwin<sup>6</sup>, Miguel Ferrer<sup>7</sup>, Cesare Gregoretti<sup>8,9</sup>, Leo Heunks<sup>10</sup>, Jean-Pierre Frat<sup>11,12</sup>, Federico Longhini<sup>13</sup>, Stefano Nava<sup>14,15</sup>, Paolo Navalesi<sup>16,17</sup>, Aylin Ozsancak Ugurlu<sup>18</sup>, Lara Pisani<sup>14,15</sup>, Teresa Renda<sup>19</sup>, Arnaud W. Thille<sup>11,12</sup>, João Carlos Winck<sup>20</sup>, Wolfram Windisch<sup>21</sup>, Thomy Tonia<sup>22</sup>, Jeanette Boyd<sup>23</sup>, Giovanni Sotgiu<sup>24</sup>, Raffaele Scala<sup>25</sup>

#### \*co-first authors

#### Affiliations

1. Department of Medicine, Division of Critical Care, McMaster University, Hamilton, Ontario, Canada
2. Department of Health Research Methods, Evidence, and Impact, McMaster University, Hamilton, Ontario, Canada
3. Department of Pulmonary and Critical Care, Dokuz Eylul University School of Medicine, Izmir, Turkey
4. Department of Intensive Care & Laboratory of Experimental Intensive Care and Anesthesiology (LEICA), Amsterdam UMC, location Academic Medical Center, Amsterdam
5. Respiratory Medicine, Amsterdam UMC, location Academic Medical Center, Amsterdam, The Netherlands.
6. Academic and Clinical Department of Sleep and Breathing and NIHR Respiratory Biomedical Research Unit, Royal Brompton & Harefield NHS Foundation Trust, Sydney Street, London, UK.
7. Dept of Pneumology, Respiratory Institute, Hospital Clinic, IDIBAPS, University of Barcelona and CIBERES, Barcelona, Spain.
8. Department of Surgical, Oncological and Oral Science University of Palermo, Palermo, Italy.
9. G.Giglio Institute, Cefalu', Italy
10. Department of Intensive Care Medicine, Amsterdam UMC, Location VUmc, Amsterdam, The Netherlands
11. Centre Hospitalier Universitaire de Poitiers, Médecine Intensive Réanimation, Poitiers, France.
12. INSERM Centre d'Investigation Clinique 1402 ALIVE, Université de Poitiers, Poitiers, France.
13. Anesthesia and Intensive Care Unit, Department of Medical and Surgical Sciences, Magna Graecia University, Catanzaro, Italy
14. Alma Mater Studiorum University of Bologna, Dept of Clinical, Integrated and Experimental Medicine (DIMES), Bologna, Italy
15. IRCCS Azienda Ospedaliero-Universitaria di Bologna, University Hospital Sant'Orsola-Malpighi - Respiratory and Critical Care Unit, Bologna, Italy
16. Anesthesia and Intensive Care, Padua University Hospital, University Hospital, Padua, Italy
17. Department of Medicine -DIMED, University of Padua, Italy
18. Department of Pulmonary Medicine, Baskent University, Istanbul, Turkey.
19. Cardiothoracic and Vascular Department, Respiratory and Critical Care Unit, Careggi University Hospital, Largo Brambilla 3, 50134 Florence, Italy.
20. Faculdade de Medicina da Universidade do Porto, Portugal.
21. Cologne Merheim Hospital, Dept of Pneumology, Kliniken der Stadt Köln, gGmbH, Witten/Herdecke University, Faculty of Health/School of Medicine, Köln, Germany.
22. Institute of Social and Preventive Medicine, University of Bern, Switzerland
23. European Lung Foundation (ELF), Sheffield, United Kingdom
24. Clinical Epidemiology and Medical Statistics Unit, Department of Medical, Surgical, Experimental Sciences, University of Sassari, Sassari, Italy.
25. Pulmonology and Respiratory Intensive Care Unit, Cardio-Thoraco-Neuro-vascular and Metabolic Department, Usl Toscana Sudest, S Donato Hospital, Arezzo, Italy.

### **Recommendation 1: High flow nasal cannula (HFNC) vs conventional oxygen therapy (COT) in hypoxemic respiratory failure**

| Certainty assessment                 |              |               |              |                      |                      | № of patients   |                 | Effect                 |                                                  | Certainty                                     | Importance |
|--------------------------------------|--------------|---------------|--------------|----------------------|----------------------|-----------------|-----------------|------------------------|--------------------------------------------------|-----------------------------------------------|------------|
| № of studies                         | Risk of bias | Inconsistency | Indirectness | Imprecision          | Other considerations | HFNC            | COT             | Relative (95% CI)      | Absolute (95% CI)                                |                                               |            |
| Mortality (90 day)                   |              |               |              |                      |                      |                 |                 |                        |                                                  |                                               |            |
| 4 RCTs                               | not serious  | not serious   | not serious  | serious <sup>a</sup> | none                 | 208/659 (31.6%) | 208/620 (33.5%) | RR 0.97 (0.83 to 1.13) | 10 fewer per 1,000 (from 57 fewer to 44 more)    | <div><div>⊕⊕⊕○</div><div>MODERATE</div></div> | CRITICAL   |
| Mortality (ICU, hospital, or 28 day) |              |               |              |                      |                      |                 |                 |                        |                                                  |                                               |            |
| 6 RCTs                               | not serious  | not serious   | not serious  | serious <sup>a</sup> | none                 | 189/773 (24.5%) | 187/734 (25.5%) | RR 0.99 (0.84 to 1.17) | 3 fewer per 1,000 (from 41 fewer to 43 more)     | <div><div>⊕⊕⊕○</div><div>MODERATE</div></div> | CRITICAL   |
| Intubation                           |              |               |              |                      |                      |                 |                 |                        |                                                  |                                               |            |
| 11 RCTs                              | not serious  | not serious   | not serious  | serious <sup>a</sup> | none                 | 231/943 (24.5%) | 253/907 (27.9%) | RR 0.89 (0.77 to 1.02) | 31 fewer per 1,000 (from 64 fewer to 6 more)     | <div><div>⊕⊕⊕○</div><div>MODERATE</div></div> | CRITICAL   |
| Escalation to NIV                    |              |               |              |                      |                      |                 |                 |                        |                                                  |                                               |            |
| 6 RCTs                               | not serious  | not serious   | not serious  | serious <sup>a</sup> | none                 | 38/409 (9.3%)   | 47/388 (12.1%)  | RR 0.76 (0.43 to 1.34) | 29 fewer per 1,000 (from 69 fewer to 41 more)    | <div><div>⊕⊕⊕○</div><div>MODERATE</div></div> | CRITICAL   |
| Hospital length of stay              |              |               |              |                      |                      |                 |                 |                        |                                                  |                                               |            |
| 5 RCTs                               | not serious  | not serious   | not serious  | serious <sup>a</sup> | none                 | 683             | 660             | -                      | MD 0.72 days lower (1.54 lower to 0.1 higher)    | <div><div>⊕⊕⊕○</div><div>MODERATE</div></div> | IMPORTANT  |
| ICU length of stay                   |              |               |              |                      |                      |                 |                 |                        |                                                  |                                               |            |
| 2 RCTs                               | not serious  | not serious   | not serious  | serious <sup>b</sup> | none                 | 494             | 482             | -                      | MD 1.97 days higher (1.02 higher to 2.93 higher) | <div><div>⊕⊕⊕○</div><div>MODERATE</div></div> | IMPORTANT  |
| Patient comfort                      |              |               |              |                      |                      |                 |                 |                        |                                                  |                                               |            |
| 6 RCTs                               | not serious  | not serious   | not serious  | not serious          | none                 | 303             | 293             | -                      | SMD 0.54 lower (0.86 lower to 0.23 lower)        | <div><div>⊕⊕⊕⊕</div><div>HIGH</div></div>     | IMPORTANT  |
| Dyspnea                              |              |               |              |                      |                      |                 |                 |                        |                                                  |                                               |            |

### Recommendation 1: High flow nasal cannula (HFNC) vs conventional oxygen therapy (COT) in hypoxemic respiratory failure

|                                        |             |                      |                          |                      |      |     |     |   |                                                         |                  |           |
|----------------------------------------|-------------|----------------------|--------------------------|----------------------|------|-----|-----|---|---------------------------------------------------------|------------------|-----------|
| 6 RCTs                                 | not serious | not serious          | not serious <sup>c</sup> | serious <sup>a</sup> | none | 173 | 189 | - | SMD <b>0.32 lower</b><br>(0.66 lower to 0.03 higher)    | ⊕⊕⊕○<br>MODERATE | IMPORTANT |
| <b>PaO<sub>2</sub>/FiO<sub>2</sub></b> |             |                      |                          |                      |      |     |     |   |                                                         |                  |           |
| 4 RCTs                                 | not serious | serious <sup>d</sup> | not serious              | serious <sup>a</sup> | none | 526 | 514 | - | MD <b>25.01 higher</b><br>(14.21 lower to 64.24 higher) | ⊕⊕○○<br>LOW      | IMPORTANT |
| <b>PaO<sub>2</sub></b>                 |             |                      |                          |                      |      |     |     |   |                                                         |                  |           |
| 6 RCTs                                 | not serious | not serious          | not serious              | not serious          | none | 202 | 193 | - | MD <b>16.72 higher</b><br>(5.74 higher to 27.71 higher) | ⊕⊕⊕⊕<br>HIGH     | IMPORTANT |
| <b>PCO<sub>2</sub></b>                 |             |                      |                          |                      |      |     |     |   |                                                         |                  |           |
| 6 RCTs                                 | not serious | not serious          | not serious              | not serious          | none | 202 | 193 | - | MD <b>0.01 higher</b><br>(1.17 lower to 1.2 higher)     | ⊕⊕⊕⊕<br>HIGH     | IMPORTANT |
| <b>Respiratory rate</b>                |             |                      |                          |                      |      |     |     |   |                                                         |                  |           |
| 10 RCTs                                | not serious | not serious          | not serious              | not serious          | none | 713 | 716 | - | MD <b>2.25 lower</b><br>(3.24 lower to 1.25 lower)      | ⊕⊕⊕⊕<br>HIGH     | IMPORTANT |

CI: Confidence interval; RR: Risk ratio; MD: Mean difference; SMD: Standardised mean difference

#### Explanations

a. Significant imprecision which does not rule out clinically significant benefit nor harm.

b. Though Azoulay 2018 demonstrates statistically significant increase in ICU length of stay, when estimated means and SD are used, they are not statistically significant when median (IQR) are compared.

c. Most studies used the validated Borg dyspnea scale.

d. Very significant heterogeneity between the Frat 2015 RCT and the other trials (I<sup>2</sup>= 93%) of likely clinical significance.

## Recommendation 1: High flow nasal cannula (HFNC) vs conventional oxygen therapy (COT) in hypoxemic respiratory failure

### 1. Mortality (90 day)

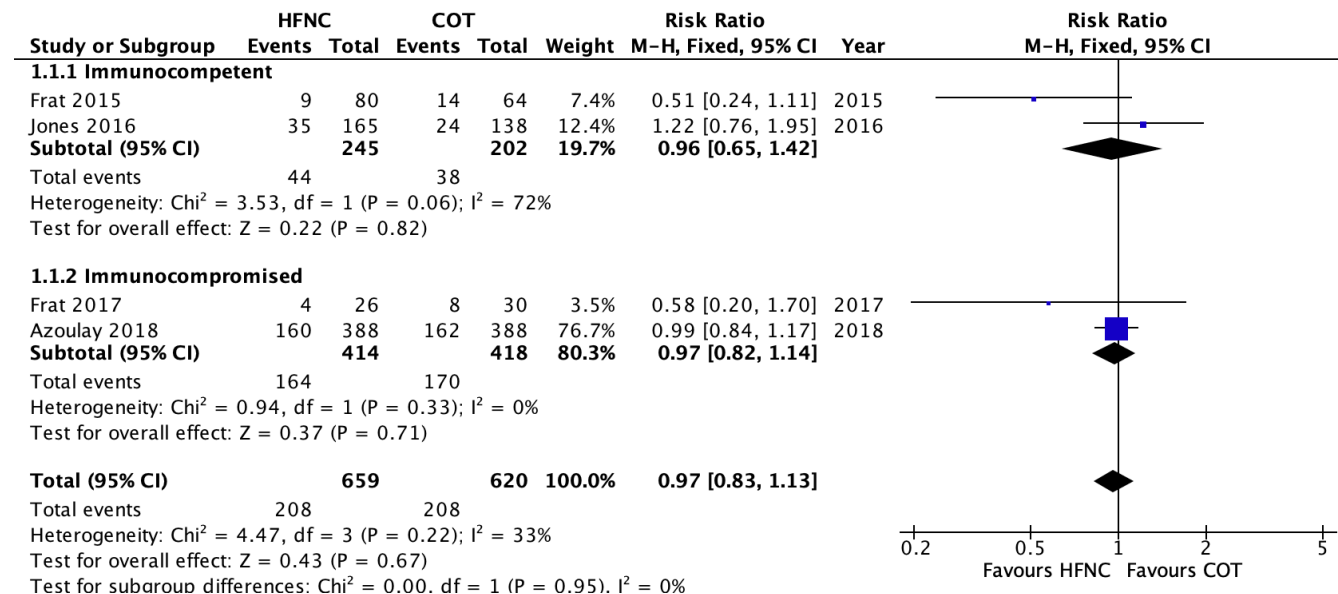

### 2. Mortality (early - ICU, hospital, or 28 day)

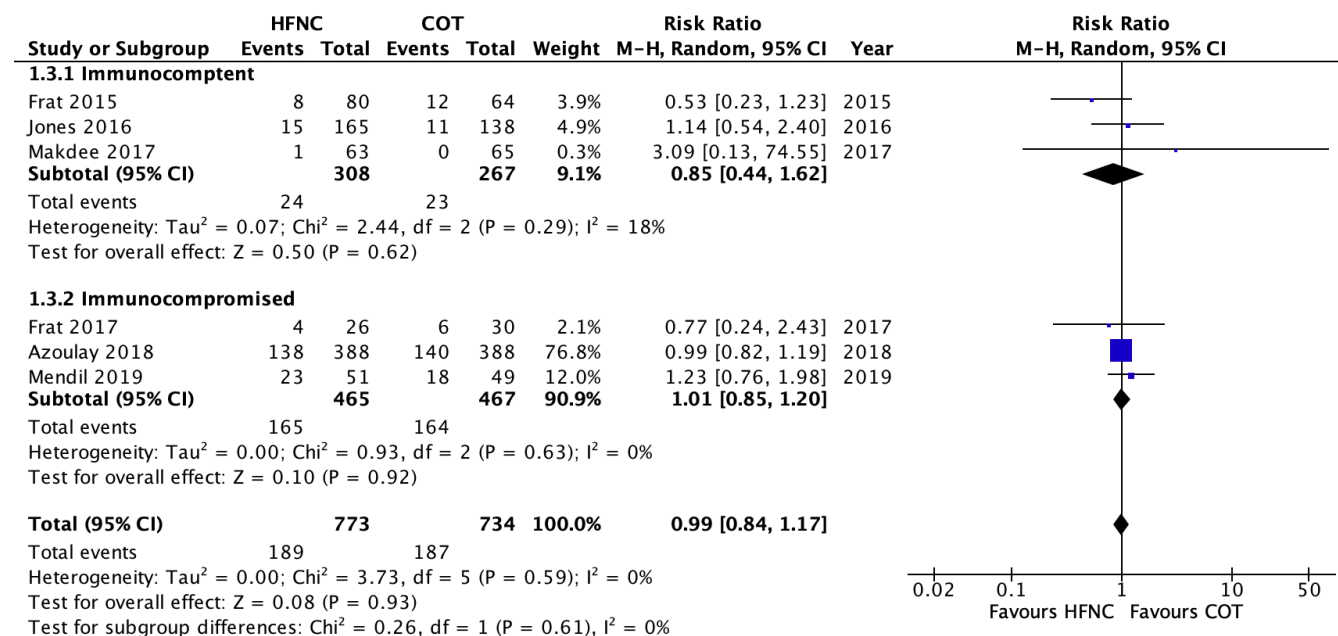

## Recommendation 1: High flow nasal cannula (HFNC) vs conventional oxygen therapy (COT) in hypoxemic respiratory failure

### 3. Intubation

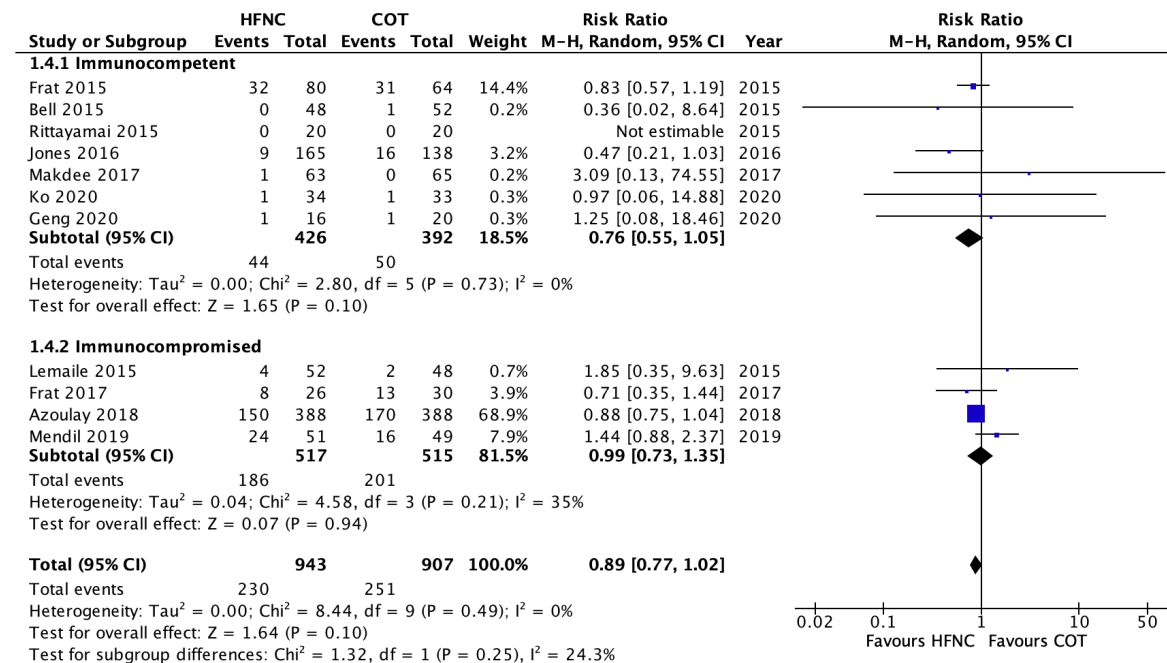

### 4. Escalation to NIV

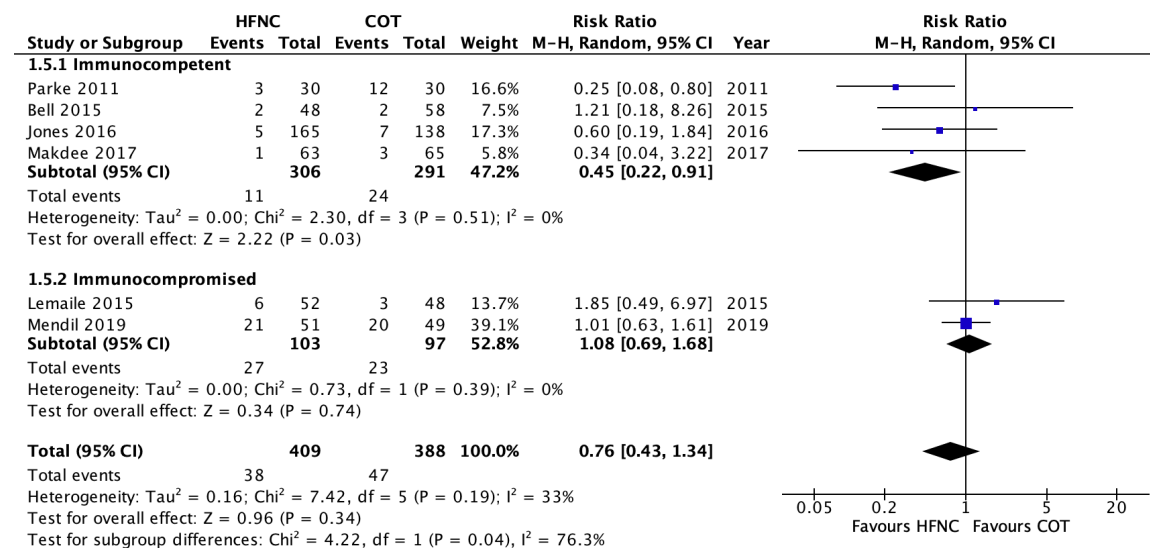

## Recommendation 1: High flow nasal cannula (HFNC) vs conventional oxygen therapy (COT) in hypoxemic respiratory failure

### 5. Hospital length of stay

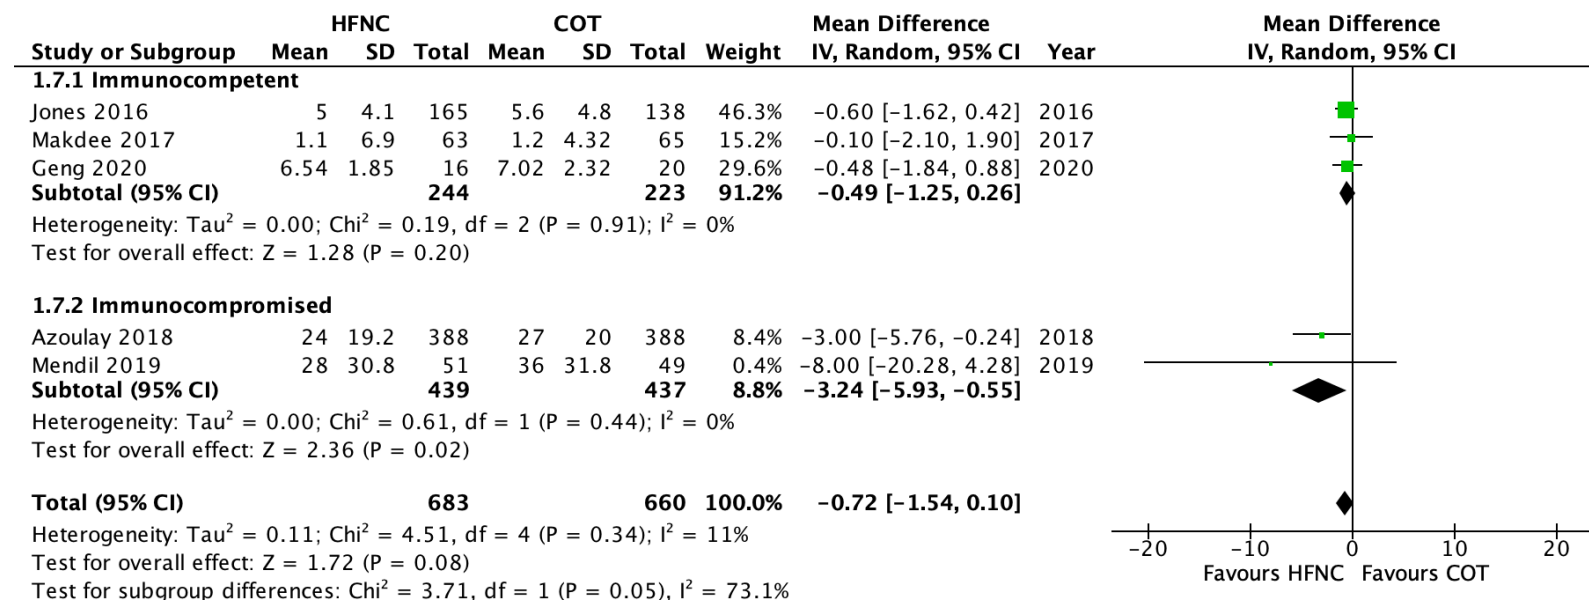

### 6. ICU length of stay

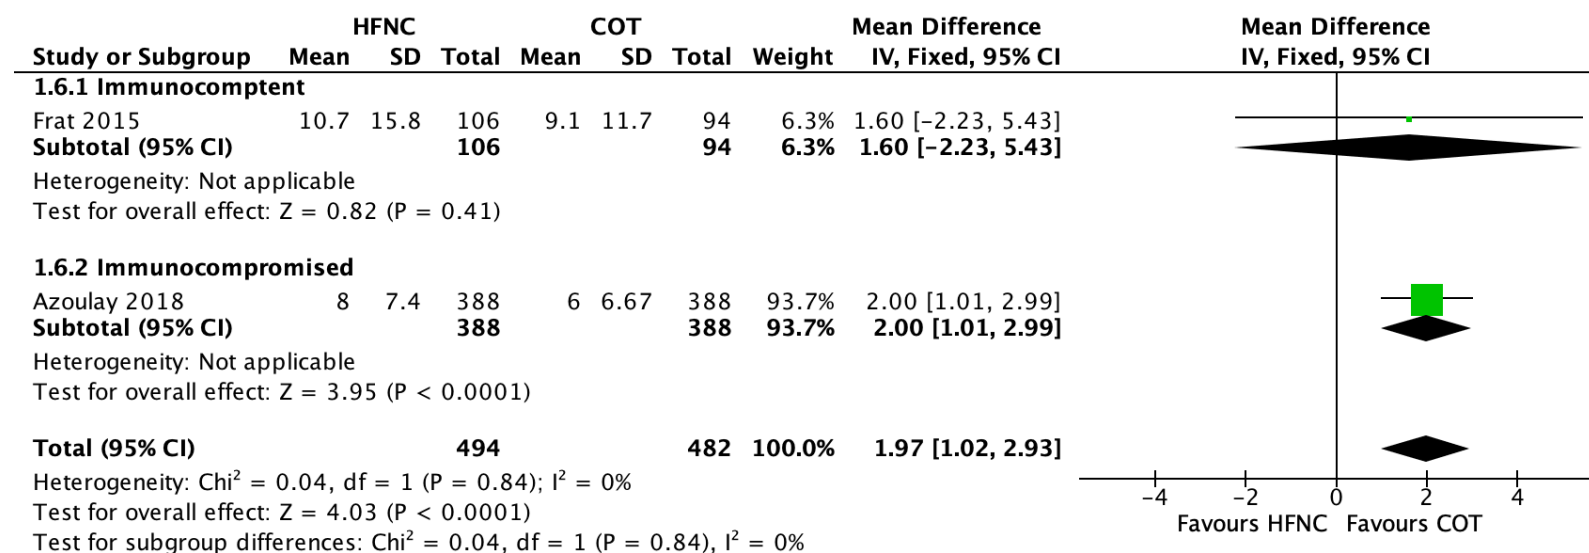

## Recommendation 1: High flow nasal cannula (HFNC) vs conventional oxygen therapy (COT) in hypoxemic respiratory failure

### 7. Patient comfort (various rating systems)

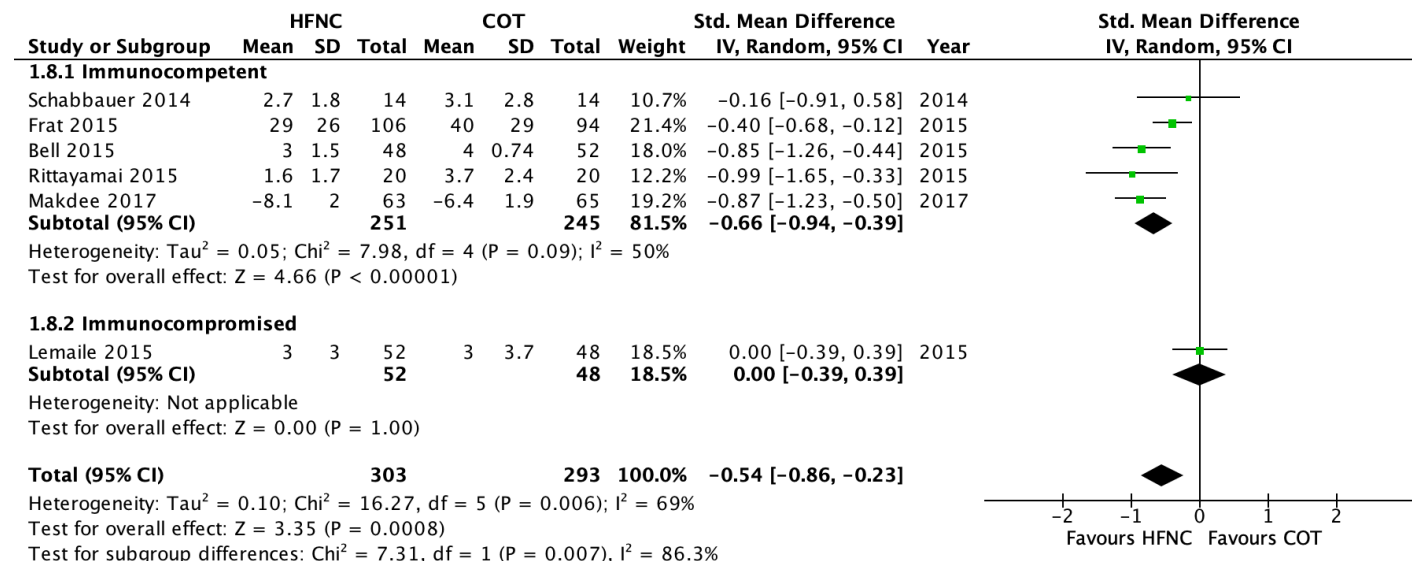

### 8. Dyspnea (various measures, Borg Dyspnea Scale or visual analog scale)

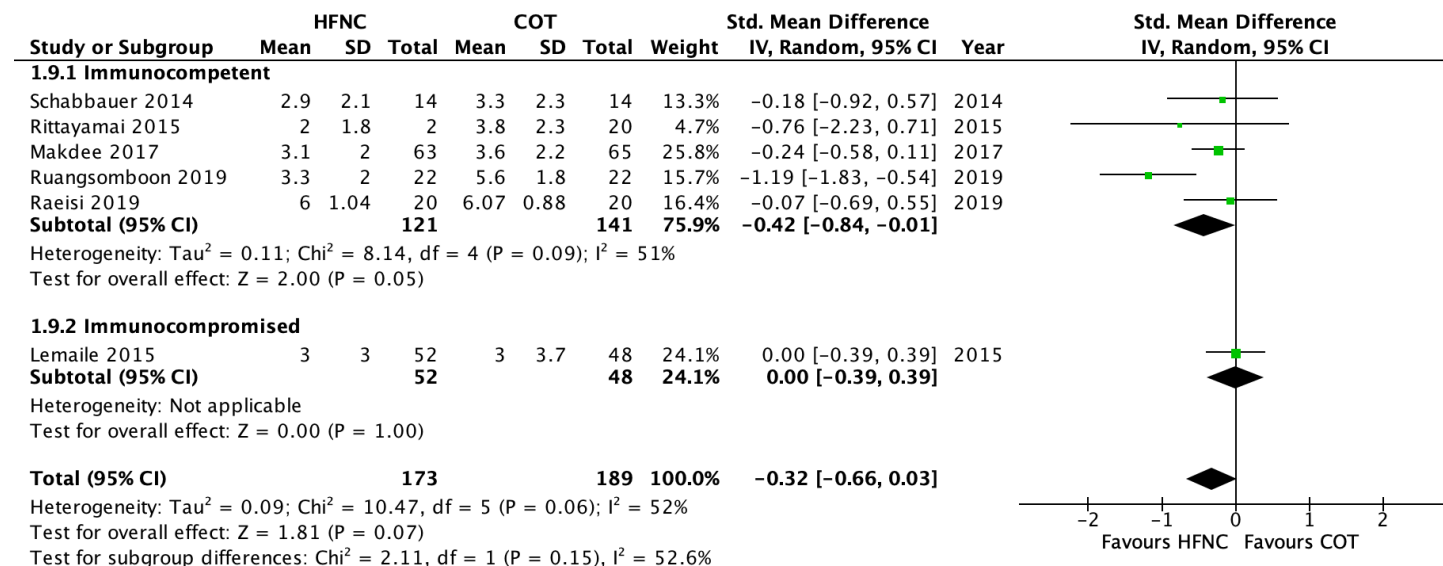

## Recommendation 1: High flow nasal cannula (HFNC) vs conventional oxygen therapy (COT) in hypoxemic respiratory failure

### 9. PaO<sub>2</sub>:FiO<sub>2</sub>

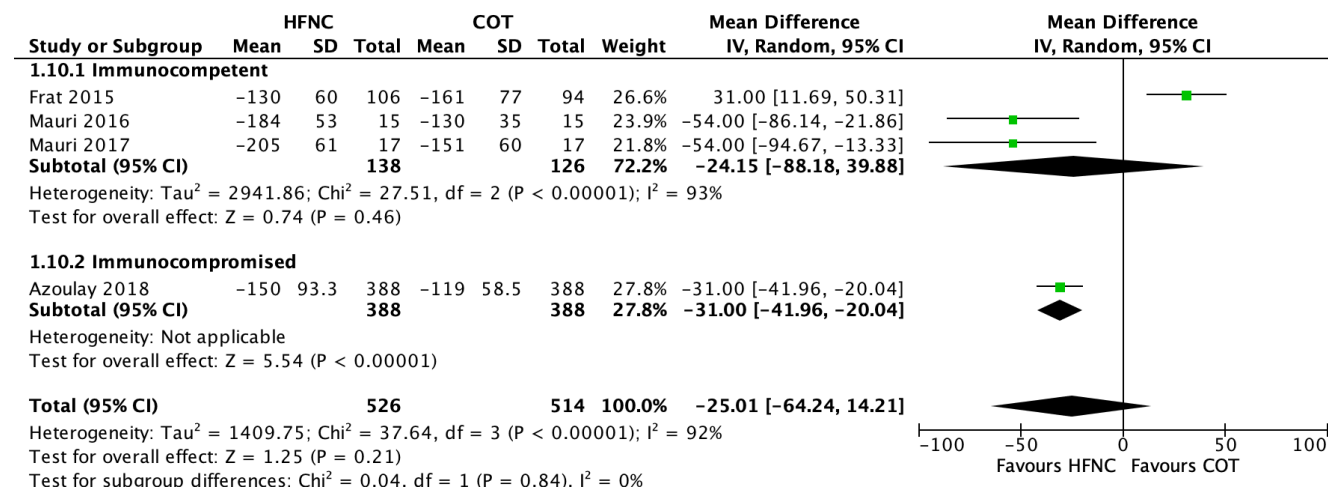

### 10. PaO<sub>2</sub>

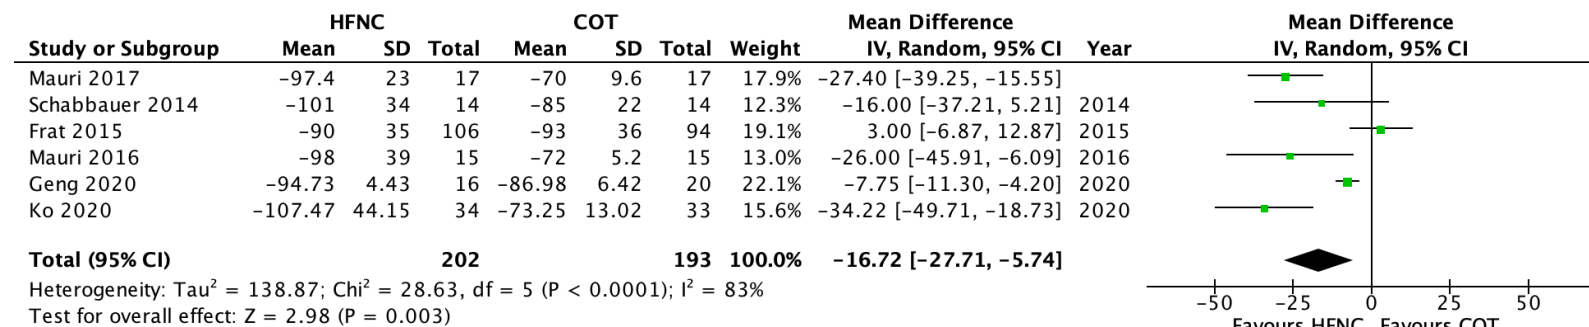



## Recommendation 1: High flow nasal cannula (HFNC) vs conventional oxygen therapy (COT) in hypoxemic respiratory failure

### 11. PCO<sub>2</sub> (most commonly PaCO<sub>2</sub>)

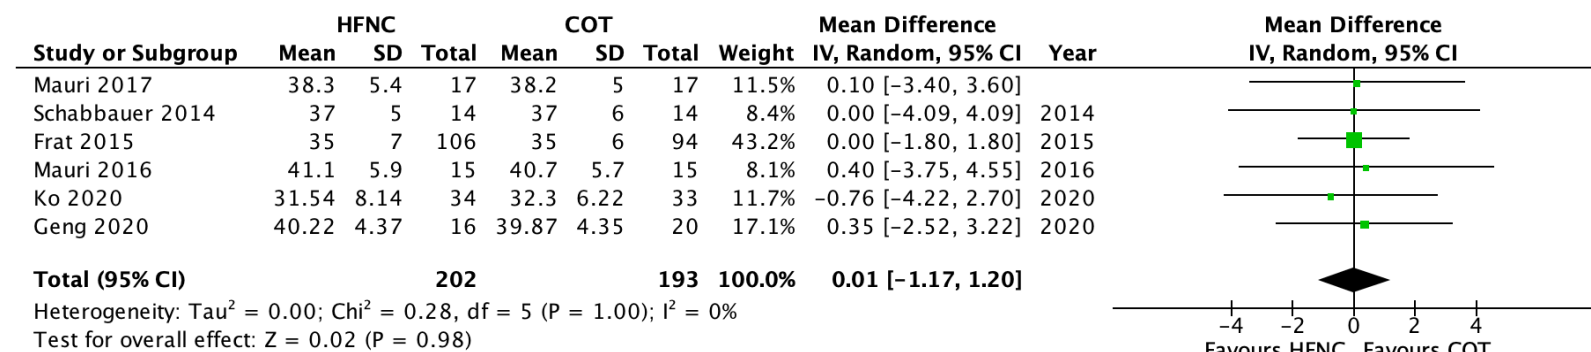

### 12. Respiratory rate

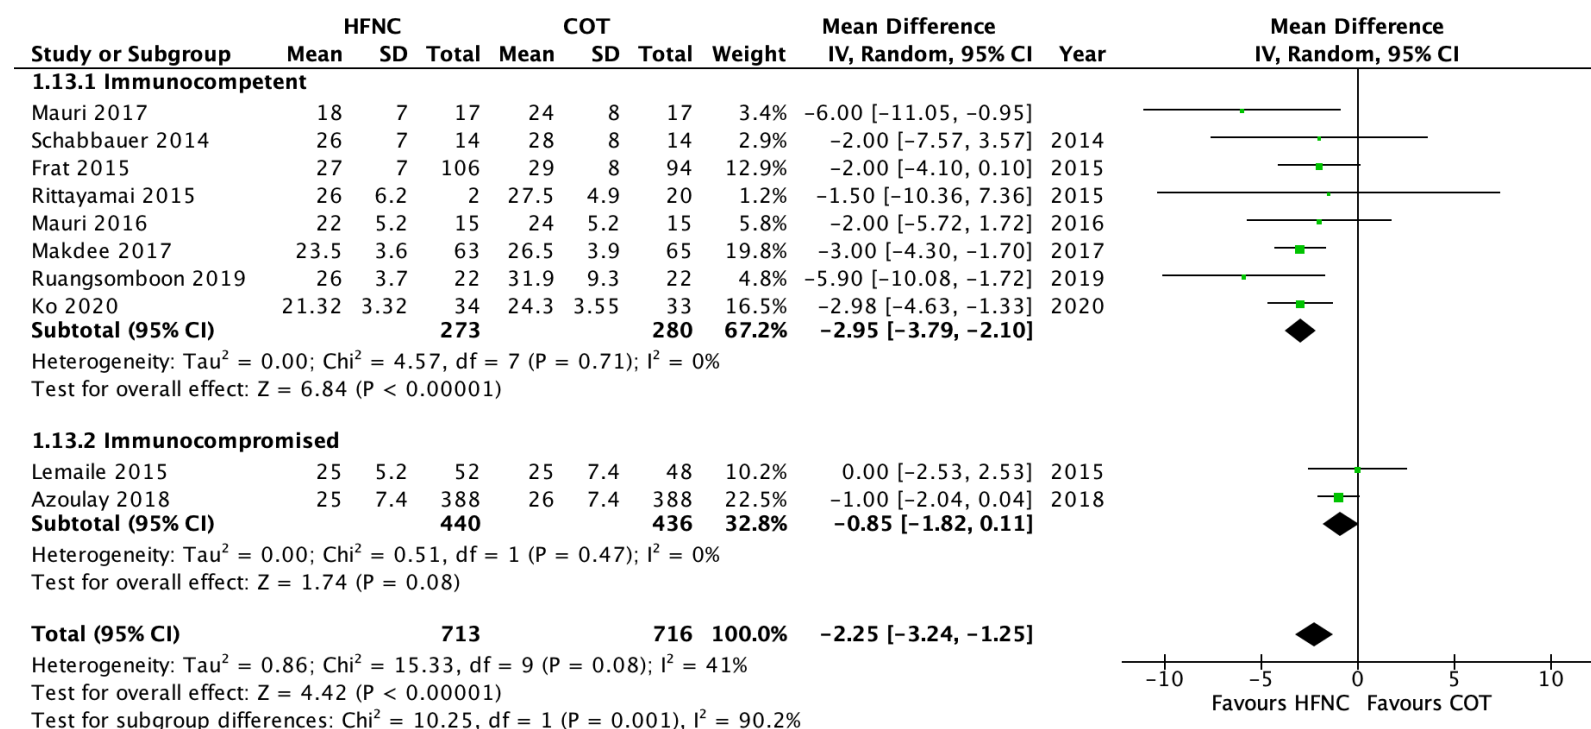

## Recommendation 2: High flow nasal cannula (HFNC) vs non-invasive ventilation (NIV) in hypoxemic respiratory failure

| Certainty assessment                |              |                           |                      |                           |                      | № of patients  |                | Effect                 |                                                  | Certainty                                     | Importance |
|-------------------------------------|--------------|---------------------------|----------------------|---------------------------|----------------------|----------------|----------------|------------------------|--------------------------------------------------|-----------------------------------------------|------------|
| № of studies                        | Risk of bias | Inconsistency             | Indirectness         | Imprecision               | Other considerations | HFNC           | NIV            | Relative (95% CI)      | Absolute (95% CI)                                |                                               |            |
| Mortality (90 day)                  |              |                           |                      |                           |                      |                |                |                        |                                                  |                                               |            |
| 1 RCT                               | not serious  | not serious               | serious <sup>a</sup> | serious <sup>b</sup>      | none                 | 13/106 (12.3%) | 31/110 (28.2%) | RR 0.43 (0.24 to 0.78) | 161 fewer per 1,000 (from 214 fewer to 62 fewer) | <div><div>⊕⊕○○</div><div>LOW</div></div>      | CRITICAL   |
| Mortality (ICU, hospital or 28 day) |              |                           |                      |                           |                      |                |                |                        |                                                  |                                               |            |
| 3 RCTs                              | not serious  | serious <sup>c</sup>      | serious <sup>a</sup> | serious <sup>d</sup>      | none                 | 35/234 (15.0%) | 47/240 (19.6%) | RR 0.77 (0.52 to 1.14) | 45 fewer per 1,000 (from 94 fewer to 27 more)    | <div><div>⊕○○○</div><div>VERY LOW</div></div> | CRITICAL   |
| Intubation                          |              |                           |                      |                           |                      |                |                |                        |                                                  |                                               |            |
| 5 RCTs                              | not serious  | not serious               | serious <sup>a</sup> | serious <sup>d</sup>      | none                 | 74/352 (21.0%) | 92/356 (25.8%) | RR 0.84 (0.61 to 1.16) | 41 fewer per 1,000 (from 101 fewer to 41 more)   | <div><div>⊕⊕○○</div><div>LOW</div></div>      | CRITICAL   |
| Hospital length of stay             |              |                           |                      |                           |                      |                |                |                        |                                                  |                                               |            |
| 1 RCTs                              | not serious  | not serious               | serious <sup>a</sup> | very serious <sup>e</sup> | none                 | 104            | 100            | -                      | MD 0.8 days higher (0.59 lower to 2.19 higher)   | <div><div>⊕○○○</div><div>VERY LOW</div></div> | IMPORTANT  |
| ICU length of stay                  |              |                           |                      |                           |                      |                |                |                        |                                                  |                                               |            |
| 2 RCTs                              | not serious  | not serious               | serious <sup>a</sup> | serious <sup>d</sup>      | none                 | 154            | 157            | -                      | MD 0.55 days lower (2 lower to 0.89 higher)      | <div><div>⊕⊕○○</div><div>LOW</div></div>      | IMPORTANT  |
| Patient comfort                     |              |                           |                      |                           |                      |                |                |                        |                                                  |                                               |            |
| 4 RCTs                              | not serious  | not serious               | serious <sup>a</sup> | not serious               | none                 | 207            | 208            | -                      | SMD 0.23 lower (0.55 lower to 0.09 higher )      | <div><div>⊕⊕⊕○</div><div>MODERATE</div></div> | IMPORTANT  |
| Dyspnea                             |              |                           |                      |                           |                      |                |                |                        |                                                  |                                               |            |
| 4 RCTs                              | not serious  | very serious <sup>f</sup> | serious <sup>a</sup> | serious <sup>g</sup>      | none                 | 193            | 194            | -                      | SMD 0.19 higher (0.01 lower to 0.40 higher)      | <div><div>⊕○○○</div><div>VERY LOW</div></div> | IMPORTANT  |

## Recommendation 2: High flow nasal cannula (HFNC) vs non-invasive ventilation (NIV) in hypoxemic respiratory failure

| PaO <sub>2</sub> /FiO <sub>2</sub> |             |                      |                      |             |      |     |     |   |                                                                 |                  |           |
|------------------------------------|-------------|----------------------|----------------------|-------------|------|-----|-----|---|-----------------------------------------------------------------|------------------|-----------|
| 3 RCTs                             | not serious | not serious          | serious <sup>a</sup> | not serious | none | 215 | 219 | - | MD 43.26 lower<br>(29.48 lower to 57.04 lower)                  | ⊕⊕⊕○<br>MODERATE | IMPORTANT |
| PaO <sub>2</sub>                   |             |                      |                      |             |      |     |     |   |                                                                 |                  |           |
| 4 RCTs                             | not serious | not serious          | serious <sup>a</sup> | not serious | none | 229 | 233 | - | MD 19.98 mmHg lower<br>(11.97 lower to 28 lower)                | ⊕⊕⊕○<br>MODERATE | IMPORTANT |
| PCO <sub>2</sub>                   |             |                      |                      |             |      |     |     |   |                                                                 |                  |           |
| 4 RCTs                             | not serious | serious <sup>c</sup> | serious <sup>a</sup> | not serious | none | 209 | 211 | - | MD 0.45 mmHg lower<br>(1.94 lower to 1.05 higher)               | ⊕⊕○○<br>LOW      | IMPORTANT |
| Respiratory rate                   |             |                      |                      |             |      |     |     |   |                                                                 |                  |           |
| 5 RCTs                             | not serious | serious <sup>c</sup> | serious <sup>a</sup> | not serious | none | 302 | 309 | - | MD 0.83 breaths per minute higher<br>(1.04 lower to 2.7 higher) | ⊕⊕○○<br>LOW      | IMPORTANT |

CI: Confidence interval; RR: Risk ratio; MD: Mean difference; SMD: Standardised mean difference

### Explanations

- Concerns were raised about the short duration of NIV in the study with the largest effects (Frat et al); as well NIV interfaces used (face mask vs. helmet) and use of humidification for secretion clearance during NIV varied between studies. As a result, we rated down for indirectness of the comparator.
- Optimal information size not met, assuming even a conservative relative risk reduction of 30%; thus we chose to rate down for imprecision, despite a statistically significant reduction in mortality.
- Substantial heterogeneity ( $I^2 > 40\%$ ) not easily explained by study characteristics.
- Wide 95% confidence intervals which do not exclude clinically meaningful benefit or harm.
- Very wide 95% confidence intervals which do not exclude clinically meaningful benefit or harm.
- Very substantial heterogeneity ( $I^2 > 80\%$ ) with two studies demonstrating opposite effects.
- We chose not to rate down for imprecision as this was accounted for in considering the very significant inconsistency between the included studies.

## Recommendation 2: High flow nasal cannula (HFNC) vs non-invasive ventilation (NIV) in hypoxemic respiratory failure

### 1. Mortality (90 day)

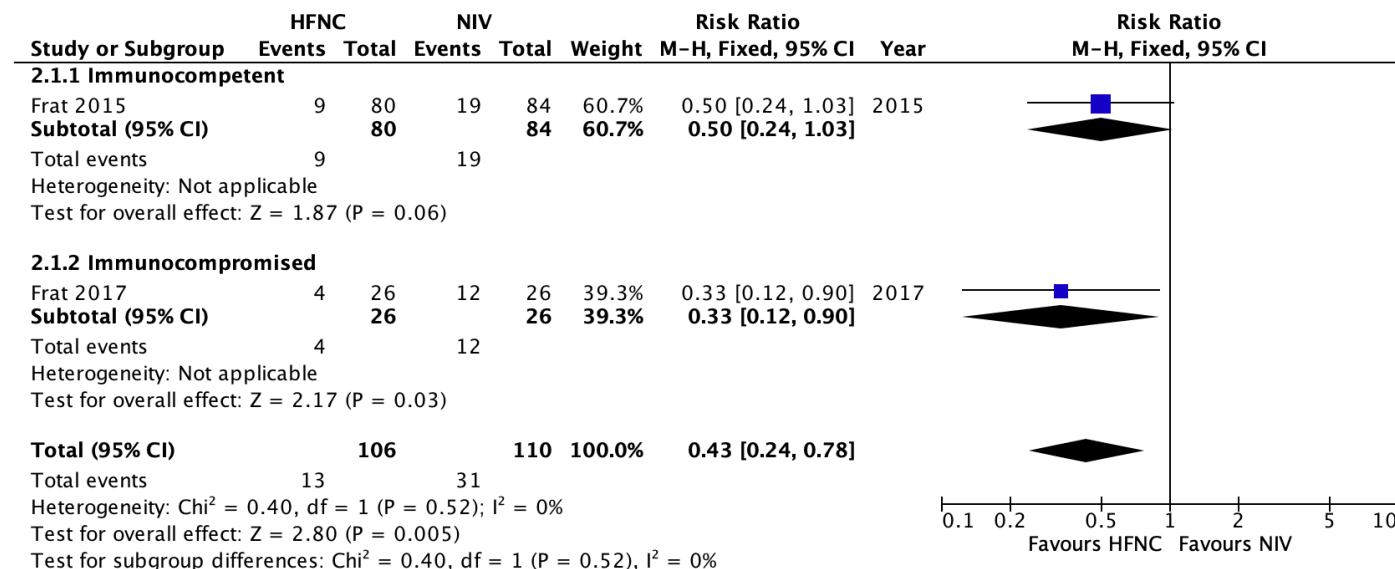

### 2. Mortality (early - ICU, hospital, or 28 day)

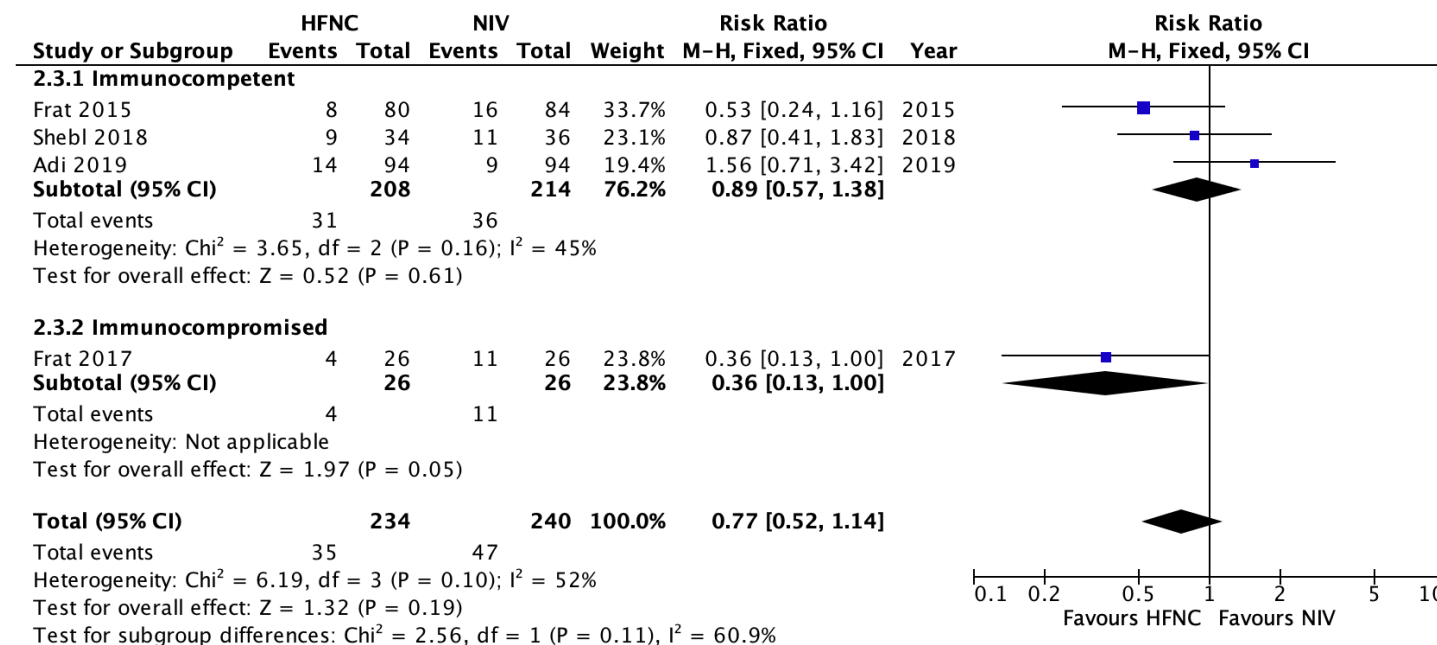

## Recommendation 2: High flow nasal cannula (HFNC) vs non-invasive ventilation (NIV) in hypoxemic respiratory failure

### 3. Intubation

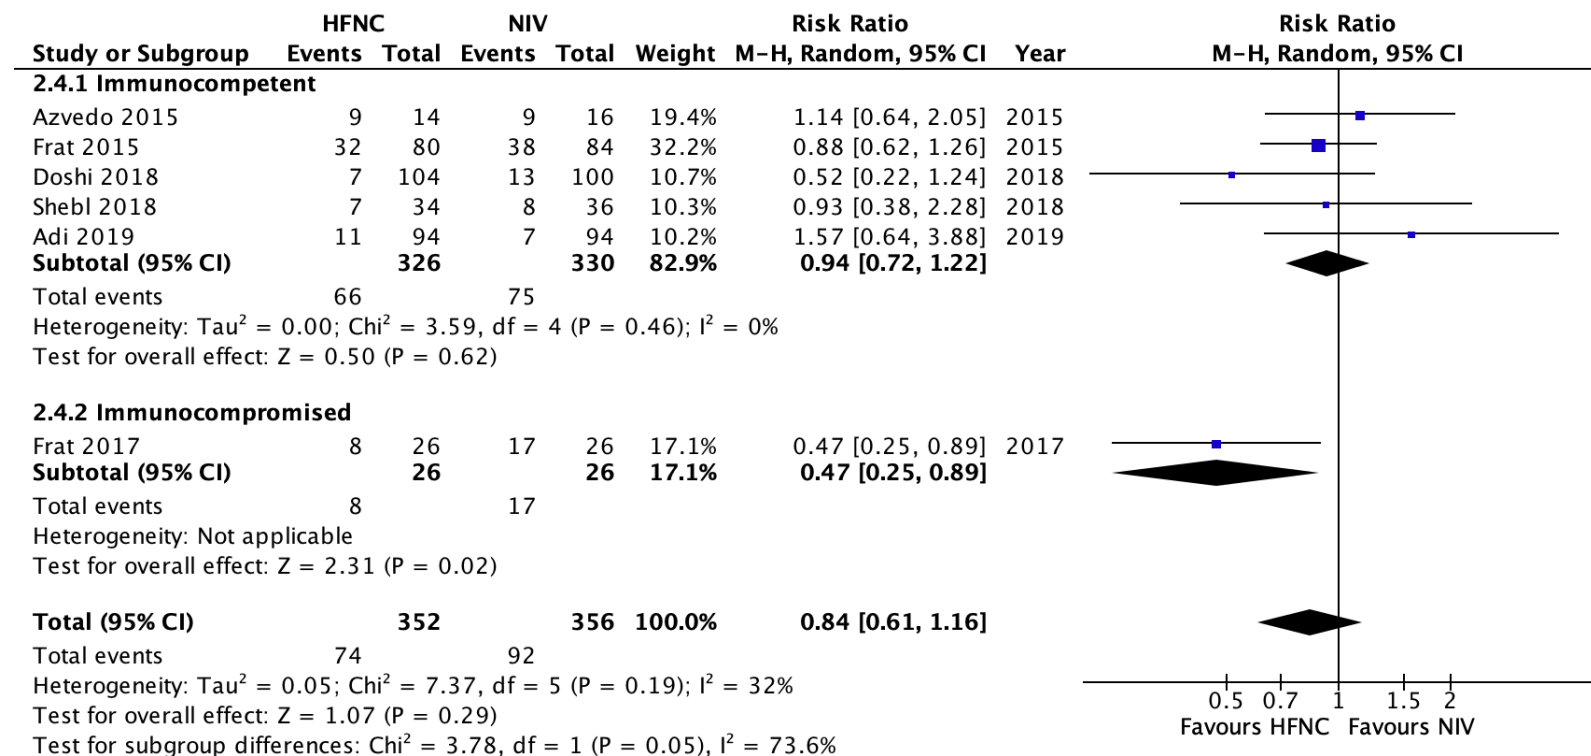

### 4. Hospital length of stay

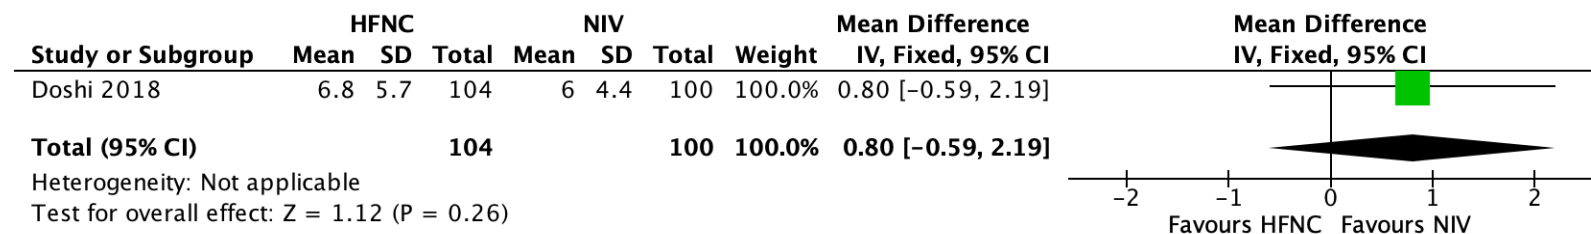

## Recommendation 2: High flow nasal cannula (HFNC) vs non-invasive ventilation (NIV) in hypoxemic respiratory failure

### 5. ICU length of stay

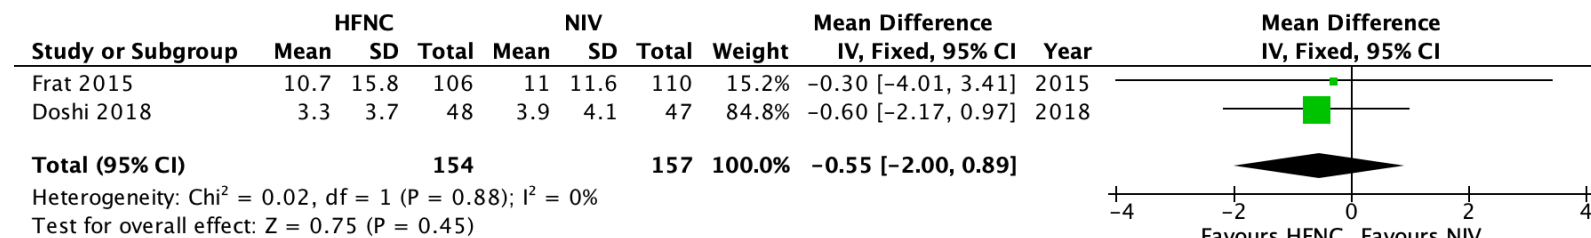

### 6. Patient comfort (various rating systems)

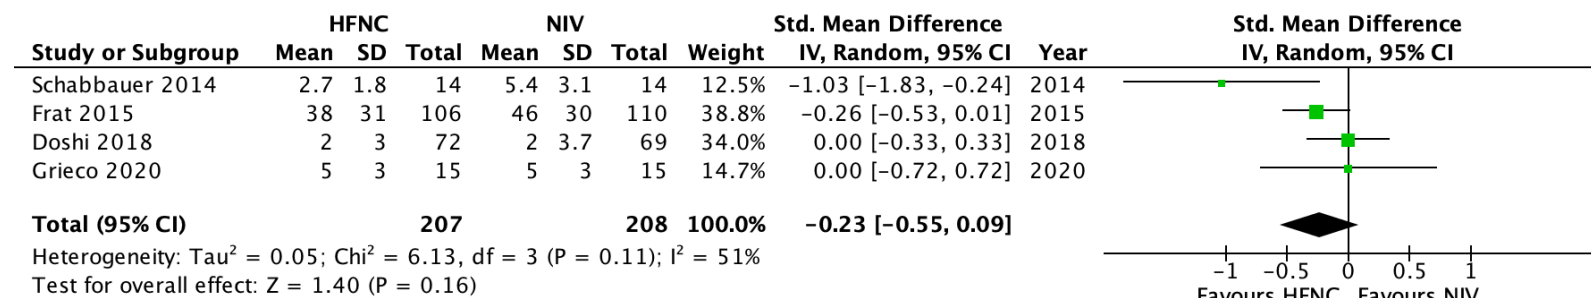

### 7. Dyspnea (various measures, Borg Dyspnea Scale or visual analog scale)

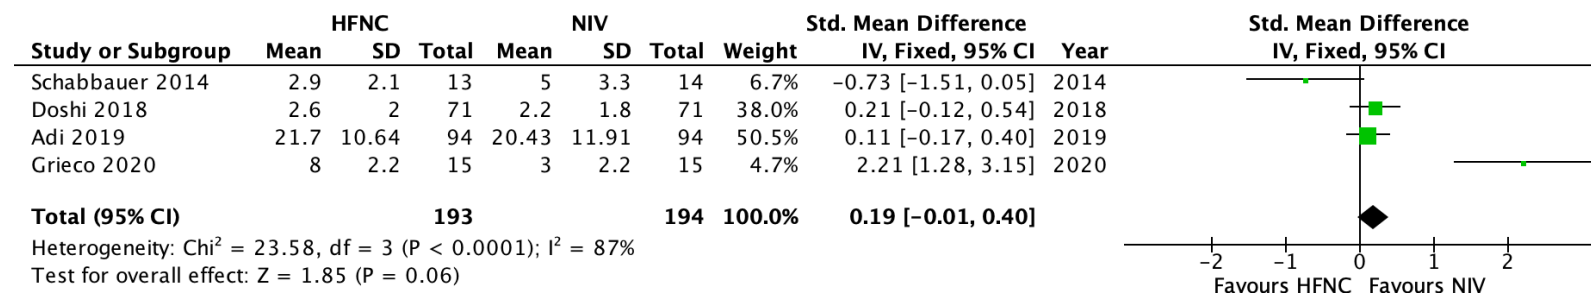

## Recommendation 2: High flow nasal cannula (HFNC) vs non-invasive ventilation (NIV) in hypoxemic respiratory failure

### 8. PaO<sub>2</sub>:FiO<sub>2</sub>

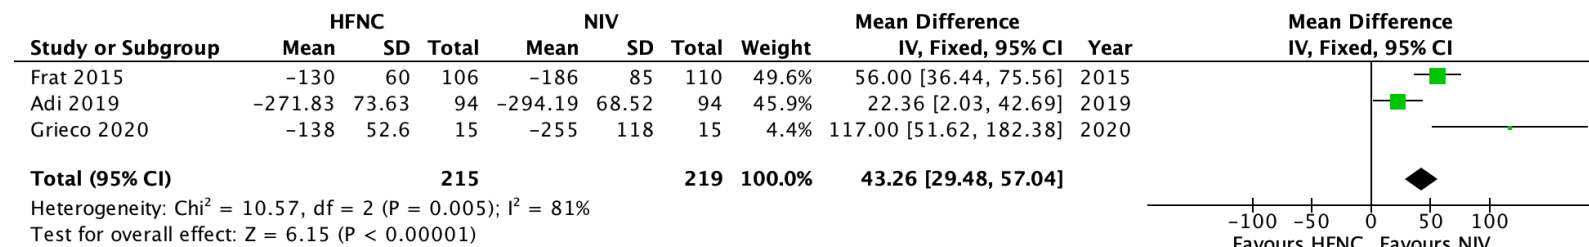

### 9. PaO<sub>2</sub>

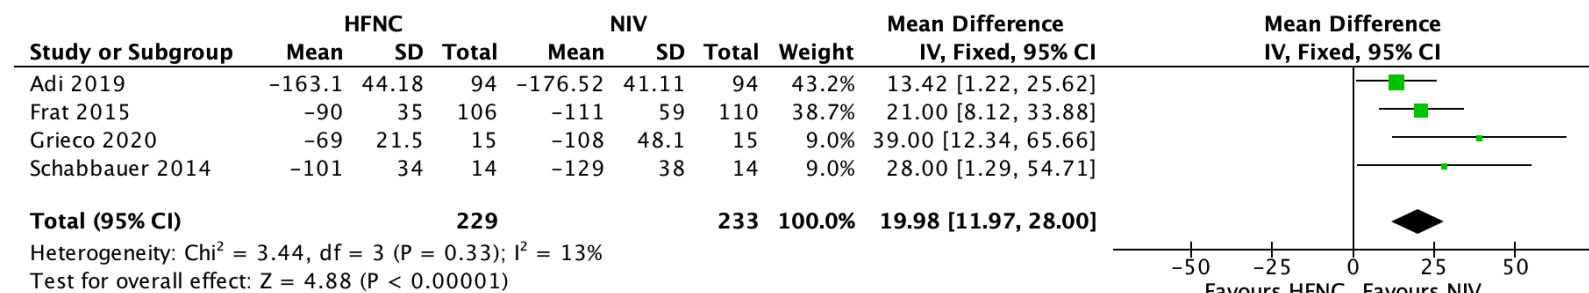

### 10. PCO<sub>2</sub> (most commonly PaCO<sub>2</sub>)

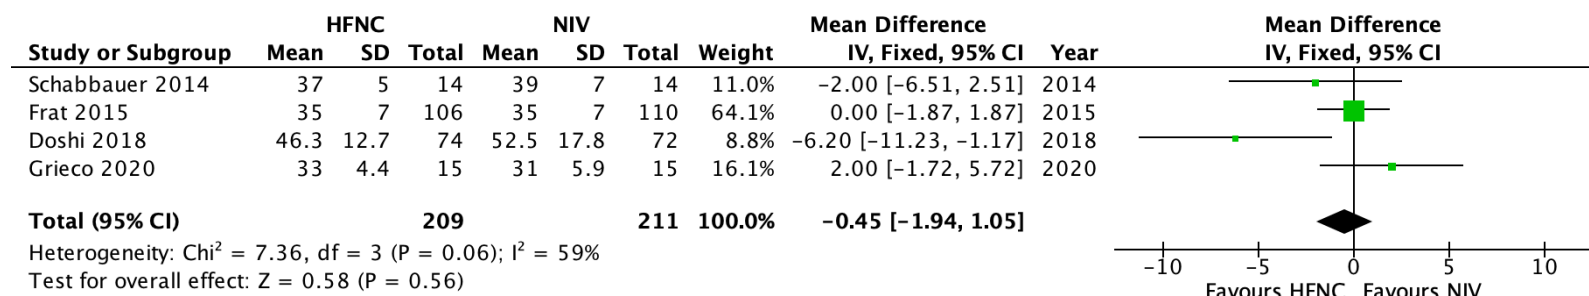

## Recommendation 2: High flow nasal cannula (HFNC) vs non-invasive ventilation (NIV) in hypoxemic respiratory failure

### 11. Respiratory rate

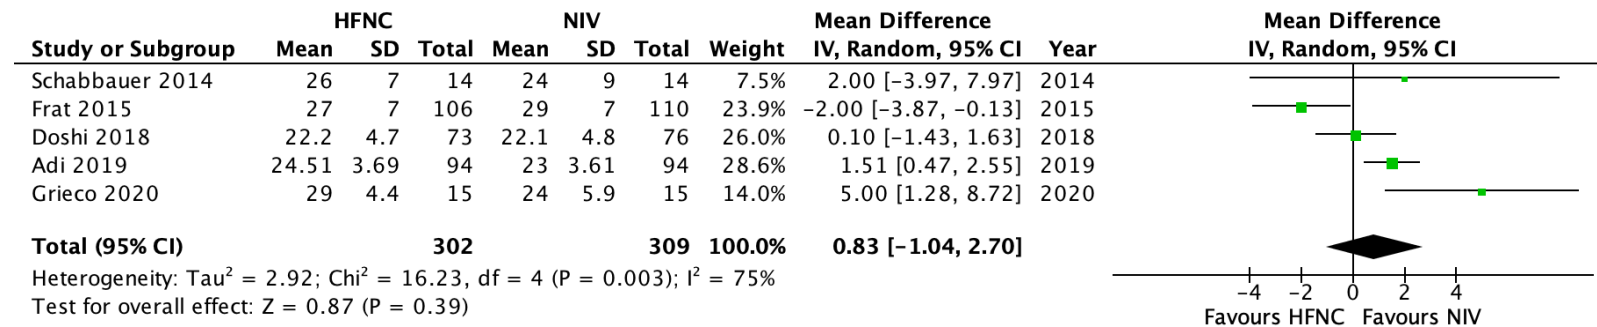



#### **Recommendation 4: High-flow nasal cannula (HFNC) vs. conventional oxygen therapy (COT) in post-operative patients**

| Certainty assessment              |                      |                           |              |                          |       | № of patients |                | Effect                 |                                               | Certainty                                     | Importance |
|-----------------------------------|----------------------|---------------------------|--------------|--------------------------|-------|---------------|----------------|------------------------|-----------------------------------------------|-----------------------------------------------|------------|
| № of studies                      | Risk of bias         | Inconsistency             | Indirectness | Imprecision              | Other | HFNC          | COT            | Relative (95% CI)      | Absolute (95% CI)                             |                                               |            |
| Mortality - Post-operative        |                      |                           |              |                          |       |               |                |                        |                                               |                                               |            |
| 7 RCTs                            | not serious          | not serious               | not serious  | serious <sup>a</sup>     | none  | 4/526 (0.8%)  | 7/523 (1.3%)   | RR 0.64 (0.19 to 2.14) | 5 fewer per 1,000 (from 11 fewer to 15 more)  | <div><div>⊕⊕⊕○</div><div>MODERATE</div></div> | CRITICAL   |
| Re-intubation - Post-operative    |                      |                           |              |                          |       |               |                |                        |                                               |                                               |            |
| 8 RCTs                            | serious <sup>b</sup> | not serious               | not serious  | serious <sup>a</sup>     | none  | 14/609 (2.3%) | 22/601 (3.7%)  | RR 0.66 (0.23 to 1.91) | 12 fewer per 1,000 (from 28 fewer to 33 more) | <div><div>⊕⊕○○</div><div>LOW</div></div>      | CRITICAL   |
| Escalate to NIV - Post-op         |                      |                           |              |                          |       |               |                |                        |                                               |                                               |            |
| 7 RCTs                            | serious <sup>b</sup> | serious <sup>c</sup>      | not serious  | serious <sup>a</sup>     | none  | 52/558 (9.3%) | 65/552 (11.8%) | RR 0.77 (0.42 to 1.40) | 27 fewer per 1,000 (from 68 fewer to 47 more) | <div><div>⊕○○○</div><div>VERY LOW</div></div> | CRITICAL   |
| ICU Length of Stay - Post-op      |                      |                           |              |                          |       |               |                |                        |                                               |                                               |            |
| 10 RCTs                           | not serious          | not serious               | not serious  | not serious              | none  | 707           | 709            | -                      | MD 0.02 higher (0.09 lower to 0.13 higher)    | <div><div>⊕⊕⊕⊕</div><div>HIGH</div></div>     | CRITICAL   |
| Hospital Length of Stay - Post-op |                      |                           |              |                          |       |               |                |                        |                                               |                                               |            |
| 11 RCTs                           | not serious          | not serious               | not serious  | not serious              | none  | 639           | 655            | -                      | MD 0.47 lower (0.83 lower to 0.11 lower)      | <div><div>⊕⊕⊕⊕</div><div>HIGH</div></div>     | IMPORTANT  |
| Comfort - Post-op                 |                      |                           |              |                          |       |               |                |                        |                                               |                                               |            |
| 6 RCTs                            | not serious          | very serious <sup>d</sup> | not serious  | not serious <sup>e</sup> | none  | 413           | 415            | -                      | SMD 0.54 lower (1.12 lower to 0.05 higher)    | <div><div>⊕⊕○○</div><div>LOW</div></div>      | IMPORTANT  |
| PaO2 - Post-op                    |                      |                           |              |                          |       |               |                |                        |                                               |                                               |            |
| 2 RCTs                            | not serious          | not serious               | not serious  | not serious              | none  | 158           | 162            | -                      | MD 6.2 lower (8.82 lower to 3.58 lower)       | <div><div>⊕⊕⊕⊕</div><div>HIGH</div></div>     | IMPORTANT  |
| PCO2 - Post-Op                    |                      |                           |              |                          |       |               |                |                        |                                               |                                               |            |

#### **Recommendation 4: High-flow nasal cannula (HFNC) vs. conventional oxygen therapy (COT) in post-operative patients**

|                                                  |             |                          |             |             |      |     |     |   |                                                        |                  |           |
|--------------------------------------------------|-------------|--------------------------|-------------|-------------|------|-----|-----|---|--------------------------------------------------------|------------------|-----------|
| 5 RCTs                                           | not serious | not serious <sup>f</sup> | not serious | not serious | none | 284 | 285 | - | MD <b>1.9 lower</b><br>(4.18 lower to 0.38 higher)     | ⊕⊕⊕⊕<br>HIGH     | IMPORTANT |
| <b>PaO<sub>2</sub>:FiO<sub>2</sub> - Post-op</b> |             |                          |             |             |      |     |     |   |                                                        |                  |           |
| 4 RCTs                                           | not serious | not serious <sup>f</sup> | not serious | not serious | none | 159 | 142 | - | MD <b>34.89 lower</b><br>(84.96 lower to 15.19 higher) | ⊕⊕⊕○<br>MODERATE | IMPORTANT |
| <b>Respiratory Rate - Post-op</b>                |             |                          |             |             |      |     |     |   |                                                        |                  |           |
| 3 RCTs                                           | not serious | serious <sup>e</sup>     | not serious | not serious | none | 178 | 167 | - | MD <b>0.14 lower</b><br>(0.83 lower to 0.54 higher)    | ⊕⊕⊕○<br>MODERATE | IMPORTANT |

**CI:** Confidence interval; **RR:** Risk ratio; **MD:** Mean difference; **SMD:** Standardised mean difference

#### **Explanations**

- Wide 95% confidence intervals which do not exclude clinically important benefit or harm.
- Lack of blinding may have resulted in bias from co-intervention as many trials did not have protocols for escalation of respiratory support.
- Significant heterogeneity ( $I^2 > 50\%$ ) with point estimates on both sides of the line of no effect and limited overlap of 95% confidence intervals.
- Very significant heterogeneity ( $I^2 > 90\%$ ) with point estimates on both sides of the line of no effect and limited overlap of 95% confidence intervals.
- We did not rate down for imprecision as this is accounted for in rating down twice for inconsistency.
- Although there is significant heterogeneity ( $I^2 > 90\%$ ) the discrepancies in absolute effect sizes are of questionable significance

## Recommendation 4: High-flow nasal cannula (HFNC) vs. conventional oxygen therapy (COT) in post-operative patients

### 1. Mortality

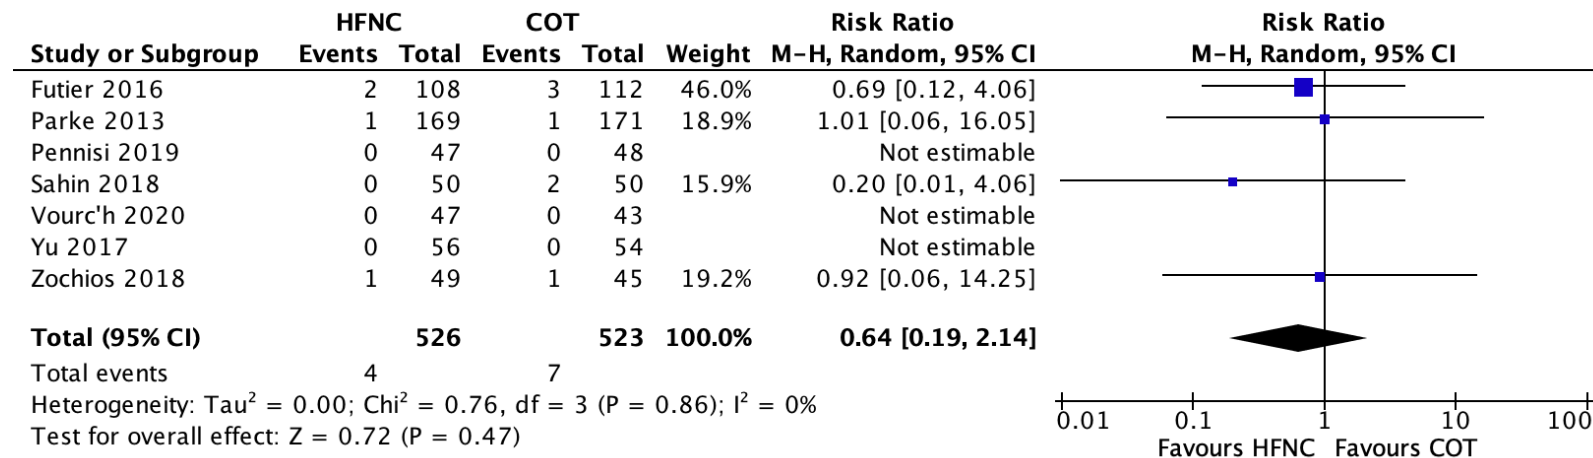

### 2. Re-intubation

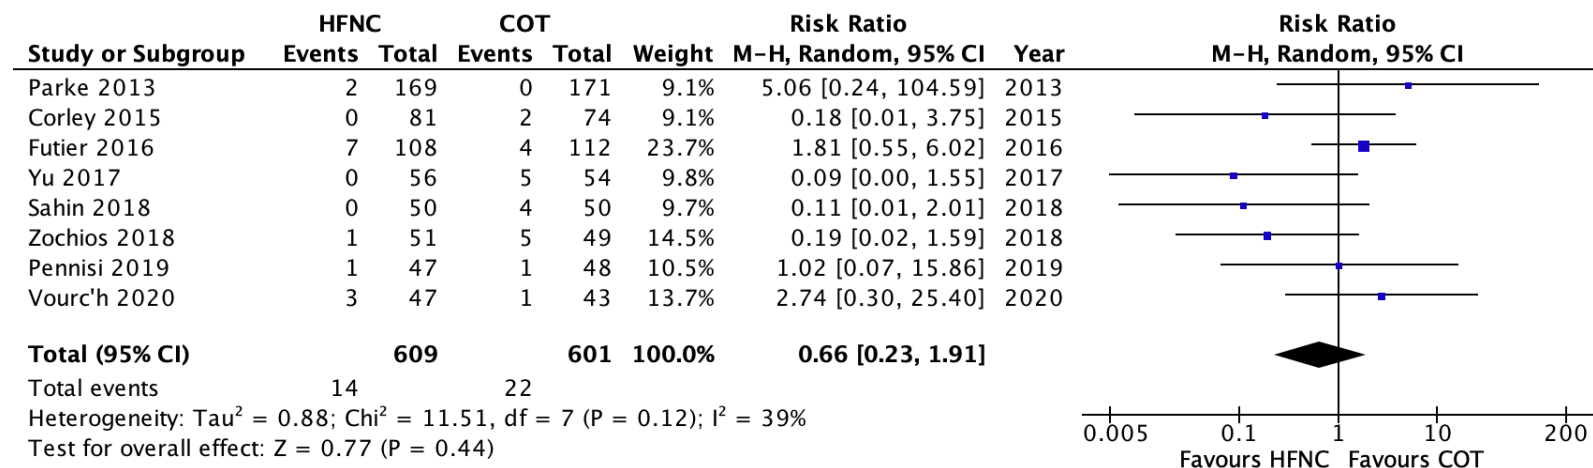

#### Recommendation 4: High-flow nasal cannula (HFNC) vs. conventional oxygen therapy (COT) in post-operative patients

### 3. Escalation to NIV

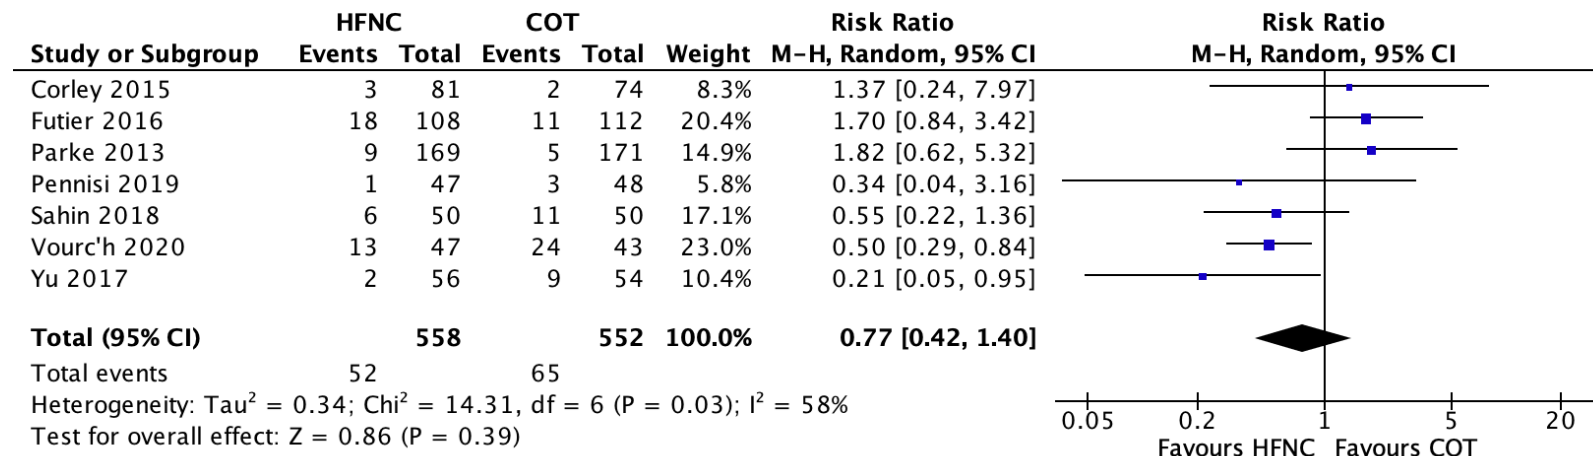

### 4. ICU length of stay

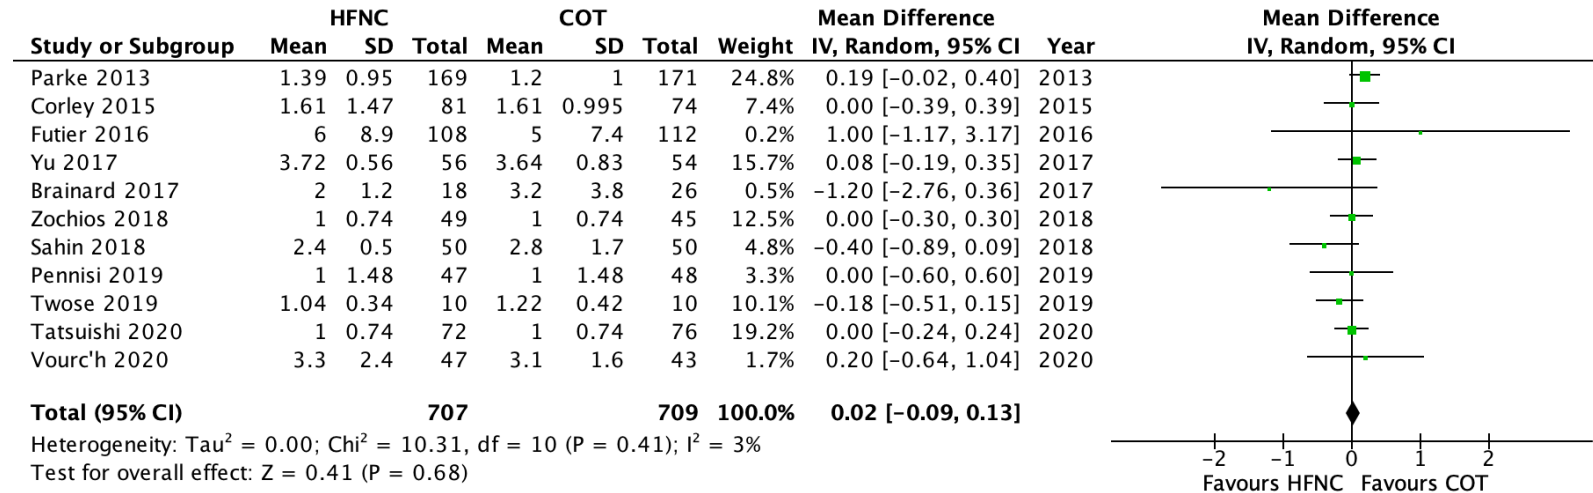

#### Recommendation 4: High-flow nasal cannula (HFNC) vs. conventional oxygen therapy (COT) in post-operative patients

##### 5. Hospital length of stay

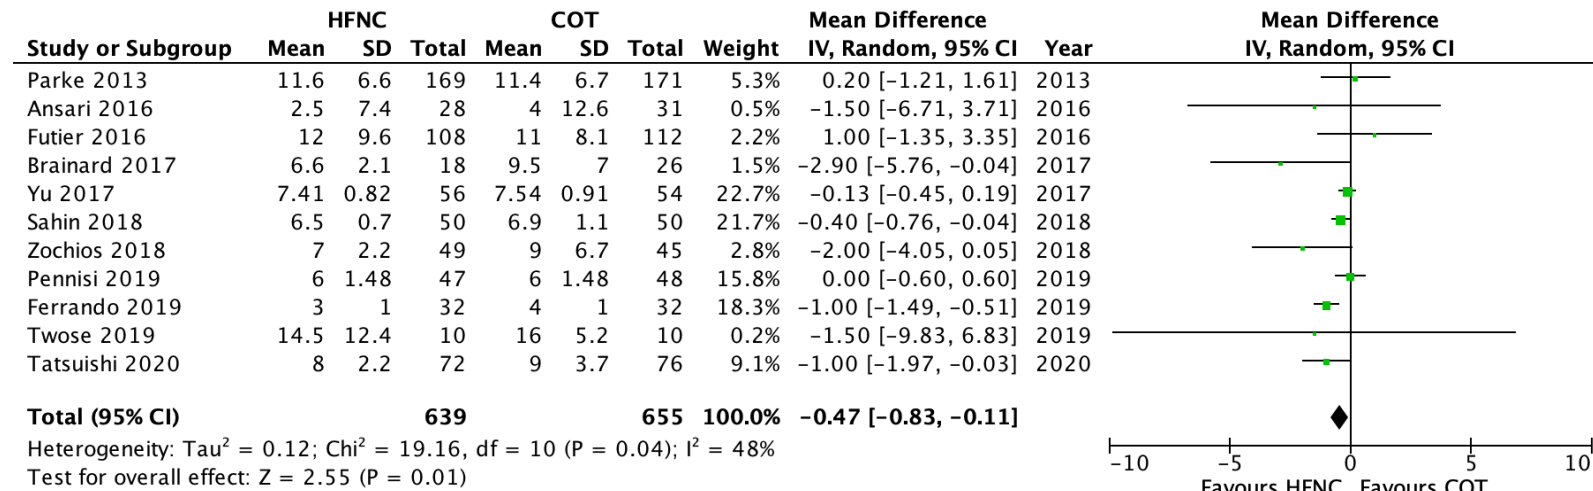

##### 6. Comfort

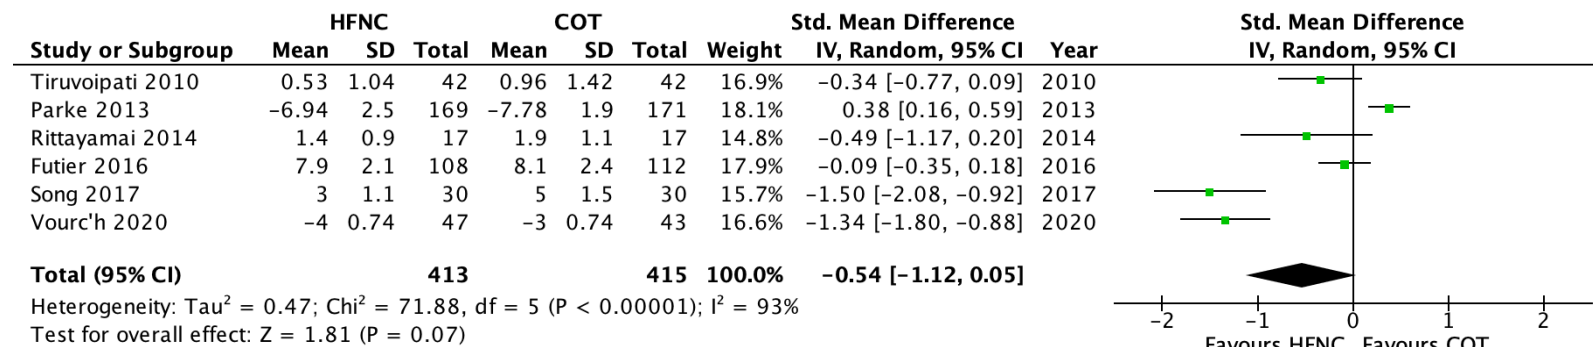

##### 7. PaO2

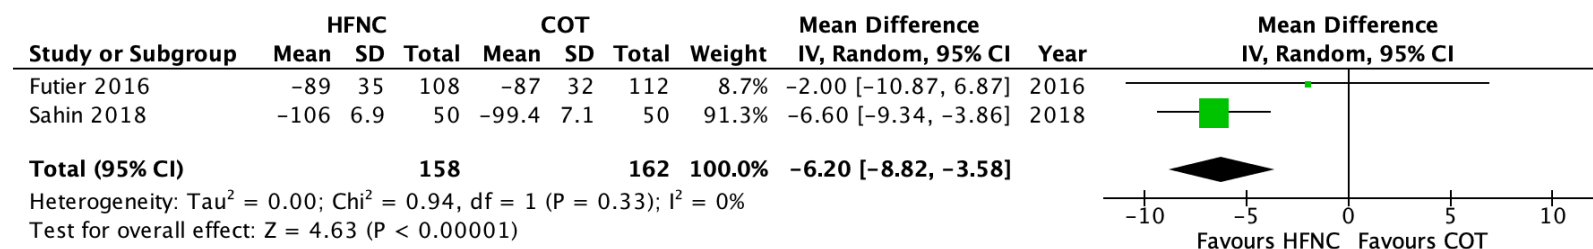

## Recommendation 4: High-flow nasal cannula (HFNC) vs. conventional oxygen therapy (COT) in post-operative patients

### 8. PCO<sub>2</sub>

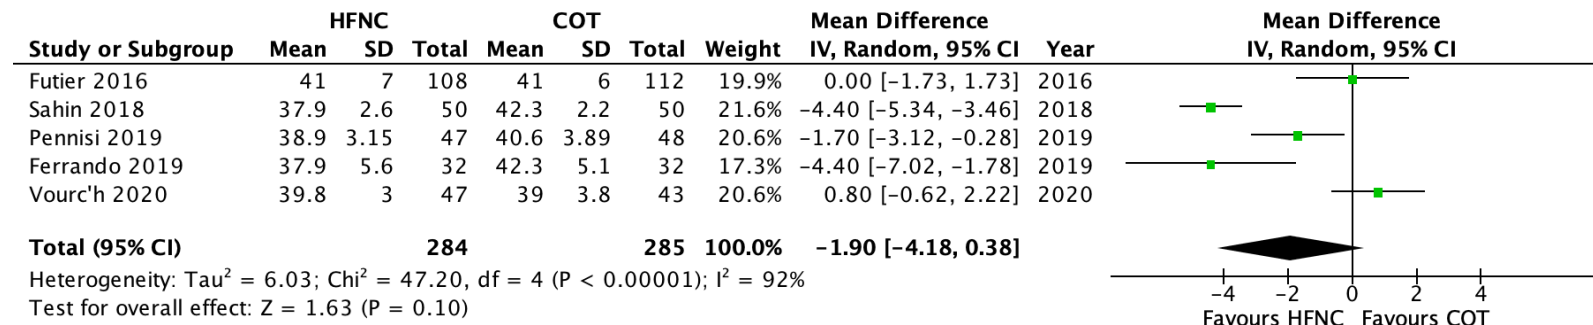

### 9. PaO<sub>2</sub>/FiO<sub>2</sub>

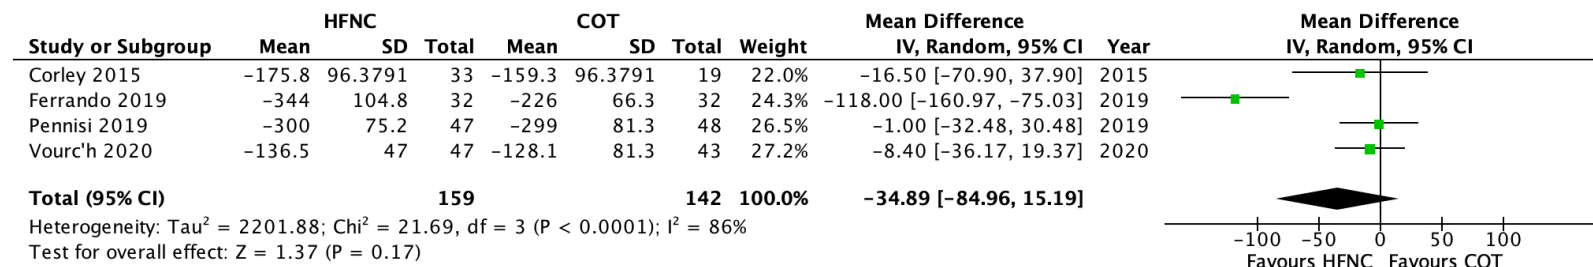

### 10. Respiratory rate

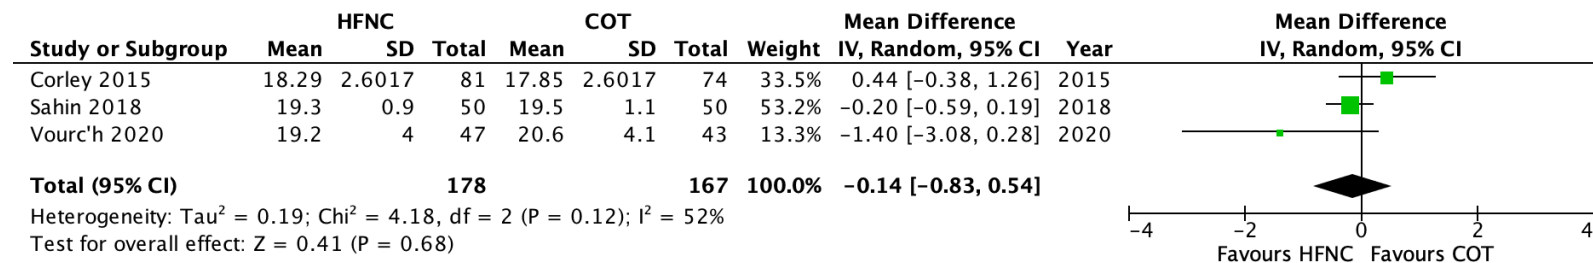

### Recommendation 5: High flow nasal cannula (HFNC) vs. Non-invasive ventilation (NIV) in post-operative patients

| Certainty assessment              |                          |               |                          |                           |       | № of patients  |                | Effect                 |                                              | Certainty        | Importance |
|-----------------------------------|--------------------------|---------------|--------------------------|---------------------------|-------|----------------|----------------|------------------------|----------------------------------------------|------------------|------------|
| № of studies                      | Risk of bias             | Inconsistency | Indirectness             | Imprecision               | Other | HFNC           | NIV            | Relative (95% CI)      | Absolute (95% CI)                            |                  |            |
| Mortality - Post-op               |                          |               |                          |                           |       |                |                |                        |                                              |                  |            |
| 1 RCT                             | not serious              | not serious   | not serious <sup>a</sup> | very serious <sup>b</sup> | none  | 28/414 (6.8%)  | 23/416 (5.5%)  | RR 1.22 (0.72 to 2.09) | 12 more per 1,000 (from 15 fewer to 60 more) | ⊕⊕○○<br>LOW      | CRITICAL   |
| Re-intubation - Post-op           |                          |               |                          |                           |       |                |                |                        |                                              |                  |            |
| 1 RCT                             | not serious <sup>c</sup> | not serious   | not serious <sup>a</sup> | serious <sup>d</sup>      | none  | 58/414 (14.0%) | 57/416 (13.7%) | RR 1.02 (0.73 to 1.44) | 3 more per 1,000 (from 37 fewer to 60 more)  | ⊕⊕⊕○<br>MODERATE | CRITICAL   |
| ICU length of stay - Post-op      |                          |               |                          |                           |       |                |                |                        |                                              |                  |            |
| 1 RCT                             | not serious              | not serious   | not serious <sup>a</sup> | not serious <sup>e</sup>  | none  | 414            | 416            | -                      | MD 0 days (0.6 lower to 0.6 higher)          | ⊕⊕⊕⊕<br>HIGH     | IMPORTANT  |
| Hospital length of stay - Post-op |                          |               |                          |                           |       |                |                |                        |                                              |                  |            |
| 1 RCT                             | not serious              | not serious   | not serious <sup>a</sup> | serious <sup>d</sup>      | none  | 414            | 416            | -                      | MD 1 lower (2.21 lower to 0.21 higher)       | ⊕⊕⊕○<br>MODERATE | IMPORTANT  |
| PCO2 - Post-op                    |                          |               |                          |                           |       |                |                |                        |                                              |                  |            |
| 1 RCT                             | not serious              | not serious   | not serious <sup>a</sup> | not serious               | none  | 414            | 416            | -                      | MD 1.1 mmHg lower (2.02 lower to 0.18 lower) | ⊕⊕⊕⊕<br>HIGH     | IMPORTANT  |
| PaO2:FIO2 - Post-op               |                          |               |                          |                           |       |                |                |                        |                                              |                  |            |
| 1 RCT                             | not serious              | not serious   | not serious <sup>a</sup> | not serious               | none  | 414            | 416            | -                      | MD 63 lower (80 lower to 46 lower)           | ⊕⊕⊕⊕<br>HIGH     | IMPORTANT  |
| Respiratory Rate - Post-op        |                          |               |                          |                           |       |                |                |                        |                                              |                  |            |
| 1 RCT                             | not serious              | not serious   | not serious <sup>a</sup> | not serious               | none  | 414            | 416            | -                      | MD 0.9 RPM lower (1.81 lower to 0.01 higher) | ⊕⊕⊕⊕<br>HIGH     | IMPORTANT  |

CI: Confidence interval; RR: Risk ratio; MD: Mean difference

### **Recommendation 5: High flow nasal cannula (HFNC) vs. Non-invasive ventilation (NIV) in post-operative patients**

#### **Explanations**

- a. Single trial recruited patients after cardiothoracic surgery only; patients with other types of surgery are not represented in this evidence.
- b. Very wide 95% confidence interval does not exclude moderate harm or small benefit of HFNC.
- c. Single included trial used pre-specified criteria for escalation of respiratory support, including intubation.
- d. Wide 95% confidence interval does not exclude clinically meaningful benefit or harm.
- e. Though not statistically significant, the 95% confidence intervals likely exclude a meaningful benefit (less than 1 day difference).



## Recommendation 5: High flow nasal cannula (HFNC) vs. Non-invasive ventilation (NIV) in post-operative patients

### 1. Mortality

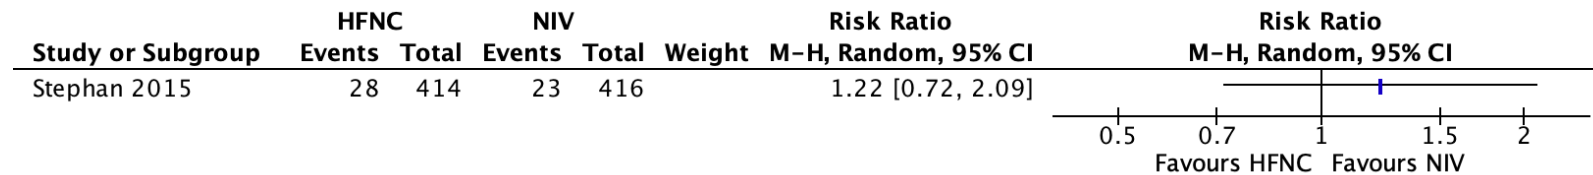

### 2. Re-intubation

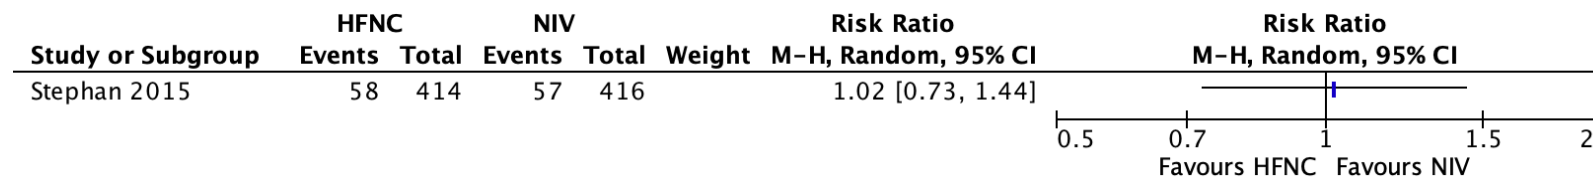

### 3. ICU length of stay

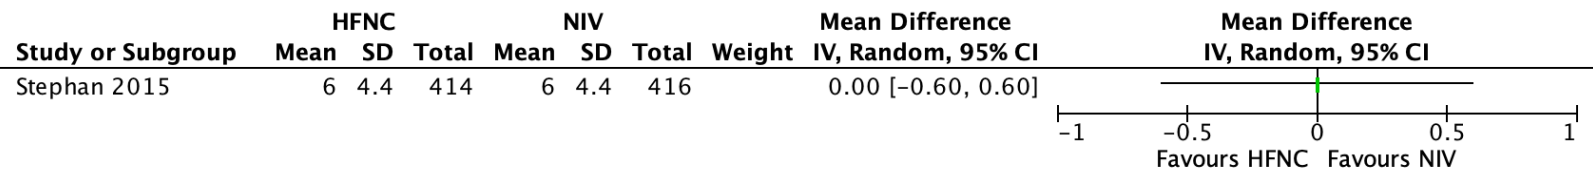

### 4. Hospital length of stay

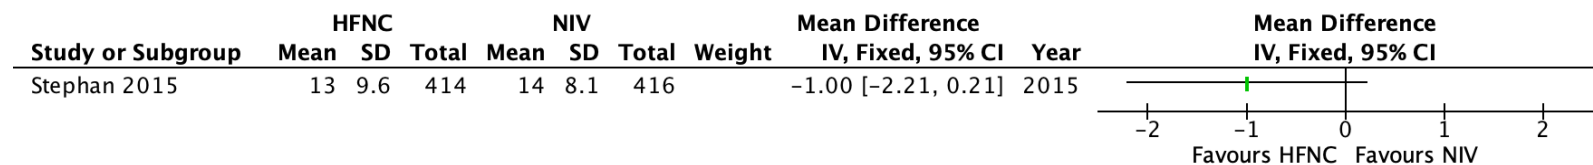

### 5. PCO2

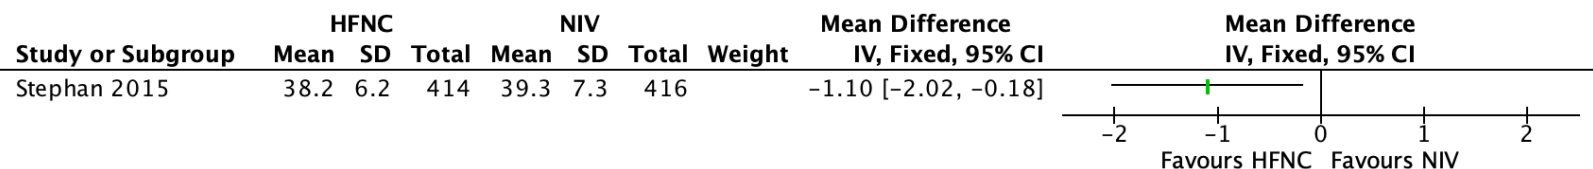

## Recommendation 5: High flow nasal cannula (HFNC) vs. Non-invasive ventilation (NIV) in post-operative patients

### 6. PaO<sub>2</sub>/FiO<sub>2</sub>

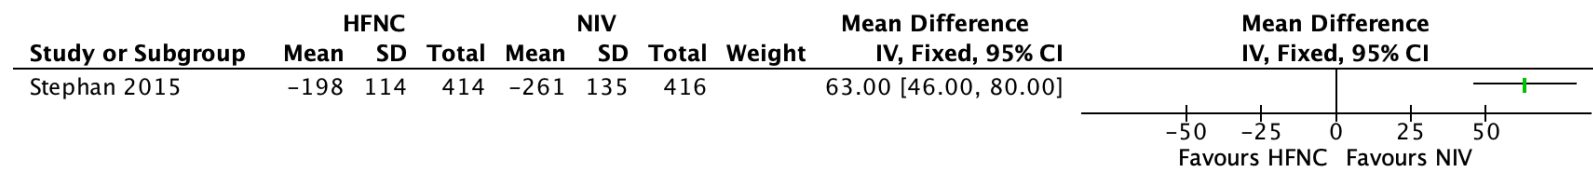

### 7. Respiratory rate

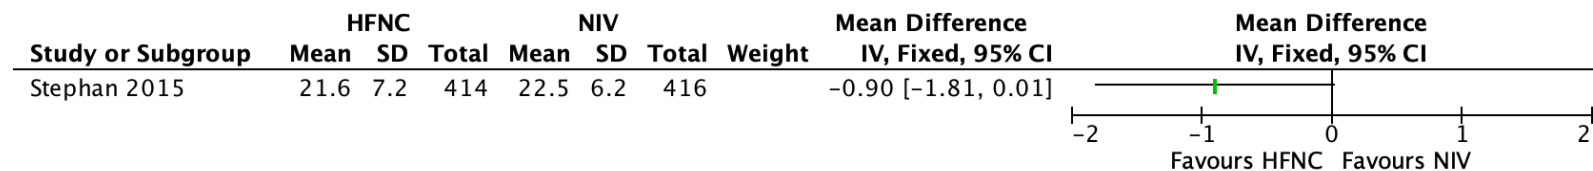

**Recommendation 6: High-flow nasal cannula (HFNC) vs. conventional oxygen therapy (COT) to prevent extubation failure in non-surgical patients**

| Certainty assessment    |                      |                          |              |                          |       | № of patients |                | Effect                 |                                                 | Certainty        | Importance |
|-------------------------|----------------------|--------------------------|--------------|--------------------------|-------|---------------|----------------|------------------------|-------------------------------------------------|------------------|------------|
| № of studies            | Risk of bias         | Inconsistency            | Indirectness | Imprecision              | Other | HFNC          | COT            | Relative (95% CI)      | Absolute (95% CI)                               |                  |            |
| Mortality               |                      |                          |              |                          |       |               |                |                        |                                                 |                  |            |
| 9 RCTs                  | not serious          | not serious              | not serious  | serious <sup>a</sup>     | none  | 42/503 (8.3%) | 41/495 (8.3%)  | RR 1.01 (0.68 to 1.52) | 1 more per 1,000 (from 27 fewer to 43 more)     | ⊕⊕⊕○<br>MODERATE | CRITICAL   |
| Re-intubation           |                      |                          |              |                          |       |               |                |                        |                                                 |                  |            |
| 10 RCTs                 | serious <sup>b</sup> | not serious              | not serious  | not serious <sup>c</sup> | none  | 42/563 (7.5%) | 75/564 (13.3%) | RR 0.62 (0.38 to 1.01) | 51 fewer per 1,000 (from 82 fewer to 1 more)    | ⊕⊕⊕○<br>MODERATE | CRITICAL   |
| Escalate to NIV         |                      |                          |              |                          |       |               |                |                        |                                                 |                  |            |
| 6 RCTs                  | serious <sup>b</sup> | not serious              | not serious  | not serious              | none  | 15/260 (5.8%) | 40/265 (15.1%) | RR 0.38 (0.17 to 0.85) | 94 fewer per 1,000 (from 125 fewer to 23 fewer) | ⊕⊕⊕○<br>MODERATE | CRITICAL   |
| ICU Length of Stay      |                      |                          |              |                          |       |               |                |                        |                                                 |                  |            |
| 6 RCTs                  | not serious          | not serious              | not serious  | not serious <sup>c</sup> | none  | 485           | 487            | -                      | MD 0.29 higher (0.27 lower to 0.85 higher)      | ⊕⊕⊕⊕<br>HIGH     | IMPORTANT  |
| Hospital Length of Stay |                      |                          |              |                          |       |               |                |                        |                                                 |                  |            |
| 4 RCTs                  | not serious          | serious <sup>d</sup>     | not serious  | serious <sup>a</sup>     | none  | 424           | 417            | -                      | MD 1.08 lower (4.83 lower to 2.66 higher)       | ⊕⊕○○<br>LOW      | IMPORTANT  |
| Comfort                 |                      |                          |              |                          |       |               |                |                        |                                                 |                  |            |
| 3 RCTs                  | not serious          | not serious <sup>e</sup> | not serious  | not serious              | none  | 89            | 89             | -                      | SMD 0.77 lower (1.5 lower to 0.03 lower)        | ⊕⊕⊕⊕<br>HIGH     | IMPORTANT  |
| PaO2                    |                      |                          |              |                          |       |               |                |                        |                                                 |                  |            |
| 5 RCTs                  | not serious          | not serious              | not serious  | not serious              | none  | 165           | 154            | -                      | MD 7.57 higher (2.68 higher to 12.46 higher)    | ⊕⊕⊕⊕<br>HIGH     | IMPORTANT  |
| PCO2                    |                      |                          |              |                          |       |               |                |                        |                                                 |                  |            |

### **Recommendation 6: High-flow nasal cannula (HFNC) vs. conventional oxygen therapy (COT) to prevent extubation failure in non-surgical patients**

|                                        |             |                          |             |                      |      |     |     |   |                                                         |              |           |
|----------------------------------------|-------------|--------------------------|-------------|----------------------|------|-----|-----|---|---------------------------------------------------------|--------------|-----------|
| 7 RCTs                                 | not serious | not serious              | not serious | not serious          | none | 460 | 446 | - | MD <b>0.15 lower</b><br>(1.89 lower to 1.58 higher)     | ⊕⊕⊕⊕<br>HIGH | IMPORTANT |
| <b>PaO<sub>2</sub>:FiO<sub>2</sub></b> |             |                          |             |                      |      |     |     |   |                                                         |              |           |
| 4 RCTs                                 | not serious | serious <sup>d</sup>     | not serious | serious <sup>a</sup> | none | 378 | 383 | - | MD <b>14.13 higher</b><br>(20.48 lower to 48.75 higher) | ⊕⊕○○<br>LOW  | IMPORTANT |
| <b>Respiratory Rate</b>                |             |                          |             |                      |      |     |     |   |                                                         |              |           |
| 7 RCTs                                 | not serious | not serious <sup>f</sup> | not serious | not serious          | none | 213 | 200 | - | MD <b>1.98 lower</b><br>(3.9 lower to 0.06 lower)       | ⊕⊕⊕⊕<br>HIGH | IMPORTANT |

**CI:** Confidence interval; **RR:** Risk ratio; **MD:** Mean difference; **SMD:** Standardised mean difference

#### **Explanations**

- a. Wide 95% confidence intervals do not exclude clinically significant benefit nor harm.
- b. Lack of blinding may have resulted in bias from co-intervention, though several trials did have specific criteria for escalation of respiratory support.
- c. Though not statistically significant, 95% confidence interval likely excludes a significant differences.
- d. Large values of I<sup>2</sup> (>70%) with point estimates on both sides of the line of no effect.
- e. Significant statistical heterogeneity, however all estimates of effect favour HFNC.
- f. Although significant statistical heterogeneity, the absolute differences are of questionable clinical significance.

## Recommendation 6: High-flow nasal cannula (HFNC) vs. conventional oxygen therapy (COT) to prevent extubation failure in non-surgical patients

### 1. Mortality

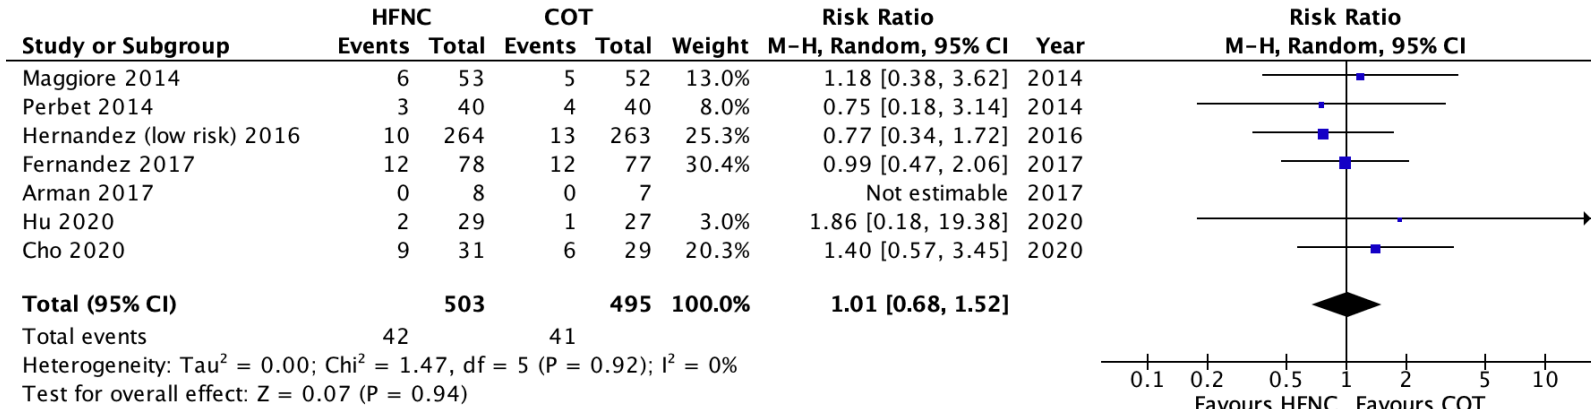

### 2. Re-intubation

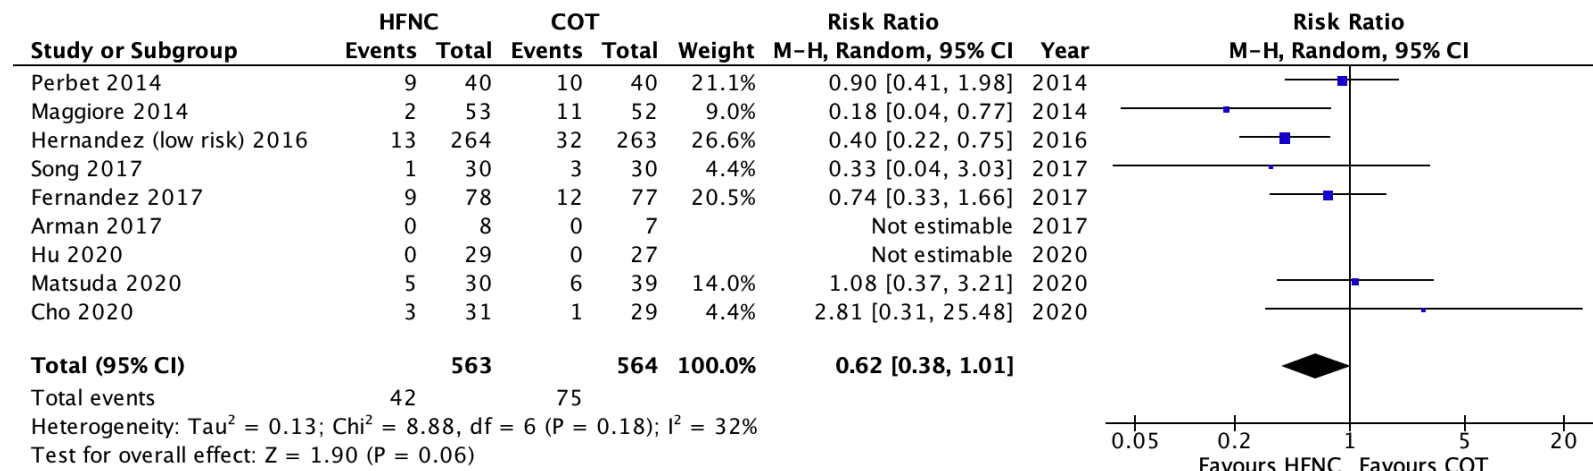

## Recommendation 6: High-flow nasal cannula (HFNC) vs. conventional oxygen therapy (COT) to prevent extubation failure in non-surgical patients

### 3. Escalation to NIV

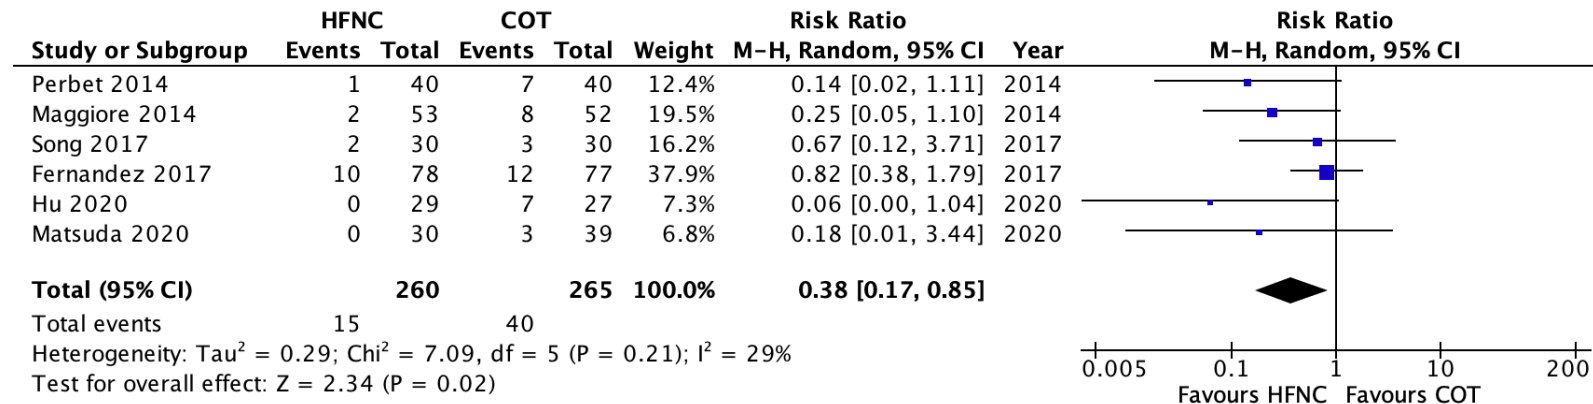

### 4. ICU length of stay

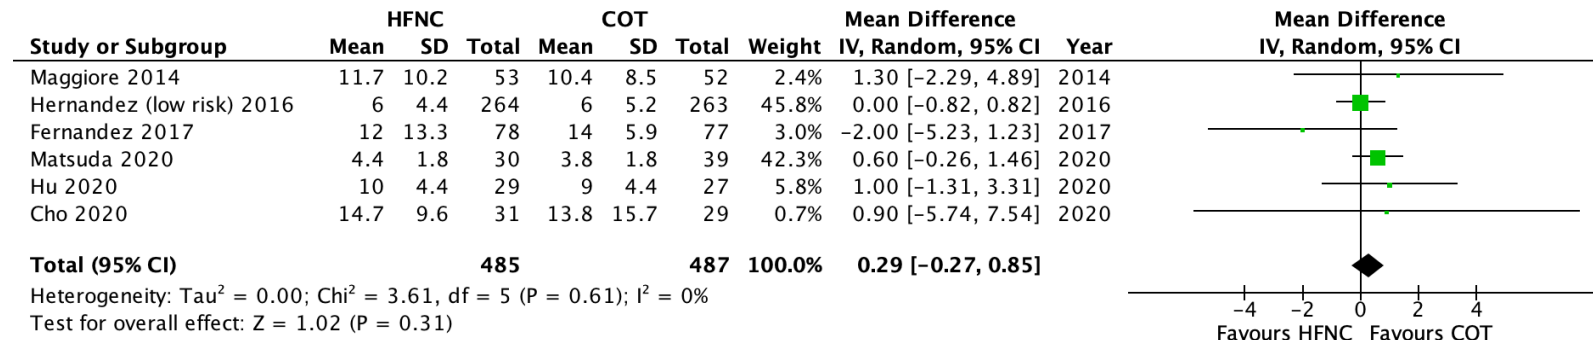

## Recommendation 6: High-flow nasal cannula (HFNC) vs. conventional oxygen therapy (COT) to prevent extubation failure in non-surgical patients

### 5. Hospital length of stay

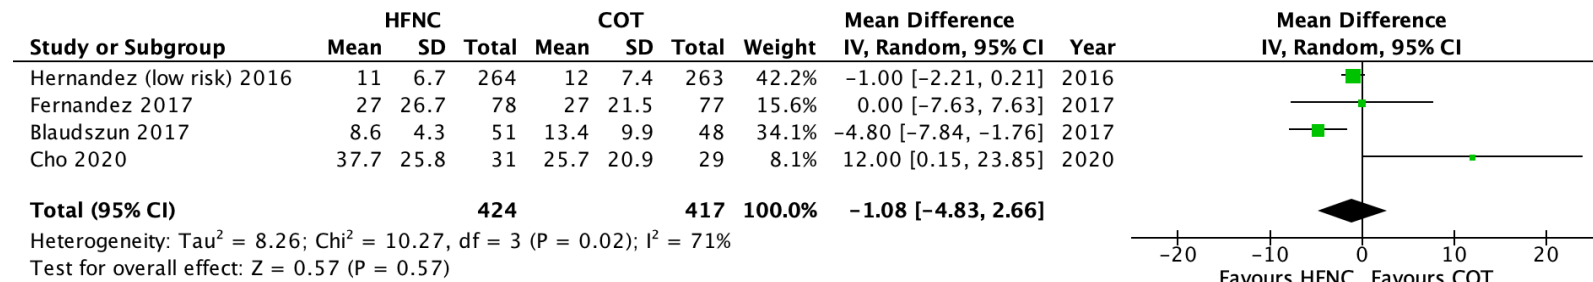

### 6. Comfort

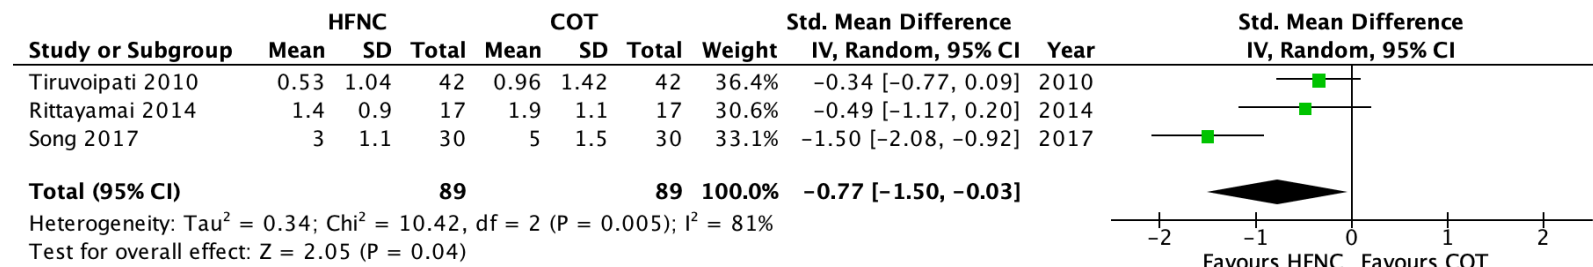

### 7. PaO2

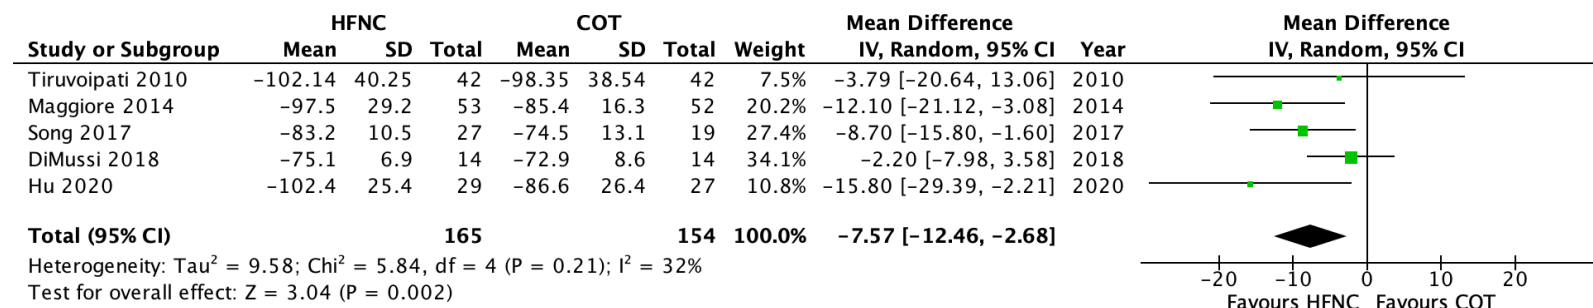

## Recommendation 6: High-flow nasal cannula (HFNC) vs. conventional oxygen therapy (COT) to prevent extubation failure in non-surgical patients

### 8. PCO<sub>2</sub>

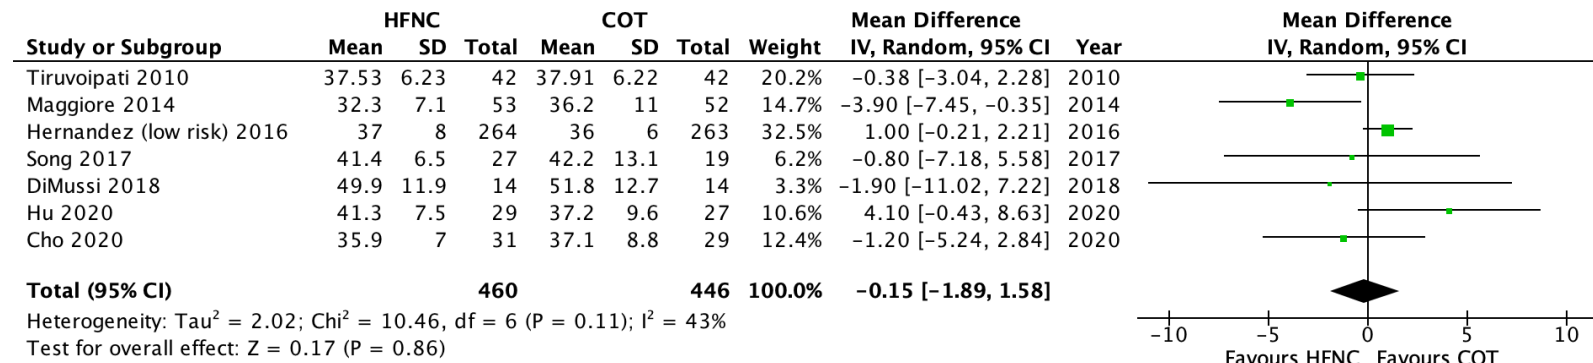

### 9. PaO<sub>2</sub>/FiO<sub>2</sub>

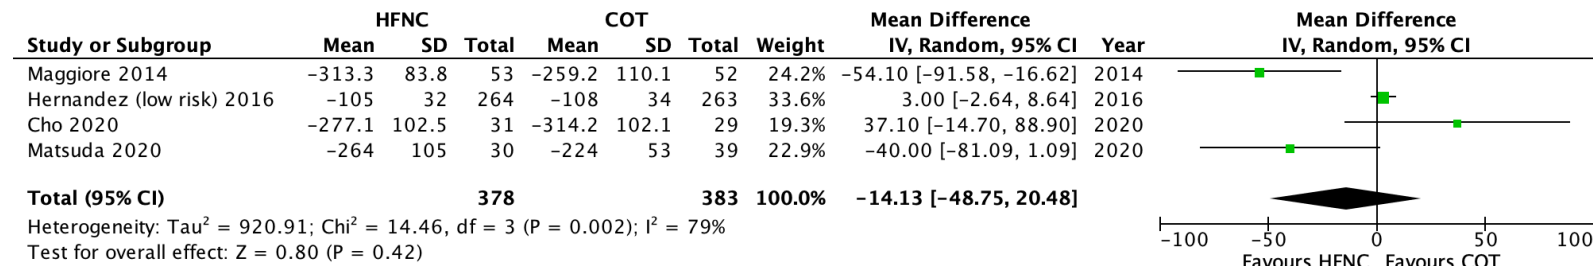

### 10. Respiratory rate

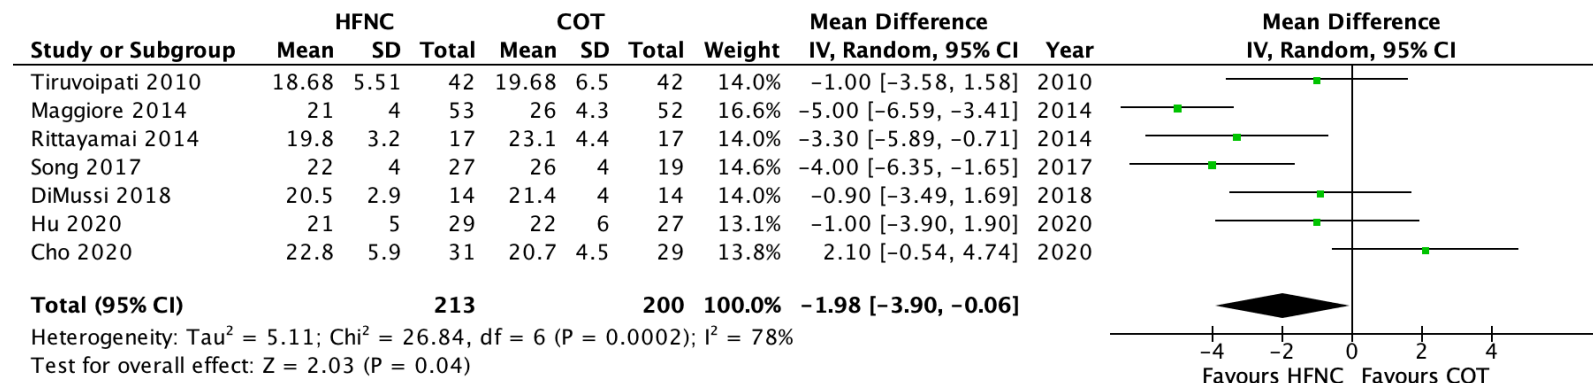



### Recommendation 7: High flow nasal cannula (HFNC) vs. non-invasive ventilation (NIV) to prevent extubation failure in non-surgical patients

| Certainty assessment                  |                          |                          |              |                          |       | № of patients   |                 | Effect                 |                                                                   | Certainty        | Importance |
|---------------------------------------|--------------------------|--------------------------|--------------|--------------------------|-------|-----------------|-----------------|------------------------|-------------------------------------------------------------------|------------------|------------|
| № of studies                          | Risk of bias             | Inconsistency            | Indirectness | Imprecision              | Other | HFNC            | NIV             | Relative (95% CI)      | Absolute (95% CI)                                                 |                  |            |
| Mortality - General ICU               |                          |                          |              |                          |       |                 |                 |                        |                                                                   |                  |            |
| 5 RCTs                                | not serious              | not serious              | not serious  | serious <sup>a</sup>     | none  | 111/729 (15.2%) | 112/784 (14.3%) | RR 1.07 (0.84 to 1.36) | 10 more per 1,000 (from 23 fewer to 51 more)                      | ⊕⊕⊕○<br>MODERATE | CRITICAL   |
| Re-intubation - General ICU           |                          |                          |              |                          |       |                 |                 |                        |                                                                   |                  |            |
| 5 RCTs                                | not serious <sup>b</sup> | not serious              | not serious  | serious                  | none  | 139/746 (18.6%) | 115/803 (14.3%) | RR 1.31 (1.04 to 1.64) | 44 more per 1,000 (from 6 more to 92 more)                        | ⊕⊕⊕⊕<br>HIGH     | CRITICAL   |
| ICU length of stay - General ICU      |                          |                          |              |                          |       |                 |                 |                        |                                                                   |                  |            |
| 4 RCTs                                | not serious              | not serious              | not serious  | not serious              | none  | 658             | 705             | -                      | MD 1.0 days lower (1.52 lower to 0.47 lower)                      | ⊕⊕⊕⊕<br>HIGH     | IMPORTANT  |
| Hospital length of stay - General ICU |                          |                          |              |                          |       |                 |                 |                        |                                                                   |                  |            |
| 3 RCTs                                | not serious              | not serious              | not serious  | not serious              | none  | 636             | 695             | -                      | MD 1.44 days lower (2.63 lower to 0.25 lower)                     | ⊕⊕⊕⊕<br>HIGH     | IMPORTANT  |
| Comfort - General ICU                 |                          |                          |              |                          |       |                 |                 |                        |                                                                   |                  |            |
| 4 RCTs                                | not serious              | not serious              | not serious  | not serious              | none  | 85              | 79              | -                      | SMD 0.73 SD lower (0.98 lower to 0.49 lower)                      | ⊕⊕⊕⊕<br>HIGH     | IMPORTANT  |
| PCO2 - General ICU                    |                          |                          |              |                          |       |                 |                 |                        |                                                                   |                  |            |
| 3 RCTs                                | not serious              | not serious              | not serious  | not serious              | none  | 356             | 376             | -                      | MD 1.01 mmHg lower (1.47 lower to 0.55 lower)                     | ⊕⊕⊕⊕<br>HIGH     | IMPORTANT  |
| PaO2:FIO2 - General ICU               |                          |                          |              |                          |       |                 |                 |                        |                                                                   |                  |            |
| 3 RCTs                                | not serious              | not serious              | not serious  | not serious <sup>c</sup> | none  | 356             | 376             | -                      | MD 3.86 higher (0.39 higher to 7.34 higher)                       | ⊕⊕⊕⊕<br>HIGH     | IMPORTANT  |
| Respiratory Rate - General ICU        |                          |                          |              |                          |       |                 |                 |                        |                                                                   |                  |            |
| 2 RCTs                                | not serious              | not serious <sup>d</sup> | not serious  | not serious <sup>c</sup> | none  | 66              | 62              | -                      | MD 0.59 respirations per minute lower (2.48 lower to 1.29 higher) | ⊕⊕⊕⊕<br>HIGH     | IMPORTANT  |

### **Recommendation 7: High flow nasal cannula (HFNC) vs. non-invasive ventilation (NIV) to prevent extubation failure in non-surgical patients**

**CI:** Confidence interval; **RR:** Risk ratio; **MD:** Mean difference; **SMD:** Standardised mean difference

#### **Explanations**

- a. Wide 95% confidence intervals do not exclude the possibility of meaningful benefit nor harm.
- b. Lack of blinding may have resulted in bias from co-intervention, though most trials did have specific criteria for escalation of respiratory support, including intubation.
- c. Though not statistically significant, 95% confidence interval likely excludes a meaningful difference.
- d. Statistically significant statistical heterogeneity, but considerable overlap of confidence intervals.

## Recommendation 7: High flow nasal cannula (HFNC) vs. non-invasive ventilation (NIV) to prevent extubation failure in non-surgical patients

### 1. Mortality

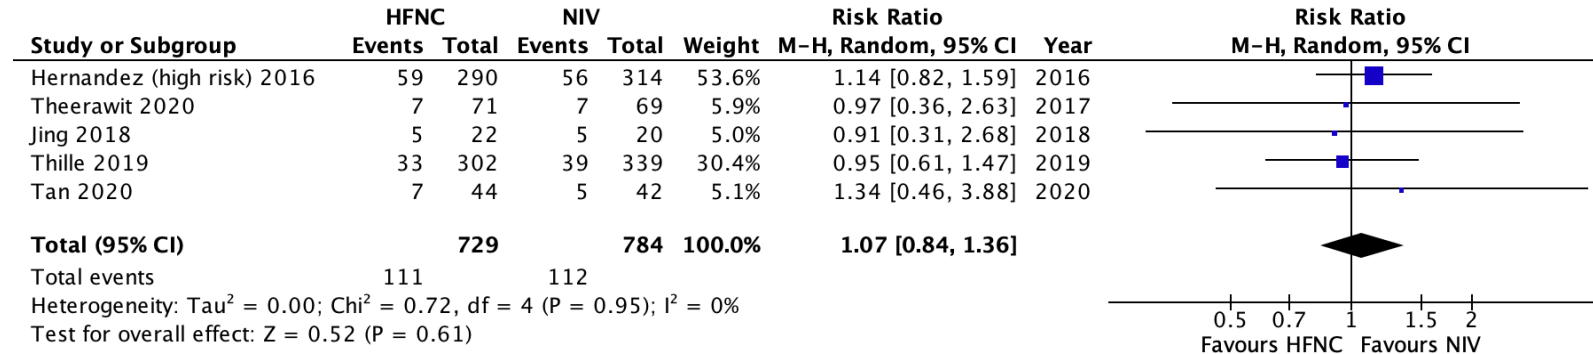

### 2. Re-intubation

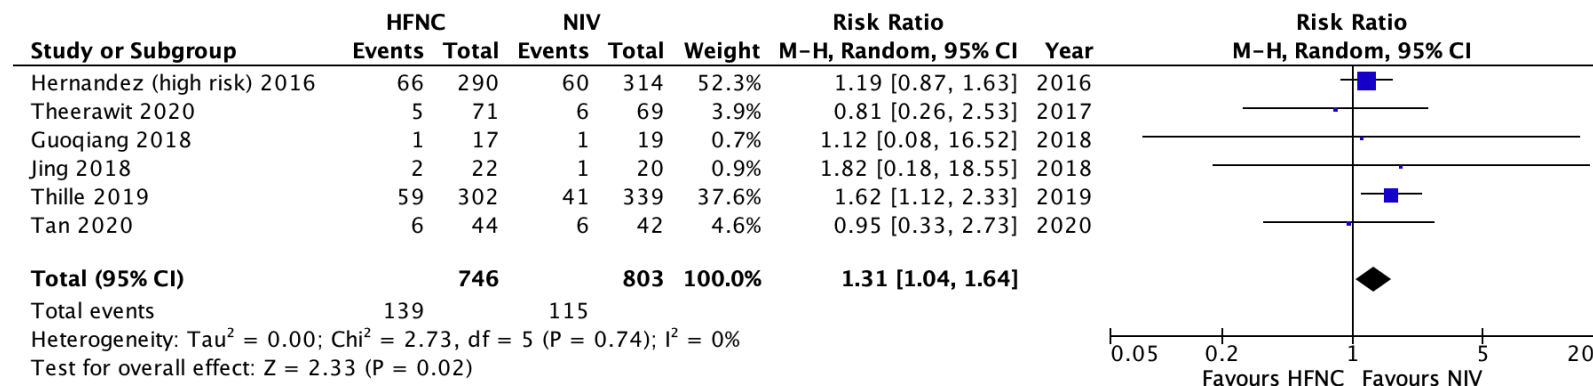

## Recommendation 7: High flow nasal cannula (HFNC) vs. non-invasive ventilation (NIV) to prevent extubation failure in non-surgical patients

### 3. ICU length of stay

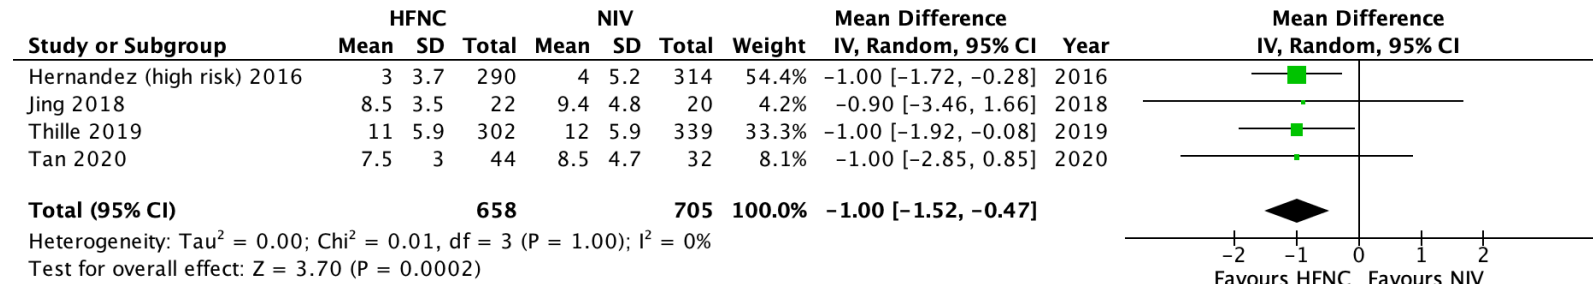

### 4. Hospital length of stay

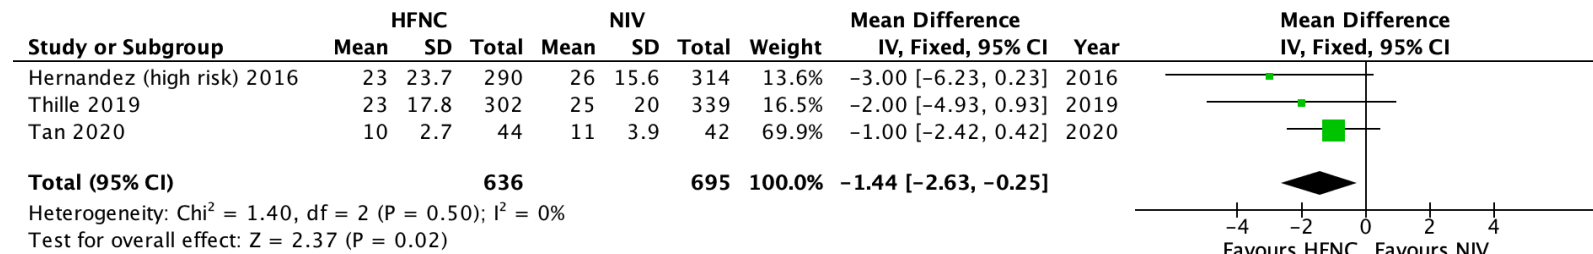

### 5. Comfort

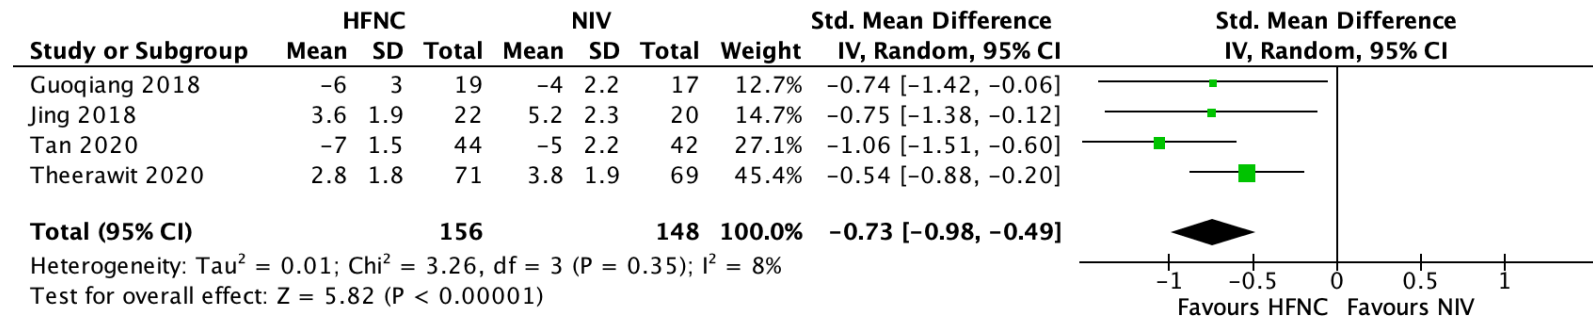

## Recommendation 7: High flow nasal cannula (HFNC) vs. non-invasive ventilation (NIV) to prevent extubation failure in non-surgical patients

### 6. Dyspnea

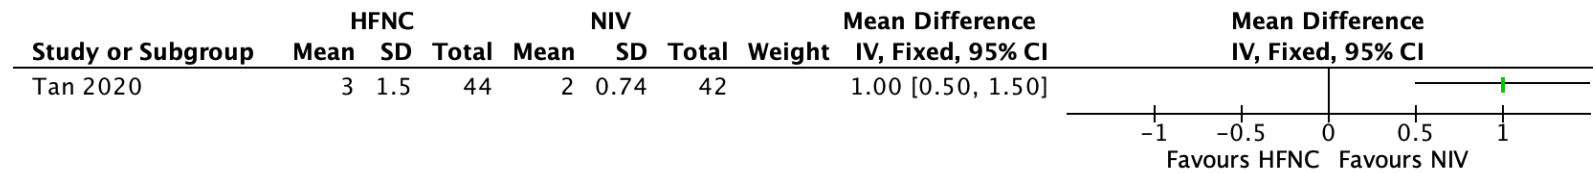

### 8. PCO<sub>2</sub>

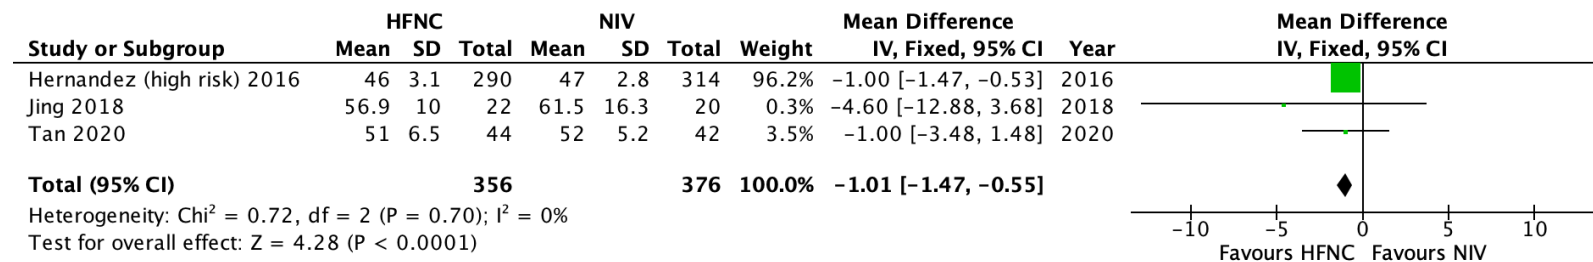

### 9. PaO<sub>2</sub>/FiO<sub>2</sub>

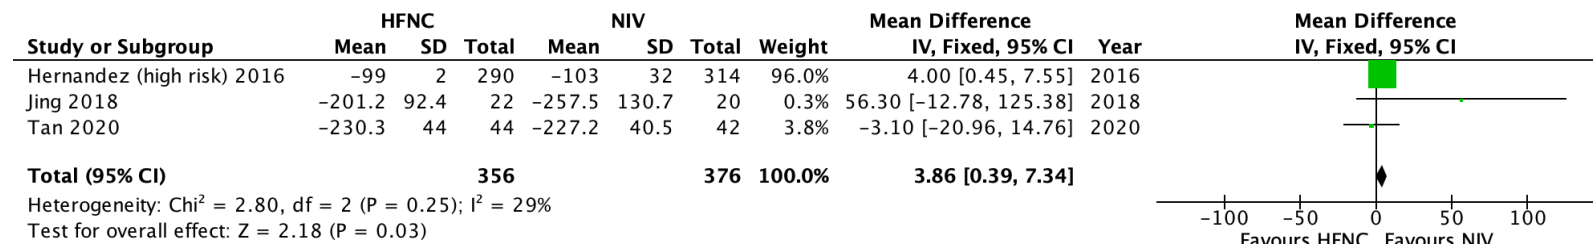

### 9. Respiratory rate

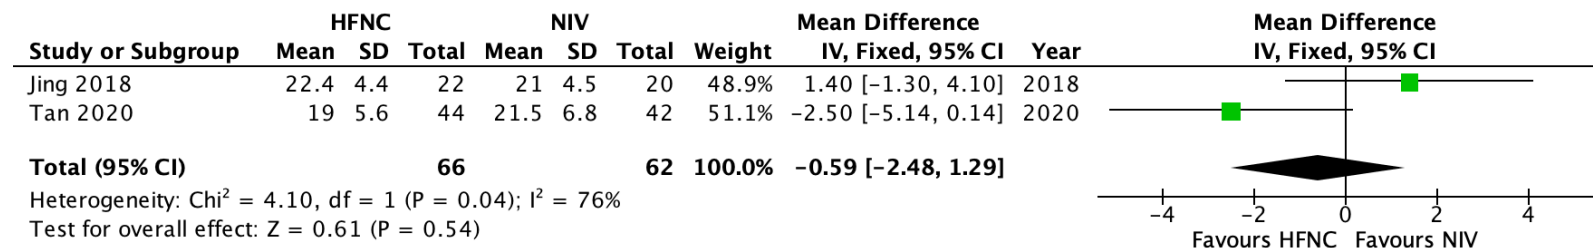

### **Recommendation 8: High-flow nasal cannula (HFNC) vs. non-invasive ventilation (NIV) in hypercapnic respiratory failure**

| Certainty assessment                            |                          |                      |                          |                           |                      | Ne of patients |                | Effect                 |                                               | Certainty                                                                                         | Importance |
|-------------------------------------------------|--------------------------|----------------------|--------------------------|---------------------------|----------------------|----------------|----------------|------------------------|-----------------------------------------------|---------------------------------------------------------------------------------------------------|------------|
| № of studies                                    | Risk of bias             | Inconsistency        | Indirectness             | Imprecision               | Other considerations | HFNC           | NIV            | Relative (95% CI)      | Absolute (95% CI)                             |                                                                                                   |            |
| Mortality - RCTs                                |                          |                      |                          |                           |                      |                |                |                        |                                               |                                                                                                   |            |
| 4 RCTs                                          | not serious              | not serious          | not serious <sup>a</sup> | very serious <sup>b</sup> | none                 | 18/127 (14.2%) | 21/123 (17.1%) | RR 0.82 (0.46 to 1.47) | 31 fewer per 1,000 (from 92 fewer to 80 more) | <br>LOW        | CRITICAL   |
| Intubation - RCTs                               |                          |                      |                          |                           |                      |                |                |                        |                                               |                                                                                                   |            |
| 4 RCTs                                          | not serious              | not serious          | not serious <sup>a</sup> | very serious <sup>b</sup> | none                 | 19/141 (13.5%) | 23/134 (17.2%) | RR 0.79 (0.46 to 1.35) | 36 fewer per 1,000 (from 93 fewer to 60 more) | <br>LOW        | CRITICAL   |
| ICU length of stay - RCTs                       |                          |                      |                          |                           |                      |                |                |                        |                                               |                                                                                                   |            |
| 3 RCTs                                          | not serious              | not serious          | not serious              | serious <sup>c</sup>      | none                 | 118            | 117            | -                      | MD 0.1 higher (0.73 lower to 0.94 higher)     | <br>MODERATE   | IMPORTANT  |
| Hospital length of stay - RCTs                  |                          |                      |                          |                           |                      |                |                |                        |                                               |                                                                                                   |            |
| 4 RCTs                                          | not serious              | not serious          | not serious              | serious <sup>c</sup>      | none                 | 178            | 174            | -                      | MD 0.82 days lower (1.83 lower to 0.2 higher) | <br>MODERATE   | IMPORTANT  |
| Comfort (lower is better) (Scale from: 0 to 10) |                          |                      |                          |                           |                      |                |                |                        |                                               |                                                                                                   |            |
| 2 RCTs                                          | not serious <sup>d</sup> | serious <sup>e</sup> | not serious              | serious <sup>f</sup>      | none                 | 49             | 52             | -                      | SMD 0.57 SD lower (0.98 lower to 0.16 lower)  | <br>LOW      | IMPORTANT  |
| Dyspnea                                         |                          |                      |                          |                           |                      |                |                |                        |                                               |                                                                                                   |            |
| 3 RCTs                                          | not serious <sup>d</sup> | not serious          | not serious              | serious <sup>c</sup>      | none                 | 77             | 76             | -                      | MD 0.31 lower (0.94 lower to 0.33 higher)     | <br>MODERATE | IMPORTANT  |
| PaO2/FiO2 - RCTs (follow up: mean 6 hours)      |                          |                      |                          |                           |                      |                |                |                        |                                               |                                                                                                   |            |

### **Recommendation 8: High-flow nasal cannula (HFNC) vs. non-invasive ventilation (NIV) in hypercapnic respiratory failure**

|                                |             |                      |                          |                      |      |     |     |   |                                                          |              |           |
|--------------------------------|-------------|----------------------|--------------------------|----------------------|------|-----|-----|---|----------------------------------------------------------|--------------|-----------|
| 2 RCTs                         | not serious | not serious          | not serious <sup>a</sup> | not serious          | none | 44  | 44  | - | MD <b>0.52 lower</b><br>(3.59 lower to 2.56 higher)      | ⊕⊕⊕⊕<br>HIGH | IMPORTANT |
| <b>PO2 - RCTs</b>              |             |                      |                          |                      |      |     |     |   |                                                          |              |           |
| 3 RCTs                         | not serious | not serious          | not serious              | not serious          | none | 151 | 109 | - | MD <b>0.32 higher</b><br>(3.83 lower to 4.47 higher)     | ⊕⊕⊕⊕<br>HIGH | IMPORTANT |
| <b>PCO2 - RCTs</b>             |             |                      |                          |                      |      |     |     |   |                                                          |              |           |
| 6 RCTs                         | not serious | serious <sup>e</sup> | not serious              | serious <sup>c</sup> | none | 230 | 227 | - | MD <b>0.79 mmHg lower</b><br>(5.19 lower to 3.61 higher) | ⊕⊕○○<br>LOW  | IMPORTANT |
| <b>Respiratory rate - RCTs</b> |             |                      |                          |                      |      |     |     |   |                                                          |              |           |
| 5 RCTs                         | not serious | not serious          | not serious              | not serious          | none | 148 | 144 | - | MD <b>0.40 lower</b><br>(1.60 lower to 0.8 higher)       | ⊕⊕⊕⊕<br>HIGH | IMPORTANT |

**CI:** Confidence interval; **RR:** Risk ratio; **MD:** Mean difference; **SMD:** Standardised mean difference

#### **Explanations**

- a. NIV settings in comparison group appear to have been reasonable and titrated to patient need in most studies.
- b. Very wide 95% confidence intervals resulting in very serious imprecision.
- c. Wide 95% confidence intervals which do not rule out significant benefit nor harm.
- d. High statistical heterogeneity with study point estimates on opposite sides of the line of no effect.
- e. Lack of blinding of patients may result in bias, but given the immediacy of the comfort/discomfort using NIV/HFNC we judge patient assessments of comfort and dyspnea to be of lower risk of bias.
- f. Statistically significant but optimal information size not met.

## Recommendation 8: High-flow nasal cannula (HFNC) vs. non-invasive ventilation (NIV) in hypercapnic respiratory failure

### 1. Mortality

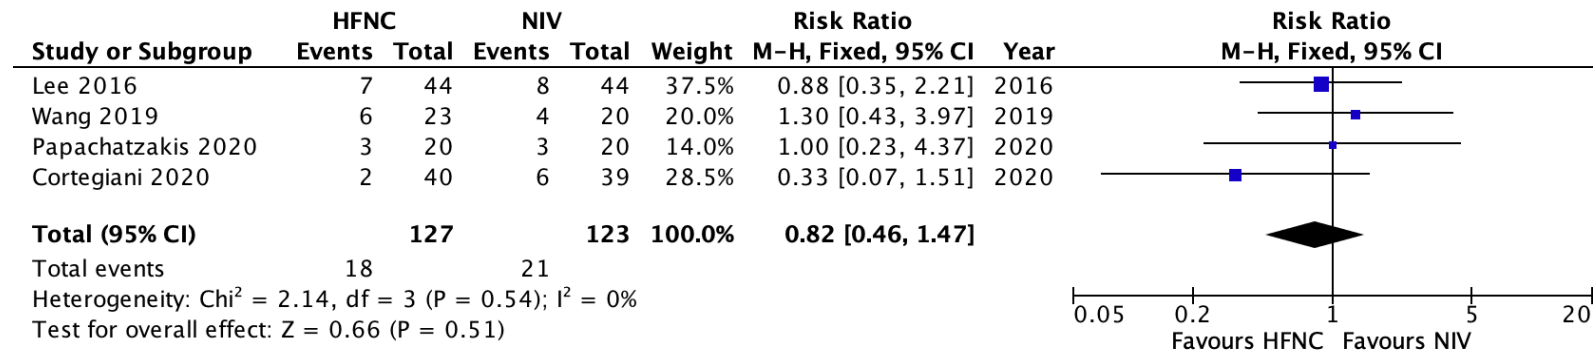

### 2. Intubation

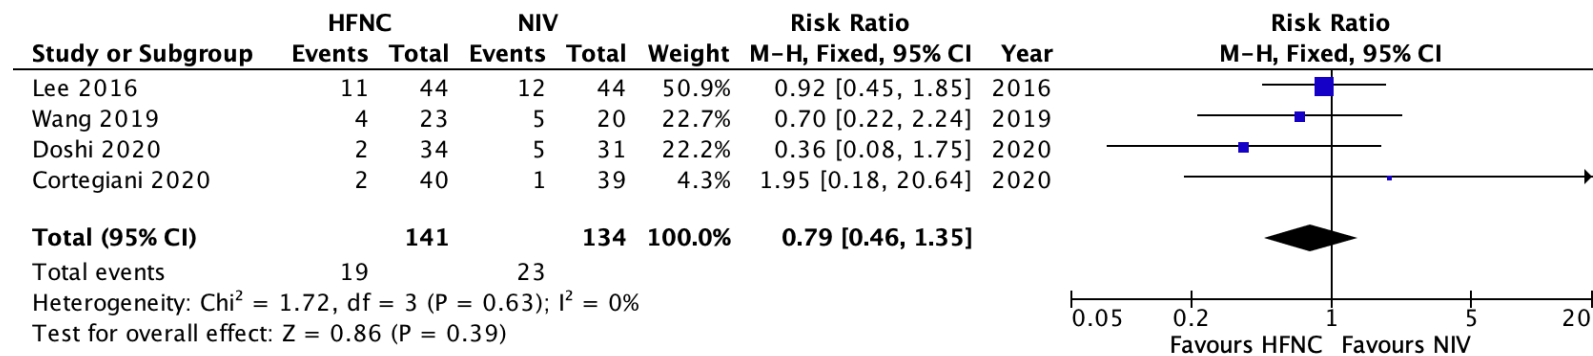



## Recommendation 8: High-flow nasal cannula (HFNC) vs. non-invasive ventilation (NIV) in hypercapnic respiratory failure

### 3. ICU length of stay

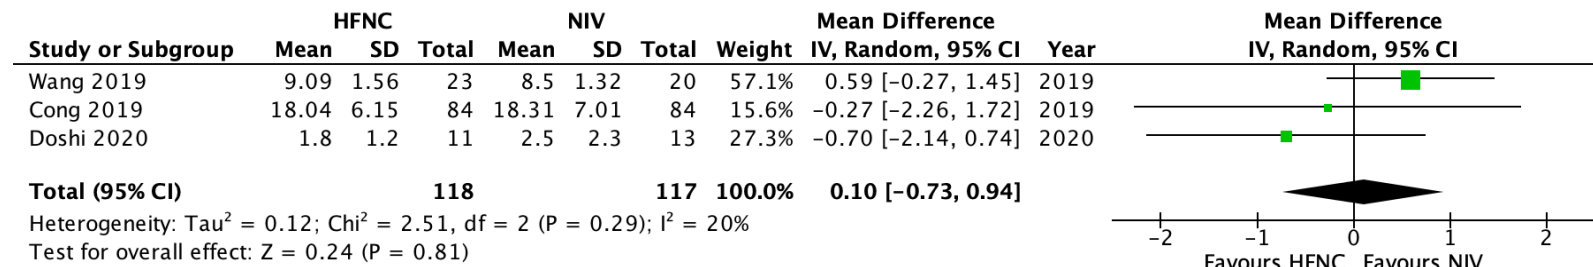

### 4. Hospital length of stay

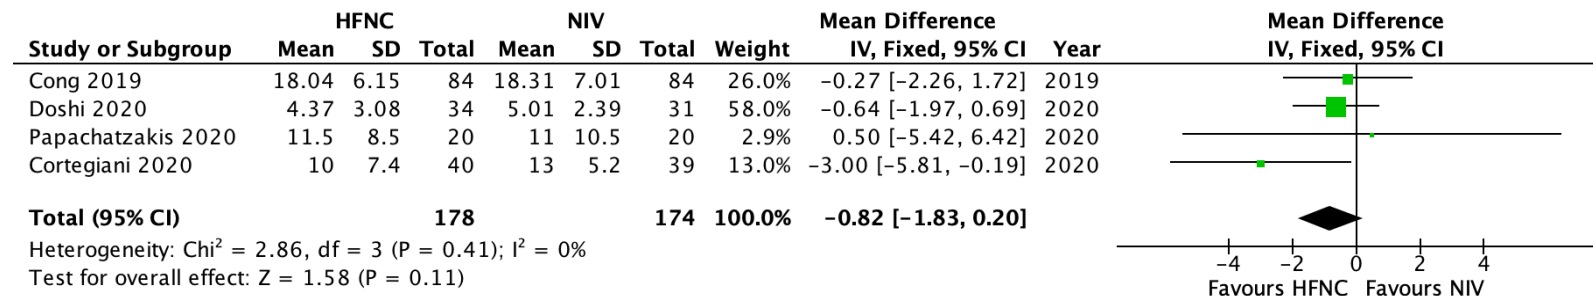

### 5. Comfort

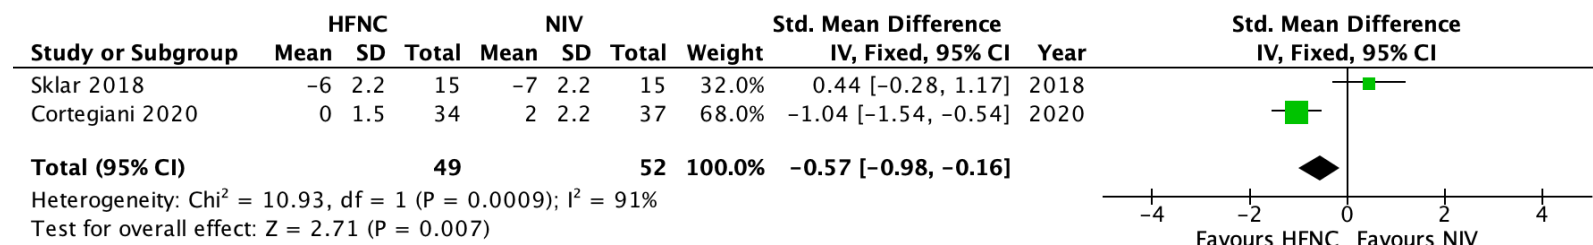

## Recommendation 8: High-flow nasal cannula (HFNC) vs. non-invasive ventilation (NIV) in hypercapnic respiratory failure

### 6. Dyspnea

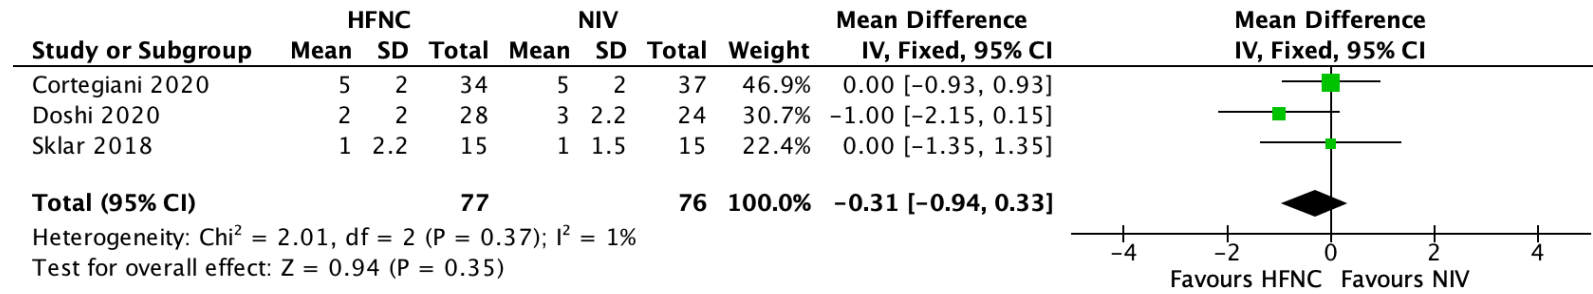

### 7. PaO<sub>2</sub>/FiO<sub>2</sub>

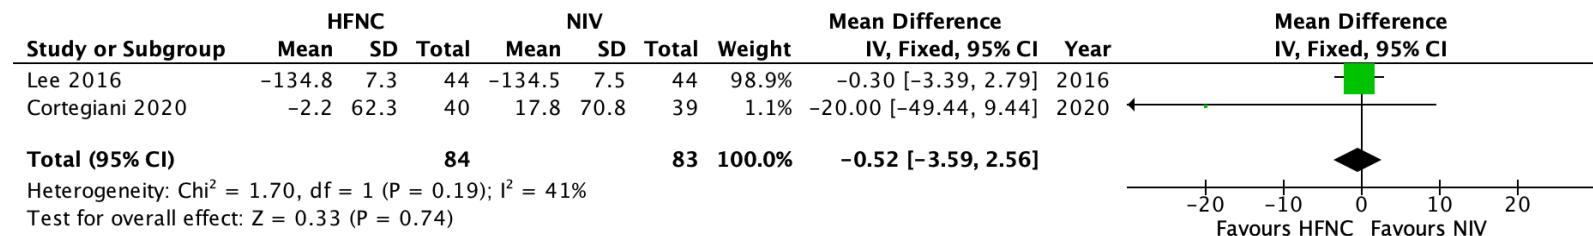

### 8. PO<sub>2</sub>

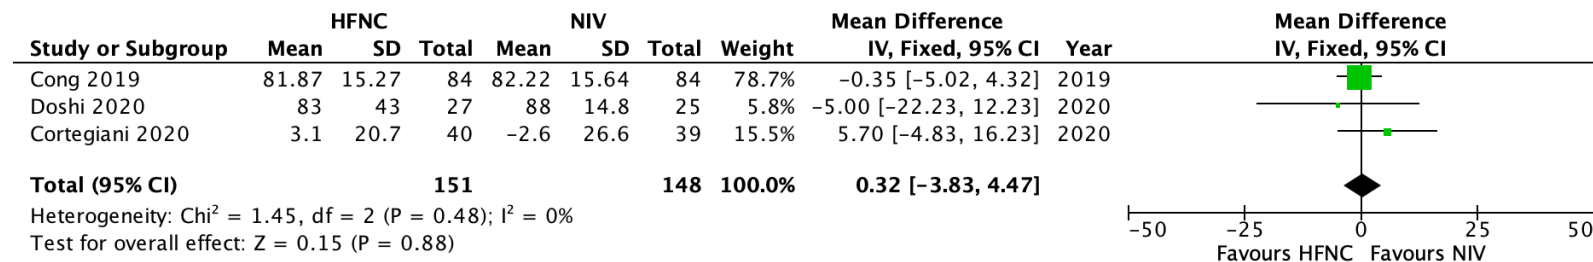

## Recommendation 8: High-flow nasal cannula (HFNC) vs. non-invasive ventilation (NIV) in hypercapnic respiratory failure

### 9. PCO<sub>2</sub>

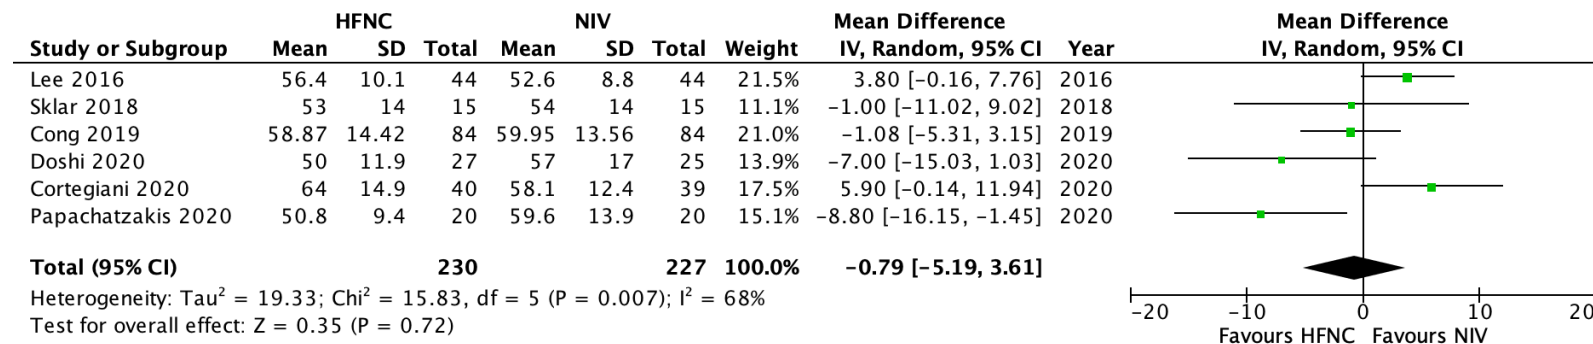

### 10. Respiratory rate

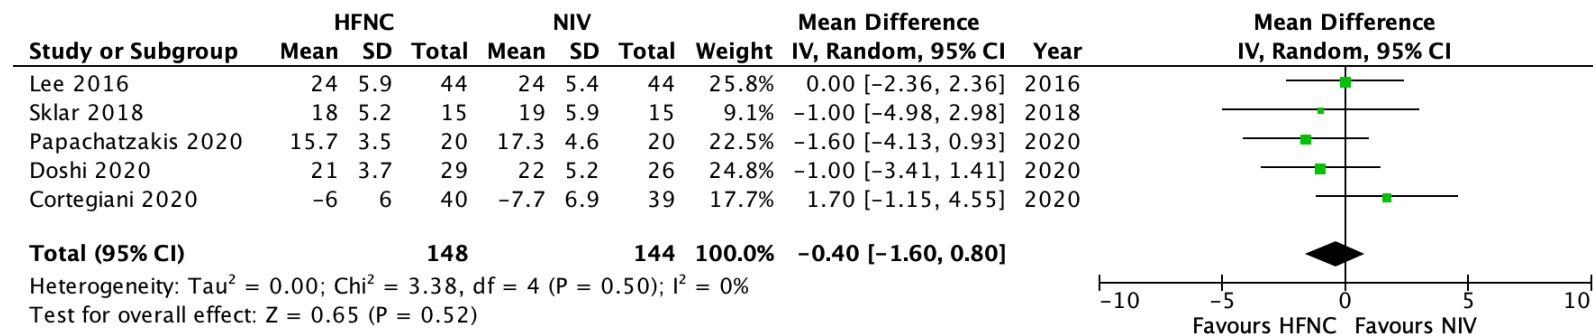

## References

1. Chidekel A, Zhu Y, Wang J, et al. The effects of gas humidification with high-flow nasal cannula on cultured human airway epithelial cells. *Pulm Med* 2012; 2012: 380686.
2. Renda T, Corrado A, Iskandar G, et al. High-flow nasal oxygen therapy in intensive care and anaesthesia. *Br J Anaesth* 2018; 120: 18–27.
3. Pisani L, Astuto M, Prediletto I, et al. High flow through nasal cannula in exacerbated COPD patients: a systematic review. *Pulmonology* 2019; 25: 348–354.
4. Ricard J-D, Roca O, Lemiale V, et al. Use of nasal high flow oxygen during acute respiratory failure. *Intensive Care Med* 2020; 46: 2238–2247.
5. Kang BJ, Koh Y, Lim C-M, et al. Failure of high-flow nasal cannula therapy may delay intubation and increase mortality. *Intensive Care Med* 2015; 41: 623–632.
6. Schünemann H, Brożek J, Guyatt G, et al. GRADE Handbook. Version 3.2. 2008. <https://gdt.gradeapro.org/app/handbook/handbook.html> Date last updated: October 2013.
7. Guyatt GH, Oxman AD, Santesso N, et al. GRADE guidelines: 12. Preparing summary of findings tables – binary outcomes. *J Clin Epidemiol* 2013; 66: 158–172.
8. Guyatt GH, Thorlund K, Oxman AD, et al. GRADE guidelines: 13. Preparing summary of findings tables and evidence profiles – continuous outcomes. *J Clin Epidemiol* 2013; 66: 173–183.
9. Balshem H, Helfand M, Schünemann HJ, et al. GRADE guidelines: 3. Rating the quality of evidence. *J Clin Epidemiol* 2011; 64: 401–406.
10. Guyatt GH, Oxman AD, Vist G, et al. GRADE guidelines: 4. Rating the quality of evidence – study limitations (risk of bias). *J Clin Epidemiol* 2011; 64: 407–415.
11. Guyatt GH, Oxman AD, Kunz R, et al. GRADE guidelines: 7. Rating the quality of evidence – inconsistency. *J Clin Epidemiol* 2011; 64: 1294–1302.
12. Guyatt GH, Oxman AD, Kunz R, et al. GRADE guidelines: 8. Rating the quality of evidence – indirectness. *J Clin Epidemiol* 2011; 64: 1303–1310.
13. Guyatt GH, Oxman AD, Kunz R, et al. GRADE guidelines 6. Rating the quality of evidence – imprecision. *J Clin Epidemiol* 2011; 64: 1283–1293.
14. Guyatt GH, Oxman AD, Montori V, et al. GRADE guidelines: 5. Rating the quality of evidence – publication bias. *J Clin Epidemiol* 2011; 64: 1277–1282.
15. Guyatt GH, Oxman AD, Kunz R, et al. GRADE guidelines: 2. Framing the question and deciding on important outcomes. *J Clin Epidemiol* 2011; 64: 395–400.
16. Andrews JC, Schünemann HJ, Oxman AD, et al. GRADE guidelines: 15. Going from evidence to recommendation – determinants of a recommendation’s direction and strength. *J Clin Epidemiol* 2013; 66: 726–735.

17. Andrews J, Guyatt G, Oxman AD, et al. GRADE guidelines: 14. Going from evidence to recommendations: the significance and presentation of recommendations. *J Clin Epidemiol* 2013; 66: 719–725.
18. Matthay MA, Thompson BT, Ware LB. The Berlin definition of acute respiratory distress syndrome: should patients receiving high-flow nasal oxygen be included? *Lancet Respir Med* 2021; 9: 933–936.
19. Scala R, Heunks L. Highlights in acute respiratory failure. *Eur Respir Rev* 2018; 27: 180008.
20. Rochwerg B, Brochard L, Elliott MW, et al. Official ERS/ATS clinical practice guidelines: noninvasive ventilation for acute respiratory failure. *Eur Respir J* 2017; 50: 1602426.
21. Brochard L, Slutsky A, Pesenti A. Mechanical ventilation to minimize progression of lung injury in acute respiratory failure. *Am J Respir Crit Care Med* 2017; 195: 438–442.
22. Yoshida T, Grieco DL, Brochard L, et al. Patient self-inflicted lung injury and positive end-expiratory pressure for safe spontaneous breathing. *Curr Opin Crit Care* 2020; 26: 59–65.
23. Papazian L, Corley A, Hess D, et al. Use of high-flow nasal cannula oxygenation in ICU adults: a narrative review. *Intensive Care Med* 2016; 42: 1336–1349.
24. Mauri T, Turrini C, Eronia N, et al. Physiologic effects of high-flow nasal cannula in acute hypoxemic respiratory failure. *Am J Respir Crit Care Med* 2017; 195: 1207–1215.
25. Cortegiani A, Crimi C, Noto A, et al. Effect of high-flow nasal therapy on dyspnea, comfort, and respiratory rate. *Crit Care* 2019; 23: 201.
26. Azoulay E, Pickkers P, Soares M, et al. Acute hypoxemic respiratory failure in immunocompromised patients: the Efraim multinational prospective cohort study. *Intensive Care Med* 2017; 43: 1808–1819.
27. Frat J-P, Coudroy R, Marjanovic N, et al. High-flow nasal oxygen therapy and noninvasive ventilation in the management of acute hypoxemic respiratory failure. *Ann Transl Med* 2017; 5: 297.
28. Parke RL, McGuinness SP, Eccleston ML. A preliminary randomized controlled trial to assess effectiveness of nasal high-flow oxygen in intensive care patients. *Respir Care* 2011; 56: 265–270.
29. Bell N, Hutchinson CL, Green TC, et al. Randomised control trial of humidified high flow nasal cannulae versus standard oxygen in the emergency department. *Emerg Med Australas* 2015; 27: 537–541.
30. Frat JP, Thille AW, Mercat A, et al. High-flow oxygen through nasal cannula in acute hypoxemic respiratory failure. *N Engl J Med* 2015; 372: 2185–2196.
31. Lemiale V, Mokart D, Mayaux J, et al. The effects of a 2-h trial of high-flow oxygen by nasal cannula versus Venturi mask in immunocompromised patients with

- hypoxemic acute respiratory failure: a multicenter randomized trial. *Crit Care* 2015; 19: 380.
32. Rittayamai N, Tscheikuna J, Praphruetkit N, et al. Use of high-flow nasal cannula for acute dyspnea and hypoxemia in the emergency department. *Respir Care* 2015; 60: 1377–1382.
  33. Jones PG, Kamona S, Doran O, et al. Randomized controlled trial of humidified high-flow nasal oxygen for acute respiratory distress in the emergency department: the HOT-ER Study. *Respir Care* 2016; 61: 291–299.
  34. Makdee O, Monsomboon A, Surabenjawong U, et al. High-flow nasal cannula versus conventional oxygen therapy in emergency department patients with cardiogenic pulmonary edema: a randomized controlled trial. *Ann Emerg Med* 2017; 70: 465–472.
  35. Azoulay E, Lemiale V, Mokart D, et al. Effect of high-flow nasal oxygen vs standard oxygen on 28-day mortality in immunocompromised patients with acute respiratory failure: the HIGH randomized clinical trial. *JAMA* 2018; 320: 2099–2107.
  36. Raeisi S, Fakharian A, Ghorbani F, et al. Value and safety of high flow oxygenation in the treatment of inpatient asthma: a randomized, double-blind, pilot study. *Iran J Allergy Asthma Immunol* 2019; 18: 615–623.
  37. Geng W, Batu W, You S, et al. High-flow nasal cannula: a promising oxygen therapy for patients with severe bronchial asthma complicated with respiratory failure. *Can Respir J* 2020; 2020: 2301712.
  38. Ko DR, Beom J, Lee HS, et al. Benefits of high-flow nasal cannula therapy for acute pulmonary edema in patients with heart failure in the emergency department: a prospective multi-center randomized controlled trial. *J Clin Med* 2020; 9: 1937.
  39. Nö AM, Temel Ş, Yüksel R, et al. The use of high-flow nasal oxygen vs. standard oxygen therapy in hematological malignancy patients with acute respiratory failure in hematology wards. *Turkish J Med Sci* 2021; 51: 1756–1763.
  40. Cuquemelle E, Pham T, Louis B, et al. Heated and humidified high flow oxygen therapy reduces discomfort during hypoxemic respiratory failure. *Intensive Care Med* 2011; 37: S190.
  41. Schwabbauer N, Berg B, Blumenstock G, et al. Nasal high-flow oxygen therapy in patients with hypoxic respiratory failure: effect on functional and subjective respiratory parameters compared to conventional oxygen therapy and non-invasive ventilation (NIV). *BMC Anesthesiol* 2014; 14: 66.
  42. Ruangsomboon O, Dorongthom T, Chakorn T, et al. High-flow nasal cannula versus conventional oxygen therapy in relieving dyspnea in emergency palliative patients with do-not-intubate status: a randomized crossover study. *Ann Emerg Med* 2019; 75: 615–626.
  43. Bos LD, Artigas A, Constantin J-M, et al. Precision medicine in acute respiratory distress syndrome: workshop report and recommendations for future research. *Eur Respir Rev* 2021; 30: 200317.

44. Renda T, Scala R, Corrado A, et al. Adult pulmonary intensive and intermediate care units: the Italian Thoracic Society (ITS-AIPO) position paper. *Respiration* 2021; 100: 1027–1037.
45. Jahagirdar D, Picheca L. Heated Humidified High Flow Oxygen for Respiratory Support: a Review of Clinical Effectiveness, Cost-Effectiveness, and Guidelines. 2019. <https://www.ncbi.nlm.nih.gov/books/NBK544686/>
46. Attaway AH, Scheraga RG, Bhimraj A, et al. Severe covid-19 pneumonia: pathogenesis and clinical management. *BMJ* 2021; 372: n436.
47. Agarwal A, Basmaji J, Muttalib F, et al. High-flow nasal cannula for acute hypoxemic respiratory failure in patients with COVID-19: systematic reviews of effectiveness and its risks of aerosolization, dispersion, and infection transmission. *Can J Anesth* 2020; 67: 1217–1248.
48. Ferioli M, Cisternino C, Leo V, et al. Protecting healthcare workers from SARS-CoV-2 infection: practical indications. *Eur Respir Rev* 2020; 29: 200068.
49. Franco C, Facciolongo N, Tonelli R, et al. Feasibility and clinical impact of out-of-ICU noninvasive respiratory support in patients with COVID-19-related pneumonia. *Eur Respir J* 2020; 56: 2002130.
50. Winck J, Scala R. Non-invasive respiratory support paths in hospitalized patients with COVID-19: proposal of an algorithm. *Pulmonology* 2021; 27: 305–312.
51. Ding L, Wang L, Ma W, et al. Efficacy and safety of early prone positioning combined with HFNC or NIV in moderate to severe ARDS: a multi-center prospective cohort study. *Crit Care* 2020; 24: 28.
52. Ibarra-Estrada MÁ, Marín-Rosales M, García-Salcido R, et al. Prone positioning in non-intubated patients with COVID-19 associated acute respiratory failure, the PRO-CARF trial: a structured summary of a study protocol for a randomised controlled trial. *Trials* 2020; 21: 940.
53. Al-Hazzani W. Awake prone position in hypoxemic patients with coronavirus disease 19 (COVI-PRONE): a randomized clinical trial (COVI-PRONE). 2021. ClinicalTrials.Gov identifier NCT04350723.
54. Garcia MA, Rampon GL, Doros G, et al. Rationale and design of the awake prone position for early hypoxemia in COVID-19 study protocol: a clinical trial. *Ann Am Thorac Soc* 2021; 18: 1560–1566.
55. Grieco DL, Menga LS, Eleuteri D, et al. Patient self-inflicted lung injury: implications for acute hypoxemic respiratory failure and ARDS patients on non-invasive support. *Minerva Anesthesiol* 2019; 85: 1014–1023.
56. Bellani G, Laffey JG, Pham T, et al. Noninvasive ventilation of patients with acute respiratory distress syndrome. Insights from the LUNG SAFE study. *Am J Respir Crit Care Med* 2017; 195: 67–77.
57. Carteaux G, Millán-Guilarte T, De Prost N, et al. Failure of noninvasive ventilation for de novo acute hypoxemic respiratory failure: role of tidal volume. *Crit Care Med* 2016; 44: 282–290.



58. Frat JP, Ragot S, Coudroy R, et al. Predictors of intubation in patients with acute hypoxemic respiratory failure treated with a noninvasive oxygenation strategy. *Crit Care Med* 2018; 46: 208–215.
59. Patel BK, Kress JP. The changing landscape of noninvasive ventilation in the intensive care unit. *JAMA* 2015; 314: 1697–1699.
60. Ferreyro BL, Angriman F, Munshi L, et al. Association of noninvasive oxygenation strategies with all-cause mortality in adults with acute hypoxemic respiratory failure: a systematic review and meta-analysis. *JAMA* 2020; 324: 57–67.
61. Azevedo JR, Montenegro WS, Leitao AL, et al. High flow nasal cannula oxygen (HFNC) versus non-invasive positive pressure ventilation (NIPPV) in acute hypoxemic respiratory failure. A pilot randomized controlled trial. *Intensive Care Med Exp* 2015; 3: Suppl. 1, A166.
62. Doshi P, Whittle JS, Bublewicz M, et al. High-velocity nasal insufflation in the treatment of respiratory failure: a randomized clinical trial. *Ann Emerg Med* 2018; 72: 73–83.
63. Shebl E, Embarak S. High-flow nasal oxygen therapy versus noninvasive ventilation in chronic interstitial lung disease patients with acute respiratory failure. *Egypt J Chest Dis Tuberculosis* 2018; 67: 270–275.
64. Adi O, Kai Fei S, Azma Haryaty A, et al. Preliminary report: a randomized controlled trial comparing helmet continuous positive airway pressure (CPAP) vs high flow nasal cannula (HFNC) for treatment of acute cardiogenic pulmonary oedema in the emergency department. *Critical Care* 2019; 23: Suppl. 2, P340.
65. Artaud-Macari E, Bubenheim M, Le Bouar G, et al. High-flow oxygen therapy vs non invasive ventilation – a prospective cross-over physiological study of alveolar recruitment in acute respiratory failure. *Ann Intensive Care* 2019; 9: Suppl. 1, CO-27.
66. Grieco DL, Menga LS, Raggi V, et al. Physiological comparison of high-flow nasal cannula and helmet noninvasive ventilation in acute hypoxemic respiratory failure. *Am J Respir Crit Care Med* 2020; 201: 303–312.
67. Patel BK, Wolfe KS, Pohlman AS, et al. Effect of noninvasive ventilation delivered by helmet vs face mask on the rate of endotracheal intubation in patients with acute respiratory distress syndrome: a randomized clinical trial. *JAMA* 2016; 315: 2435–2441.
68. Grieco DL, Menga LS, Cesarano M, et al. Effect of helmet noninvasive ventilation vs high-flow nasal oxygen on days free of respiratory support in patients with COVID-19 and moderate to severe hypoxemic respiratory failure: the HENIVOT randomized clinical trial. *JAMA* 2021; 325: 1731–1743.
69. Frat JP, Brugiere B, Ragot S, et al. Sequential application of oxygen therapy via high-flow nasal cannula and noninvasive ventilation in acute respiratory failure: an observational pilot study. *Respir Care* 2015; 60: 170–178.



70. Spoletini G, Mega C, Pisani L, et al. High-flow nasal therapy vs standard oxygen during breaks off noninvasive ventilation for acute respiratory failure: a pilot randomized controlled trial. *J Crit Care* 2018; 48: 418–425.
71. Jammer I, Wickboldt N, Sander M, et al. Standards for definitions and use of outcome measures for clinical effectiveness research in perioperative medicine: European Perioperative Clinical Outcome (EPCO) definitions: a statement from the ESA-ESICM joint taskforce on perioperative outcome measures. *Eur J Anaesthesiol* 2015; 32: 88–105.
72. O’Gara B, Talmor D. Perioperative lung protective ventilation. *BMJ* 2018; 362: k3030.
73. Odor PM, Bampoe S, Gilhooly D, et al. Perioperative interventions for prevention of postoperative pulmonary complications: systematic review and meta-analysis. *BMJ* 2020; 368: m540.
74. Leone M, Einav S, Chiumello D, et al. Noninvasive respiratory support in the hypoxaemic peri-operative/periprocedural patient: a joint ESA/ESICM guideline. *Intensive Care Med* 2020; 46: 697–713.
75. Stéphan F, Barrucand B, Petit P, et al. High-flow nasal oxygen vs noninvasive positive airway pressure in hypoxemic patients after cardiothoracic surgery: a randomized clinical trial. *JAMA* 2015; 313: 2331–2339.
76. Hernández G, Vaquero C, Colinas L, et al. Effect of postextubation high-flow nasal cannula vs noninvasive ventilation on reintubation and postextubation respiratory failure in high-risk patients: a randomized clinical trial. *JAMA* 2016; 316: 1565–1574.
77. Yu Y, Qian X, Liu C, et al. Effect of high-flow nasal cannula versus conventional oxygen therapy for patients with thoracoscopic lobectomy after extubation. *Can Respir J* 2017; 2017: 7894631.
78. Xia M, Li W, Yao J, et al. A postoperative comparison of high-flow nasal cannula therapy and conventional oxygen therapy for esophageal cancer patients. *Ann Palliat Med* 2021; 10: 2530–2539.
79. D’Cruz RF, Hart N, Kaltsakas G. High-flow therapy: physiological effects and clinical applications. *Breathe* 2020; 16: 200224.
80. Parke R, McGuinness S, Dixon R, et al. Open-label, phase II study of routine high-flow nasal oxygen therapy in cardiac surgical patients. *Br J Anaesth* 2013; 111: 925–931.
81. Corley A, Bull T, Spooner AJ, et al. Direct extubation onto high-flow nasal cannulae post-cardiac surgery versus standard treatment in patients with a BMI  $\geq 30$ : a randomised controlled trial. *Intensive Care Med* 2015; 41: 887–894.
82. Ansari BM, Hogan MP, Collier TJ, et al. A randomized controlled trial of high-flow nasal oxygen (Optiflow) as part of an enhanced recovery program after lung resection surgery. *Ann Thorac Surg* 2016; 101: 459–464.
83. Futier E, Paugam-Burtz C, Godet T, et al. Effect of early postextubation high-flow nasal cannula vs conventional oxygen therapy on hypoxaemia in patients after

major abdominal surgery: a French multicentre randomised controlled trial (OPERA). *Intensive Care Med* 2016; 42: 1888–1898.

84. Blandszun G, Zochios V, Butchart A, et al. A randomised controlled trial of high-flow nasal oxygen (Optiflow™) in high-risk cardiac surgical patients. *Anaesthesia* 2017; 72: Suppl. 4, 15.
85. Brainard J, Scott BK, Sullivan BL, et al. Heated humidified high-flow nasal cannula oxygen after thoracic surgery – a randomized prospective clinical pilot trial. *J Crit Care* 2017; 40: 225–228.
86. Sahin M, El H, Akkoç I. Comparison of mask oxygen therapy and high-flow oxygen therapy after cardiopulmonary bypass in obese patients. *Can Respir J* 2018; 2018: 1039635.
87. Zochios V, Collier T, Blandszun G, et al. The effect of high-flow nasal oxygen on hospital length of stay in cardiac surgical patients at high risk for respiratory complications: a randomised controlled trial. *Anaesthesia* 2018; 73: 1478–1488.
88. Ferrando C, Puig J, Serralta F, et al. High-flow nasal cannula oxygenation reduces postoperative hypoxemia in morbidly obese patients: a randomized controlled trial. *Minerva Anestesiol* 2019; 85: 1062–1070.
89. Pennisi MA, Bello G, Congedo MT, et al. Early nasal high-flow versus Venturi mask oxygen therapy after lung resection: a randomized trial. *Crit Care* 2019; 23: 68.
90. Twose P, Thomas C, Morgan M, et al. Comparison of high-flow oxygen therapy with standard oxygen therapy for prevention of postoperative pulmonary complications after major head and neck surgery involving insertion of a tracheostomy: a feasibility study. *Br J Oral Maxillofac Surg* 2019; 57: 1014–1018.
91. Tatsuishi W, Sato T, Kataoka G, et al. High-flow nasal cannula therapy with early extubation for subjects undergoing off-pump coronary artery bypass graft surgery. *Respir Care* 2020; 65: 183–190.
92. Vourc'h M, Nicolet J, Volteau C, et al. High-flow therapy by nasal cannulae versus high-flow face mask in severe hypoxemia after cardiac surgery: a single-center randomized controlled study – the HEART FLOW study. *J Cardiothorac Vasc Anesth* 2020; 34: 157–165.
93. Stéphan F, Bérard L, Rézaiguia-Delclaux S, et al. High-flow nasal cannula therapy versus intermittent noninvasive ventilation in obese subjects after cardiothoracic surgery. *Respir Care* 2017; 62: 1193–1202.
94. Esteban A, Frutos-Vivar F, Muriel A, et al. Evolution of mortality over time in patients receiving mechanical ventilation. *Am J Respir Crit Care Med* 2013; 188: 220–230.
95. Miu T, Joffe AM, Yanez ND, et al. Predictors of reintubation in critically ill patients. *Respir Care* 2014; 59: 178–185.
96. Tiruvoipati R, Lewis D, Haji K, et al. High-flow nasal oxygen vs high-flow face mask: a randomized crossover trial in extubated patients. *J Crit Care* 2010; 25: 463–468.

97. Maggiore SM, Idone FA, Vaschetto R, et al. Nasal high-flow versus Venturi mask oxygen therapy after extubation. Effects on oxygenation, comfort, and clinical outcome. *Am J Respir Crit Care Med* 2014; 190: 282–288.
98. Perbet S, Gerst A, Chabanne R, et al. High-flow nasal oxygen cannula versus conventional oxygen therapy to prevent postextubation lung aeration loss: a multicentric randomized control lung ultrasound study. *Intensive Care Med* 2014; 40: S128.
99. Rittayamai N, Tscheikuna J, Rujiwit P. High-flow nasal cannula versus conventional oxygen therapy after endotracheal extubation: a randomized crossover physiologic study. *Respir Care* 2014; 59: 485–490.
100. Hernández G, Vaquero C, González P, et al. Effect of postextubation high-flow nasal cannula vs conventional oxygen therapy on reintubation in low-risk patients: a randomized clinical trial. *JAMA* 2016; 315: 1354–1361.
101. Arman PD, Varn MN, Povian S, et al. Effects of direct extubation to high-flow nasal cannula compared to standard nasal cannula in patients in the intensive care unit. *Am J Respir Crit Care Med* 2017; 195: A1887.
102. Fernandez R, Subira C, Frutos-Vivar F, et al. High-flow nasal cannula to prevent postextubation respiratory failure in high-risk non-hypercapnic patients: a randomized multicenter trial. *Ann Intensive Care* 2017; 7: 47.
103. Song HZ, Gu JX, Xiu HQ, et al. The value of high-flow nasal cannula oxygen therapy after extubation in patients with acute respiratory failure. *Clinics* 2017; 72: 562–567.
104. Di Mussi R, Spadaro S, Stripoli T, et al. High-flow nasal cannula oxygen therapy decreases postextubation neuroventilatory drive and work of breathing in patients with chronic obstructive pulmonary disease. *Crit Care* 2018; 22: 180.
105. Cho JY, Kim H-S, Kang H, et al. Comparison of postextubation outcomes associated with high-flow nasal cannula vs. conventional oxygen therapy in patients at high risk of reintubation: a randomized clinical trial. *J Korean Med Sci* 2020; 35: e194.
106. Hu TY, Lee CH, Cheng KH, et al. Effect of high-flow nasal oxygen vs. conventional oxygen therapy on extubation outcomes and physiologic changes for patients with high risk of extubation failure in the medical ICU: a tertiary center, randomized, controlled trial. *Int J Gerontol* 2020; 14: 36–41.
107. Matsuda W, Hagiwara A, Uemura T, et al. High-flow nasal cannula may not reduce the re-intubation rate after extubation in respiratory failure compared with a large-volume nebulization-based humidifier. *Respir Care* 2020; 65: 610–617.
108. Eaton Turner E, Jenks M. Cost-effectiveness analysis of the use of high-flow oxygen through nasal cannula in intensive care units in NHS England. *Expert Rev Pharmacoecon Outcomes Res* 2018; 18: 331–337.
109. Maggiore SM, Battilana M, Serano L, et al. Ventilatory support after extubation in critically ill patients. *Lancet Respir Med* 2018; 6: 948–962.

110. Theerawit P, Natpobsuk N, Sutherasan Y. The efficacy of the Whisperflow CPAP system versus high flow nasal cannula in patients at high risk for postextubation failure. *Intens Care Med* 2017; 5: Suppl. 2: 0407.
111. Zhang JC, Wu FX, Meng LL, et al. [A study on the effects and safety of sequential humidified high flow nasal cannula oxygenation therapy on the COPD patients after extubation]. *Zhonghua Yi Xue Za Zhi* 2018; 98: 109–112.
112. Jing G, Li J, Hao D, et al. Comparison of high flow nasal cannula with noninvasive ventilation in chronic obstructive pulmonary disease patients with hypercapnia in preventing postextubation respiratory failure: a pilot randomized controlled trial. *Res Nurs Health* 2019; 42: 217–225.
113. Thille AW, Muller G, Gacouin A, et al. Effect of postextubation high-flow nasal oxygen with noninvasive ventilation vs high-flow nasal oxygen alone on reintubation among patients at high risk of extubation failure: a randomized clinical trial. *JAMA* 2019; 322: 1465–1475.
114. Tseng CW, Chao KY, Chiang CE, et al. The efficacy of heated humidifier high-flow nasal cannula compared with noninvasive positive-pressure ventilation in prevention of reintubation in patients with prolonged mechanical ventilation. *Eur Respir J* 2019; 54: Suppl. 63, RCT5097.
115. Tan D, Walline JH, Ling B, et al. High-flow nasal cannula oxygen therapy versus non-invasive ventilation for chronic obstructive pulmonary disease patients after extubation: a multicenter, randomized controlled trial. *Crit Care* 2020; 24: 489.
116. Halbert R, Natoli J, Gano A, et al. Global burden of COPD: systematic review and meta-analysis. *Eur Respir J* 2006; 28: 523–532.
117. Vogelmeier CF, Criner GJ, Martinez FJ, et al. Global strategy for the diagnosis, management, and prevention of chronic obstructive lung disease 2017 report. GOLD executive summary. *Am J Respir Crit Care Med* 2017; 195: 557–582.
118. Deenen JC, Horlings CG, Verschuuren JJ, et al. The epidemiology of neuromuscular disorders: a comprehensive overview of the literature. *J Neuromuscul Dis* 2015; 2: 73–85.
119. Bruni A, Garofalo E, Cammarota G, et al. High flow through nasal cannula in stable and exacerbated chronic obstructive pulmonary disease patients. *Rev Recent Clin Trials* 2019; 14: 247–260.
120. Papachatzakis I, Velentza L, Kontogiannis S, et al. High flow nasal cannula with warm humidified air versus non-invasive mechanical ventilation in respiratory failure type II. *Eur Respir J* 2017; 50: Suppl. 61, PA2182.
121. Cong L, Zhou L, Liu H, et al. Outcomes of high-flow nasal cannula versus non-invasive positive pressure ventilation for patients with acute exacerbations of chronic obstructive pulmonary disease. *Int J Clin Exp Med* 2019; 12: 10863–10867.
122. Wang JH, Li Q. Randomized controlled study of HFNC and NPPV in the treatment of AECOPD combined with type II respiratory failure. *Chin J Integr Med* 2019; 39: 945–948.

123. Cortegiani A, Longhini F, Madotto F, et al. High flow nasal therapy versus noninvasive ventilation as initial ventilatory strategy in COPD exacerbation: a multicenter non-inferiority randomized trial. *Crit Care* 2020; 24: 692.
124. Doshi PB, Whittle JS, Dungan G II, et al. The ventilatory effect of high velocity nasal insufflation compared to non-invasive positive-pressure ventilation in the treatment of hypercapneic respiratory failure: a subgroup analysis. *Heart Lung* 2020; 49: 610–615.
125. Sklar MC, Dres M, Ritayamai N, et al. A randomized cross-over physiological study of high flow nasal oxygen cannula versus non-invasive ventilation in adult patients with cystic fibrosis: The HIFEN study. *Int Care Med Exp* 2017; 5: Suppl. 2, 0674.
126. Longhini F, Pisani L, Lungu R, et al. High-flow oxygen therapy after noninvasive ventilation interruption in patients recovering from hypercapnic acute respiratory failure: a physiological crossover trial. *Crit Care Med* 2019; 47: e506–e511.
127. Lee MK, Kim SA, Lee W-Y, et al. The efficacy of high-flow nasal cannulae oxygen therapy in severe acute exacerbation of chronic obstructive pulmonary disease: A randomized controlled trial. *Eur Respir J* 2016; 48: PA3058.
