# Supplementary material
Source: HighWire-hosted journal article supplement (https://erj.ersjournals.com/content/59/4/2101574)
Supplement: inline-supplementary-material-2 [file inline-supplementary-material-2.pdf]

## **Supplement: Evidence to Decision and Voting Results Supplement**

### **ERS Guidelines: High flow nasal cannula in acute respiratory failure**

#### **Authors**

Simon Oczkowski<sup>1,2,\*</sup>, Begüm Ergan<sup>3,\*</sup>, Lieuwe Bos<sup>4,5</sup>, Michelle Chatwin<sup>6</sup>, Miguel Ferrer<sup>7</sup>, Cesare Gregoretti<sup>8,9</sup>, Leo Heunks<sup>10</sup>, Jean-Pierre Frat<sup>11,12</sup>, Federico Longhini<sup>13</sup>, Stefano Nava<sup>14,15</sup>, Paolo Navalesi<sup>16,17</sup>, Aylin Ozsancak Uğurlu<sup>18</sup>, Lara Pisani<sup>14,15</sup>, Teresa Renda<sup>19</sup>, Arnaud W. Thille<sup>11,12</sup>, João Carlos Winck<sup>20</sup>, Wolfram Windisch<sup>21</sup>, Thomy Tonia<sup>22</sup>, Jeanette Boyd<sup>23</sup>, Giovanni Sotgiu<sup>24</sup>, Raffaele Scala<sup>25</sup>

#### **\*co-first authors**

#### **Affiliations**

1. Department of Medicine, Division of Critical Care, McMaster University, Hamilton, Ontario, Canada
2. Department of Health Research Methods, Evidence, and Impact, McMaster University, Hamilton, Ontario, Canada
3. Department of Pulmonary and Critical Care, Dokuz Eylul University School of Medicine, Izmir, Turkey
4. Department of Intensive Care & Laboratory of Experimental Intensive Care and Anesthesiology (LEICA), Amsterdam UMC, location Academic Medical Center, Amsterdam
5. Respiratory Medicine, Amsterdam UMC, location Academic Medical Center, Amsterdam, The Netherlands.
6. Academic and Clinical Department of Sleep and Breathing and NIHR Respiratory Biomedical Research Unit, Royal Brompton & Harefield NHS Foundation Trust, Sydney Street, London, UK.
7. Dept of Pneumology, Respiratory Institute, Hospital Clinic, IDIBAPS, University of Barcelona and CIBERES, Barcelona, Spain.
8. Department of Surgical, Oncological and Oral Science University of Palermo, Palermo, Italy.
9. G.Giglio Institute, Cefalu', Italy
10. Department of Intensive Care Medicine, Amsterdam UMC, Location VUmc, Amsterdam, The Netherlands
11. Centre Hospitalier Universitaire de Poitiers, Médecine Intensive Réanimation, Poitiers, France.
12. INSERM Centre d'Investigation Clinique 1402 ALIVE, Université de Poitiers, Poitiers, France.
13. Anesthesia and Intensive Care Unit, Department of Medical and Surgical Sciences, Magna Graecia University, Catanzaro, Italy
14. Alma Mater Studiorum University of Bologna, Dept of Clinical, Integrated and Experimental Medicine (DIMES), Bologna, Italy
15. IRCCS Azienda Ospedaliero-Universitaria di Bologna, University Hospital Sant'Orsola-Malpighi - Respiratory and Critical Care Unit, Bologna, Italy
16. Anesthesia and Intensive Care, Padua University Hospital, University Hospital, Padua, Italy
17. Department of Medicine -DIMED, University of Padua, Italy
18. Department of Pulmonary Medicine, Baskent University, Istanbul, Turkey.
19. Cardiothoracic and Vascular Department, Respiratory and Critical Care Unit, Careggi University Hospital, Largo Brambilla 3, 50134 Florence, Italy.
20. Faculdade de Medicina da Universidade do Porto, Portugal.
21. Cologne Merheim Hospital, Dept of Pneumology, Kliniken der Stadt Köln, gGmbH, Witten/Herdecke University, Faculty of Health/School of Medicine, Köln, Germany.
22. Institute of Social and Preventive Medicine, University of Bern, Switzerland
23. European Lung Foundation (ELF), Sheffield, United Kingdom
24. Clinical Epidemiology and Medical Statistics Unit, Department of Medical, Surgical, Experimental Sciences, University of Sassari, Sassari, Italy.
25. Pulmonology and Respiratory Intensive Care Unit, Cardio-Thoraco-Neuro-vascular and Metabolic Department, Usl Toscana Sudest, S Donato Hospital, Arezzo, Italy.

| Question 1: Should HFNC or COT be used for acute hypoxic respiratory failure?                                                                                                                                                                                                                                                                                                                                             |                                                             |                                 |                                                                                              |                                                                                   |                          |                                                                             |                     |
|---------------------------------------------------------------------------------------------------------------------------------------------------------------------------------------------------------------------------------------------------------------------------------------------------------------------------------------------------------------------------------------------------------------------------|-------------------------------------------------------------|---------------------------------|----------------------------------------------------------------------------------------------|-----------------------------------------------------------------------------------|--------------------------|-----------------------------------------------------------------------------|---------------------|
| <b>Recommendation:</b><br><i>We suggest the use of HFNC over COT in patients with purely hypoxic respiratory failure. (conditional recommendation, moderate certainty).</i>                                                                                                                                                                                                                                               |                                                             |                                 |                                                                                              |                                                                                   |                          |                                                                             |                     |
| Desirable effects                                                                                                                                                                                                                                                                                                                                                                                                         | Trivial                                                     | Small                           | Moderate                                                                                     | Large                                                                             |                          | Varies                                                                      | Unsure              |
| Undesirable effects                                                                                                                                                                                                                                                                                                                                                                                                       | Large                                                       | Moderate                        | Small                                                                                        | Trivial                                                                           |                          | Varies                                                                      | Unsure              |
| Certainty of evidence of effects                                                                                                                                                                                                                                                                                                                                                                                          | Very low                                                    | Low                             | Moderate                                                                                     | High                                                                              |                          | No included studies                                                         |                     |
| Variability in values                                                                                                                                                                                                                                                                                                                                                                                                     | Important uncertainty or variability                        |                                 | Possibly important uncertainty or variability                                                | Probably no important uncertainty or variability                                  |                          | No important uncertainty or variability                                     |                     |
| Balance of effects                                                                                                                                                                                                                                                                                                                                                                                                        | Favours the comparison                                      | Probably favours the comparison | Does not favour intervention or comparison                                                   | Probably favours the intervention                                                 | Favours the intervention | Varies                                                                      | Unsure              |
| Resources required                                                                                                                                                                                                                                                                                                                                                                                                        | Large costs                                                 | Moderate costs                  | Negligible costs or savings                                                                  | Moderate savings                                                                  | Large savings            | Varies                                                                      | Unsure              |
| Certainty of evidence of required resources                                                                                                                                                                                                                                                                                                                                                                               | Very low                                                    | Low                             | Moderate                                                                                     | High                                                                              |                          | No included studies                                                         |                     |
| Cost effectiveness                                                                                                                                                                                                                                                                                                                                                                                                        | Favours the comparison                                      | Probably favours the comparison | Does not favour intervention or comparison                                                   | Probably favours the intervention                                                 | Favours the intervention | Varies                                                                      | No included studies |
| Equity                                                                                                                                                                                                                                                                                                                                                                                                                    | Reduced                                                     | Probably reduced                | Probably no impact                                                                           | Probably increased                                                                | Increased                | Varies                                                                      | Unsure              |
| Acceptability                                                                                                                                                                                                                                                                                                                                                                                                             | No                                                          | Probably no                     | Probably yes                                                                                 | Yes                                                                               |                          | Varies                                                                      | Unsure              |
| Feasibility                                                                                                                                                                                                                                                                                                                                                                                                               | No                                                          | Probably no                     | Probably yes                                                                                 | Yes                                                                               |                          | Varies                                                                      | Unsure              |
| Recommendation and voting results                                                                                                                                                                                                                                                                                                                                                                                         |                                                             |                                 |                                                                                              |                                                                                   |                          |                                                                             |                     |
| Strong recommendation for comparison over intervention                                                                                                                                                                                                                                                                                                                                                                    | Conditional recommendation for comparison over intervention |                                 | Conditional recommendation for either the intervention or the comparison<br><br>1 votes (5%) | Conditional recommendation for intervention over comparison<br><br>16 votes (84%) |                          | Strong recommendation for intervention over comparison<br><br>2 votes (11%) | No recommendation   |
| Panel comments                                                                                                                                                                                                                                                                                                                                                                                                            |                                                             |                                 |                                                                                              |                                                                                   |                          |                                                                             |                     |
| If there is sufficient monitoring and continuous availability of personel for endotracheal intubation and start mechanical ventilation. The major danger is prolonged HFNO in a patient who's bound to be intubated. Moderate certainty of evidence for critical outcomes (mortality, intubation, escalation to NIV).In addition the balance between desirable and undesirable effects is probably favors to intervention |                                                             |                                 |                                                                                              |                                                                                   |                          |                                                                             |                     |

| Question 2: Should HFNC or NIV be used for acute hypoxic respiratory failure?                                                                                                                                                                                                                                            |                                                             |                                 |                                                                          |                                                             |                          |                                                        |                     |
|--------------------------------------------------------------------------------------------------------------------------------------------------------------------------------------------------------------------------------------------------------------------------------------------------------------------------|-------------------------------------------------------------|---------------------------------|--------------------------------------------------------------------------|-------------------------------------------------------------|--------------------------|--------------------------------------------------------|---------------------|
| <b>Recommendation:</b><br><i>We suggest the use of HFNC over NIV in purely hypoxic respiratory failure. (conditional recommendation, low certainty)</i>                                                                                                                                                                  |                                                             |                                 |                                                                          |                                                             |                          |                                                        |                     |
| Desirable effects                                                                                                                                                                                                                                                                                                        | Trivial                                                     | Small                           | Moderate                                                                 | Large                                                       |                          | Varies                                                 | Don't know          |
| Undesirable effects                                                                                                                                                                                                                                                                                                      | Large                                                       | Moderate                        | Small                                                                    | Trivial                                                     |                          | Varies                                                 | Don't know          |
| Certainty of evidence of effects                                                                                                                                                                                                                                                                                         | Very low                                                    | Low                             | Moderate                                                                 | High                                                        |                          | No included studies                                    |                     |
| Variability in values                                                                                                                                                                                                                                                                                                    | Important uncertainty or variability                        |                                 | Possibly important uncertainty or variability                            | Probably no important uncertainty or variability            |                          | No important uncertainty or variability                |                     |
| Balance of effects                                                                                                                                                                                                                                                                                                       | Favours the comparison                                      | Probably favours the comparison | Does not favour intervention or comparison                               | Probably favours the intervention                           | Favours the intervention | Varies                                                 | Don't know          |
| Resources required                                                                                                                                                                                                                                                                                                       | Large costs                                                 | Moderate costs                  | Negligible costs or savings                                              | Moderate savings                                            | Large savings            | Varies                                                 | Don't know          |
| Certainty of evidence of required resources                                                                                                                                                                                                                                                                              | Very low                                                    | Low                             | Moderate                                                                 | High                                                        |                          | No included studies                                    |                     |
| Cost effectiveness                                                                                                                                                                                                                                                                                                       | Favours the comparison                                      | Probably favours the comparison | Does not favour intervention or comparison                               | Probably favours the intervention                           | Favours the intervention | Varies                                                 | No included studies |
| Equity                                                                                                                                                                                                                                                                                                                   | Reduced                                                     | Probably reduced                | Probably no impact                                                       | Probably increased                                          | Increased                | Varies                                                 | Don't know          |
| Acceptability                                                                                                                                                                                                                                                                                                            | No                                                          | Probably no                     | Probably yes                                                             | Yes                                                         |                          | Varies                                                 | Don't know          |
| Feasibility                                                                                                                                                                                                                                                                                                              | No                                                          | Probably no                     | Probably yes                                                             | Yes                                                         |                          | Varies                                                 | Don't know          |
| Recommendation and voting results                                                                                                                                                                                                                                                                                        |                                                             |                                 |                                                                          |                                                             |                          |                                                        |                     |
| Strong recommendation for comparison over intervention                                                                                                                                                                                                                                                                   | Conditional recommendation for comparison over intervention |                                 | Conditional recommendation for either the intervention or the comparison | Conditional recommendation for intervention over comparison |                          | Strong recommendation for intervention over comparison | No recommendation   |
|                                                                                                                                                                                                                                                                                                                          |                                                             |                                 | 4 votes (21%)                                                            | 13 votes (68%)                                              |                          | 2 votes (11%)                                          |                     |
| Panel comments                                                                                                                                                                                                                                                                                                           |                                                             |                                 |                                                                          |                                                             |                          |                                                        |                     |
| Depends on local expertise and patient tolerability. Limiting to just one approach may be inferior to having both available and trialing which one works best for the individual patient. If a unit needs to start using either; preference for starting to use HFNO.<br>HFNC appears more comfortable, easier to set up |                                                             |                                 |                                                                          |                                                             |                          |                                                        |                     |

| Question 3: Should HFNC or COT be used during breaks from NIV in patients with acute hypoxic respiratory failure?                                                                                                                                           |                                                                                   |                                 |                                                                                                   |                                                                                     |                          |                                                        |                     |
|-------------------------------------------------------------------------------------------------------------------------------------------------------------------------------------------------------------------------------------------------------------|-----------------------------------------------------------------------------------|---------------------------------|---------------------------------------------------------------------------------------------------|-------------------------------------------------------------------------------------|--------------------------|--------------------------------------------------------|---------------------|
| <b>Recommendation:</b><br><i>We suggest the use of HFNC over COT during breaks from NIV in patients with acute hypoxic respiratory failure (conditional recommendation, low certainty)</i>                                                                  |                                                                                   |                                 |                                                                                                   |                                                                                     |                          |                                                        |                     |
| Desirable effects                                                                                                                                                                                                                                           | Trivial                                                                           | Small                           | Moderate                                                                                          | Large                                                                               |                          | Varies                                                 | Don't know          |
| Undesirable effects                                                                                                                                                                                                                                         | Large                                                                             | Moderate                        | Small                                                                                             | Trivial                                                                             |                          | Varies                                                 | Don't know          |
| Certainty of evidence of effects                                                                                                                                                                                                                            | Very low                                                                          | Low                             | Moderate                                                                                          | High                                                                                |                          | No included studies                                    |                     |
| Variability in values                                                                                                                                                                                                                                       | Important uncertainty or variability                                              |                                 | Possibly important uncertainty or variability                                                     | Probably no important uncertainty or variability                                    |                          | No important uncertainty or variability                |                     |
| Balance of effects                                                                                                                                                                                                                                          | Favours the comparison                                                            | Probably favours the comparison | Does not favour intervention or comparison                                                        | Probably favours the intervention                                                   | Favours the intervention | Varies                                                 | Don't know          |
| Resources required                                                                                                                                                                                                                                          | Large costs                                                                       | Moderate costs                  | Negligible costs or savings                                                                       | Moderate savings                                                                    | Large savings            | Varies                                                 | Don't know          |
| Certainty of evidence of required resources                                                                                                                                                                                                                 | Very low                                                                          | Low                             | Moderate                                                                                          | High                                                                                |                          | No included studies                                    |                     |
| Cost effectiveness                                                                                                                                                                                                                                          | Favours the comparison                                                            | Probably favours the comparison | Does not favour intervention or comparison                                                        | Probably favours the intervention                                                   | Favours the intervention | Varies                                                 | No included studies |
| Equity                                                                                                                                                                                                                                                      | Reduced                                                                           | Probably reduced                | Probably no impact                                                                                | Probably increased                                                                  | Increased                | Varies                                                 | Don't know          |
| Acceptability                                                                                                                                                                                                                                               | No                                                                                | Probably no                     | Probably yes                                                                                      | Yes                                                                                 |                          | Varies                                                 | Don't know          |
| Feasibility                                                                                                                                                                                                                                                 | No                                                                                | Probably no                     | Probably yes                                                                                      | Yes                                                                                 |                          | Varies                                                 | Don't know          |
| Recommendation and voting results                                                                                                                                                                                                                           |                                                                                   |                                 |                                                                                                   |                                                                                     |                          |                                                        |                     |
| Strong recommendation for comparison over intervention                                                                                                                                                                                                      | Conditional recommendation for comparison over intervention<br><b>1 vote (5%)</b> |                                 | Conditional recommendation for either the intervention or the comparison<br><b>14 votes (74%)</b> | Conditional recommendation for intervention over comparison<br><b>4 votes (21%)</b> |                          | Strong recommendation for intervention over comparison | No recommendation   |
| Panel comments                                                                                                                                                                                                                                              |                                                                                   |                                 |                                                                                                   |                                                                                     |                          |                                                        |                     |
| It seems reasonable to use HFNC vs COT during breaks of NIV in patients with high inspiratory demand or whose hypoxemia is highly dependent on alveolar collapse, but makes sense given results of Q1<br>It based on only one study with no strong results. |                                                                                   |                                 |                                                                                                   |                                                                                     |                          |                                                        |                     |

| Question 4: Should HFNC or COT be used in postoperative patients?                                                                                                                                                                                                                                                                                                                                                                                                               |                                                                                   |                                 |                                                                                                   |                                                                                     |                          |                                                        |                     |
|---------------------------------------------------------------------------------------------------------------------------------------------------------------------------------------------------------------------------------------------------------------------------------------------------------------------------------------------------------------------------------------------------------------------------------------------------------------------------------|-----------------------------------------------------------------------------------|---------------------------------|---------------------------------------------------------------------------------------------------|-------------------------------------------------------------------------------------|--------------------------|--------------------------------------------------------|---------------------|
| <b>Recommendation:</b><br><i>We suggest that either HFNC or COT are appropriate to use in postoperative patients at low risk of respiratory complications. (conditional recommendation, low certainty)</i>                                                                                                                                                                                                                                                                      |                                                                                   |                                 |                                                                                                   |                                                                                     |                          |                                                        |                     |
| Desirable effects                                                                                                                                                                                                                                                                                                                                                                                                                                                               | Trivial                                                                           | Small                           | Moderate                                                                                          | Large                                                                               |                          | Varies                                                 | Don't know          |
| Undesirable effects                                                                                                                                                                                                                                                                                                                                                                                                                                                             | Large                                                                             | Moderate                        | Small                                                                                             | Trivial                                                                             |                          | Varies                                                 | Don't know          |
| Certainty of evidence of effects                                                                                                                                                                                                                                                                                                                                                                                                                                                | Very low                                                                          | Low                             | Moderate                                                                                          | High                                                                                |                          | No included studies                                    |                     |
| Variability in values                                                                                                                                                                                                                                                                                                                                                                                                                                                           | Important uncertainty or variability                                              |                                 | Possibly important uncertainty or variability                                                     | Probably no important uncertainty or variability                                    |                          | No important uncertainty or variability                |                     |
| Balance of effects                                                                                                                                                                                                                                                                                                                                                                                                                                                              | Favours the comparison                                                            | Probably favours the comparison | Does not favour intervention or comparison                                                        | Probably favours the intervention                                                   | Favours the intervention | Varies                                                 | Don't know          |
| Resources required                                                                                                                                                                                                                                                                                                                                                                                                                                                              | Large costs                                                                       | Moderate costs                  | Negligible costs or savings                                                                       | Moderate savings                                                                    | Large savings            | Varies                                                 | Don't know          |
| Certainty of evidence of required resources                                                                                                                                                                                                                                                                                                                                                                                                                                     | Very low                                                                          | Low                             | Moderate                                                                                          | High                                                                                |                          | No included studies                                    |                     |
| Cost effectiveness                                                                                                                                                                                                                                                                                                                                                                                                                                                              | Favours the comparison                                                            | Probably favours the comparison | Does not favour intervention or comparison                                                        | Probably favours the intervention                                                   | Favours the intervention | Varies                                                 | No included studies |
| Equity                                                                                                                                                                                                                                                                                                                                                                                                                                                                          | Reduced                                                                           | Probably reduced                | Probably no impact                                                                                | Probably increased                                                                  | Increased                | Varies                                                 | Don't know          |
| Acceptability                                                                                                                                                                                                                                                                                                                                                                                                                                                                   | No                                                                                | Probably no                     | Probably yes                                                                                      | Yes                                                                                 |                          | Varies                                                 | Don't know          |
| Feasibility                                                                                                                                                                                                                                                                                                                                                                                                                                                                     | No                                                                                | Probably no                     | Probably yes                                                                                      | Yes                                                                                 |                          | Varies                                                 | Don't know          |
| Recommendation and voting results                                                                                                                                                                                                                                                                                                                                                                                                                                               |                                                                                   |                                 |                                                                                                   |                                                                                     |                          |                                                        |                     |
| Strong recommendation for comparison over intervention                                                                                                                                                                                                                                                                                                                                                                                                                          | Conditional recommendation for comparison over intervention<br><b>1 vote (5%)</b> |                                 | Conditional recommendation for either the intervention or the comparison<br><b>14 votes (74%)</b> | Conditional recommendation for intervention over comparison<br><b>4 votes (21%)</b> |                          | Strong recommendation for intervention over comparison | No recommendation   |
| Panel comments                                                                                                                                                                                                                                                                                                                                                                                                                                                                  |                                                                                   |                                 |                                                                                                   |                                                                                     |                          |                                                        |                     |
| COT should be used however, if clinical judgement deems that HFT should be used for example to help with secretions then it should be considered in specific patients<br>Because many of the studies included heterogeneous patients, finally it is unclear whether HFNC is more effective than COT in some groups of patients (obese, high risk and/or patients undergoing cardiac or thoracic surgery)<br>Reducing escalation is the main argument, even with a low certainty |                                                                                   |                                 |                                                                                                   |                                                                                     |                          |                                                        |                     |

| Question 5: Should HFNC or NIV be used in postoperative patients at high risk of respiratory complications?                                                                                                                                                                                                                                            |                                                             |                                 |                                                                          |                                                             |                          |                                                        |                     |
|--------------------------------------------------------------------------------------------------------------------------------------------------------------------------------------------------------------------------------------------------------------------------------------------------------------------------------------------------------|-------------------------------------------------------------|---------------------------------|--------------------------------------------------------------------------|-------------------------------------------------------------|--------------------------|--------------------------------------------------------|---------------------|
| <b>Recommendation:</b><br>We suggest the use of either HFNC or NIV in postoperative patients at high risk of respiratory complications. (conditional recommendation, low certainty).                                                                                                                                                                   |                                                             |                                 |                                                                          |                                                             |                          |                                                        |                     |
| Desirable effects                                                                                                                                                                                                                                                                                                                                      | Trivial                                                     | Small                           | Moderate                                                                 | Large                                                       |                          | Varies                                                 | Unsure              |
| Undesirable effects                                                                                                                                                                                                                                                                                                                                    | Large                                                       | Moderate                        | Small                                                                    | Trivial                                                     |                          | Varies                                                 | Unsure              |
| Certainty of evidence of effects                                                                                                                                                                                                                                                                                                                       | Very low                                                    | Low                             | Moderate                                                                 | High                                                        |                          | No included studies                                    |                     |
| Variability in values                                                                                                                                                                                                                                                                                                                                  | Important uncertainty or variability                        |                                 | Possibly important uncertainty or variability                            | Probably no important uncertainty or variability            |                          | No important uncertainty or variability                |                     |
| Balance of effects                                                                                                                                                                                                                                                                                                                                     | Favours the comparison                                      | Probably favours the comparison | Does not favour intervention or comparison                               | Probably favours the intervention                           | Favours the intervention | Varies                                                 | Unsure              |
| Resources required                                                                                                                                                                                                                                                                                                                                     | Large costs                                                 | Moderate costs                  | Negligible costs or savings                                              | Moderate savings                                            | Large savings            | Varies                                                 | Unsure              |
| Certainty of evidence of required resources                                                                                                                                                                                                                                                                                                            | Very low                                                    | Low                             | Moderate                                                                 | High                                                        |                          | No included studies                                    |                     |
| Cost effectiveness                                                                                                                                                                                                                                                                                                                                     | Favours the comparison                                      | Probably favours the comparison | Does not favour intervention or comparison                               | Probably favours the intervention                           | Favours the intervention | Varies                                                 | No included studies |
| Equity                                                                                                                                                                                                                                                                                                                                                 | Reduced                                                     | Probably reduced                | Probably no impact                                                       | Probably increased                                          | Increased                | Varies                                                 | Unsure              |
| Acceptability                                                                                                                                                                                                                                                                                                                                          | No                                                          | Probably no                     | Probably yes                                                             | Yes                                                         |                          | Varies                                                 | Unsure              |
| Feasibility                                                                                                                                                                                                                                                                                                                                            | No                                                          | Probably no                     | Probably yes                                                             | Yes                                                         |                          | Varies                                                 | Unsure              |
| Recommendation and voting results                                                                                                                                                                                                                                                                                                                      |                                                             |                                 |                                                                          |                                                             |                          |                                                        |                     |
| Strong recommendation for comparison over intervention                                                                                                                                                                                                                                                                                                 | Conditional recommendation for comparison over intervention |                                 | Conditional recommendation for either the intervention or the comparison | Conditional recommendation for intervention over comparison |                          | Strong recommendation for intervention over comparison | No recommendation   |
|                                                                                                                                                                                                                                                                                                                                                        |                                                             |                                 | 17 votes (94%)                                                           | 1 vote (6%)                                                 |                          |                                                        |                     |
| Panel comments                                                                                                                                                                                                                                                                                                                                         |                                                             |                                 |                                                                          |                                                             |                          |                                                        |                     |
| The usage should be clinical led. if a patient has skin breakdown due to NIV, HFT should be considered<br>NIV may be more effective than HFNC in surgical patients at high risk of respiratory failure. A small number of trials have compared HFNC and NIV in post-operative patients.<br>HFNC for comfort and possibly cost. simpler to use than NIV |                                                             |                                 |                                                                          |                                                             |                          |                                                        |                     |

| Question 6: Should HFNC or COT be used in nonsurgical patients at low risk of extubation failure?                                                                                                                                                                        |                                                             |                                 |                                                                          |                                                             |                          |                                                        |                     |
|--------------------------------------------------------------------------------------------------------------------------------------------------------------------------------------------------------------------------------------------------------------------------|-------------------------------------------------------------|---------------------------------|--------------------------------------------------------------------------|-------------------------------------------------------------|--------------------------|--------------------------------------------------------|---------------------|
| <b>Recommendation:</b><br><i>We suggest the use of HFNC over COT in non-surgical patients after extubation at low or moderate risk of extubation failure (conditional recommendation, moderate certainty).</i>                                                           |                                                             |                                 |                                                                          |                                                             |                          |                                                        |                     |
| Desirable effects                                                                                                                                                                                                                                                        | Trivial                                                     | Small                           | Moderate                                                                 | Large                                                       |                          | Varies                                                 | Don't know          |
| Undesirable effects                                                                                                                                                                                                                                                      | Large                                                       | Moderate                        | Small                                                                    | Trivial                                                     |                          | Varies                                                 | Don't know          |
| Certainty of evidence of effects                                                                                                                                                                                                                                         | Very low                                                    | Low                             | Moderate                                                                 | High                                                        |                          | No included studies                                    |                     |
| Variability in values                                                                                                                                                                                                                                                    | Important uncertainty or variability                        |                                 | Possibly important uncertainty or variability                            | Probably no important uncertainty or variability            |                          | No important uncertainty or variability                |                     |
| Balance of effects                                                                                                                                                                                                                                                       | Favours the comparison                                      | Probably favours the comparison | Does not favour intervention or comparison                               | Probably favours the intervention                           | Favours the intervention | Varies                                                 | Don't know          |
| Resources required                                                                                                                                                                                                                                                       | Large costs                                                 | Moderate costs                  | Negligible costs or savings                                              | Moderate savings                                            | Large savings            | Varies                                                 | Don't know          |
| Certainty of evidence of required resources                                                                                                                                                                                                                              | Very low                                                    | Low                             | Moderate                                                                 | High                                                        |                          | No included studies                                    |                     |
| Cost effectiveness                                                                                                                                                                                                                                                       | Favours the comparison                                      | Probably favours the comparison | Does not favour intervention or comparison                               | Probably favours the intervention                           | Favours the intervention | Varies                                                 | No included studies |
| Equity                                                                                                                                                                                                                                                                   | Reduced                                                     | Probably reduced                | Probably no impact                                                       | Probably increased                                          | Increased                | Varies                                                 | Don't know          |
| Acceptability                                                                                                                                                                                                                                                            | No                                                          | Probably no                     | Probably yes                                                             | Yes                                                         |                          | Varies                                                 | Don't know          |
| Feasibility                                                                                                                                                                                                                                                              | No                                                          | Probably no                     | Probably yes                                                             | Yes                                                         |                          | Varies                                                 | Don't know          |
| Recommendation and voting results                                                                                                                                                                                                                                        |                                                             |                                 |                                                                          |                                                             |                          |                                                        |                     |
| Strong recommendation for comparison over intervention                                                                                                                                                                                                                   | Conditional recommendation for comparison over intervention |                                 | Conditional recommendation for either the intervention or the comparison | Conditional recommendation for intervention over comparison |                          | Strong recommendation for intervention over comparison | No recommendation   |
|                                                                                                                                                                                                                                                                          |                                                             |                                 | 3 votes (16%)                                                            | 13 votes (68%)                                              |                          | 3 votes (16%)                                          |                     |
| Panel comments                                                                                                                                                                                                                                                           |                                                             |                                 |                                                                          |                                                             |                          |                                                        |                     |
| Other studies reported potential benefits of NIV in these patients at high risk of reintubation.<br>The certainty of evidence for some outcomes is low or moderate, limited mainly by the imprecision and risk of bias of the included studies.<br>In high risk patients |                                                             |                                 |                                                                          |                                                             |                          |                                                        |                     |

| Question 7: Should HFNC or NIV be used in nonsurgical patients at high risk of extubation failure?                                                                                                                                              |                                                                                   |                                 |                                                                          |                                                             |                                                                           |                                         |                     |
|-------------------------------------------------------------------------------------------------------------------------------------------------------------------------------------------------------------------------------------------------|-----------------------------------------------------------------------------------|---------------------------------|--------------------------------------------------------------------------|-------------------------------------------------------------|---------------------------------------------------------------------------|-----------------------------------------|---------------------|
| <b>Recommendation:</b><br>We suggest the use of NIV over HFNC after extubation for patients at high risk of extubation failure unless there are relative or absolute contraindications to NIV (conditional recommendation, moderate certainty). |                                                                                   |                                 |                                                                          |                                                             |                                                                           |                                         |                     |
| Desirable effects                                                                                                                                                                                                                               | Trivial                                                                           | Small                           | Moderate                                                                 | Large                                                       |                                                                           | Varies                                  | Don't know          |
| Undesirable effects                                                                                                                                                                                                                             | Large                                                                             | Moderate                        | Small                                                                    | Trivial                                                     |                                                                           | Varies                                  | Don't know          |
| Certainty of evidence of effects                                                                                                                                                                                                                | Very low                                                                          | Low                             | Moderate                                                                 | High                                                        |                                                                           | No included studies                     |                     |
| Variability in values                                                                                                                                                                                                                           | Important uncertainty or variability                                              |                                 | Possibly important uncertainty or variability                            | Probably no important uncertainty or variability            |                                                                           | No important uncertainty or variability |                     |
| Balance of effects                                                                                                                                                                                                                              | Favours the comparison                                                            | Probably favours the comparison | Does not favour intervention or comparison                               | Probably favours the intervention                           | Favours the intervention                                                  | Varies                                  | Don't know          |
| Resources required                                                                                                                                                                                                                              | Large costs                                                                       | Moderate costs                  | Negligible costs or savings                                              | Moderate savings                                            | Large savings                                                             | Varies                                  | Don't know          |
| Certainty of evidence of required resources                                                                                                                                                                                                     | Very low                                                                          | Low                             | Moderate                                                                 | High                                                        |                                                                           | No included studies                     |                     |
| Cost effectiveness                                                                                                                                                                                                                              | Favours the comparison                                                            | Probably favours the comparison | Does not favour intervention or comparison                               | Probably favours the intervention                           | Favours the intervention                                                  | Varies                                  | No included studies |
| Equity                                                                                                                                                                                                                                          | Reduced                                                                           | Probably reduced                | Probably no impact                                                       | Probably increased                                          | Increased                                                                 | Varies                                  | Don't know          |
| Acceptability                                                                                                                                                                                                                                   | No                                                                                | Probably no                     | Probably yes                                                             | Yes                                                         |                                                                           | Varies                                  | Don't know          |
| Feasibility                                                                                                                                                                                                                                     | No                                                                                | Probably no                     | Probably yes                                                             | Yes                                                         |                                                                           | Varies                                  | Don't know          |
| Recommendation and voting results                                                                                                                                                                                                               |                                                                                   |                                 |                                                                          |                                                             |                                                                           |                                         |                     |
| Strong recommendation for comparison over intervention<br><br>3 votes (18%)                                                                                                                                                                     | Conditional recommendation for comparison over intervention<br><br>13 votes (76%) |                                 | Conditional recommendation for either the intervention or the comparison | Conditional recommendation for intervention over comparison | Strong recommendation for intervention over comparison<br><br>1 vote (6%) | No recommendation                       |                     |
| Panel comments                                                                                                                                                                                                                                  |                                                                                   |                                 |                                                                          |                                                             |                                                                           |                                         |                     |
|                                                                                                                                                                                                                                                 |                                                                                   |                                 |                                                                          |                                                             |                                                                           |                                         |                     |

| Question 8: Should HFNC or NIV be used in patients with hypercapnic respiratory failure due to COPD?                                                                                                                                                                                                                                                                                                                                                                                                                                                                                                                                                                                             |                                      |                                                                                   |                                            |                                                                          |                                                  |                                                             |                                         |                                                        |                   |
|--------------------------------------------------------------------------------------------------------------------------------------------------------------------------------------------------------------------------------------------------------------------------------------------------------------------------------------------------------------------------------------------------------------------------------------------------------------------------------------------------------------------------------------------------------------------------------------------------------------------------------------------------------------------------------------------------|--------------------------------------|-----------------------------------------------------------------------------------|--------------------------------------------|--------------------------------------------------------------------------|--------------------------------------------------|-------------------------------------------------------------|-----------------------------------------|--------------------------------------------------------|-------------------|
| <b>Recommendation:</b><br><i>We suggest a trial of NIV prior to use of HFNC in patients with COPD and acute hypercapnic respiratory failure (conditional recommendation, low certainty).</i>                                                                                                                                                                                                                                                                                                                                                                                                                                                                                                     |                                      |                                                                                   |                                            |                                                                          |                                                  |                                                             |                                         |                                                        |                   |
| Desirable effects                                                                                                                                                                                                                                                                                                                                                                                                                                                                                                                                                                                                                                                                                | Trivial                              |                                                                                   | Small                                      | Moderate                                                                 | Large                                            |                                                             | Varies                                  | Don't know                                             |                   |
| Undesirable effects                                                                                                                                                                                                                                                                                                                                                                                                                                                                                                                                                                                                                                                                              | Large                                |                                                                                   | Moderate                                   | Small                                                                    | Trivial                                          |                                                             | Varies                                  | Don't know                                             |                   |
| Certainty of evidence of effects                                                                                                                                                                                                                                                                                                                                                                                                                                                                                                                                                                                                                                                                 | Very low                             |                                                                                   | Low                                        | Moderate                                                                 | High                                             |                                                             | No included studies                     |                                                        |                   |
| Variability in values                                                                                                                                                                                                                                                                                                                                                                                                                                                                                                                                                                                                                                                                            | Important uncertainty or variability |                                                                                   |                                            | Possibly important uncertainty or variability                            | Probably no important uncertainty or variability |                                                             | No important uncertainty or variability |                                                        |                   |
| Balance of effects                                                                                                                                                                                                                                                                                                                                                                                                                                                                                                                                                                                                                                                                               | Favours the comparison               | Probably favours the comparison                                                   | Does not favour intervention or comparison |                                                                          | Probably favours the intervention                | Favours the intervention                                    | Varies                                  | Don't know                                             |                   |
| Resources required                                                                                                                                                                                                                                                                                                                                                                                                                                                                                                                                                                                                                                                                               | Large costs                          |                                                                                   | Moderate costs                             | Negligible costs or savings                                              |                                                  | Moderate savings                                            | Large savings                           | Varies                                                 | Don't know        |
| Certainty of evidence of required resources                                                                                                                                                                                                                                                                                                                                                                                                                                                                                                                                                                                                                                                      | Very low                             |                                                                                   | Low                                        | Moderate                                                                 | High                                             |                                                             | No included studies                     |                                                        |                   |
| Cost effectiveness                                                                                                                                                                                                                                                                                                                                                                                                                                                                                                                                                                                                                                                                               | Favours the comparison               | Probably favours the comparison                                                   | Does not favour intervention or comparison |                                                                          | Probably favours the intervention                | Favours the intervention                                    | Varies                                  | No included studies                                    |                   |
| Equity                                                                                                                                                                                                                                                                                                                                                                                                                                                                                                                                                                                                                                                                                           | Reduced                              |                                                                                   | Probably reduced                           | Probably no impact                                                       |                                                  | Probably increased                                          | Increased                               | Varies                                                 | Don't know        |
| Acceptability                                                                                                                                                                                                                                                                                                                                                                                                                                                                                                                                                                                                                                                                                    | No                                   |                                                                                   | Probably no                                | Probably yes                                                             |                                                  | Yes                                                         |                                         | Varies                                                 | Don't know        |
| Feasibility                                                                                                                                                                                                                                                                                                                                                                                                                                                                                                                                                                                                                                                                                      | No                                   |                                                                                   | Probably no                                | Probably yes                                                             |                                                  | Yes                                                         |                                         | Varies                                                 | Don't know        |
| Recommendation and voting results                                                                                                                                                                                                                                                                                                                                                                                                                                                                                                                                                                                                                                                                |                                      |                                                                                   |                                            |                                                                          |                                                  |                                                             |                                         |                                                        |                   |
| Strong recommendation for comparison over intervention<br><br>3 votes (19%)                                                                                                                                                                                                                                                                                                                                                                                                                                                                                                                                                                                                                      |                                      | Conditional recommendation for comparison over intervention<br><br>13 votes (81%) |                                            | Conditional recommendation for either the intervention or the comparison |                                                  | Conditional recommendation for intervention over comparison |                                         | Strong recommendation for intervention over comparison | No recommendation |
| Panel comments                                                                                                                                                                                                                                                                                                                                                                                                                                                                                                                                                                                                                                                                                   |                                      |                                                                                   |                                            |                                                                          |                                                  |                                                             |                                         |                                                        |                   |
| Studies comparing HFNC and NIV included small samples of patients and reported no actual benefits of HFNC<br>Definition of which type of Acute Hypercapnic respiratory failure is mandatory , A COPD patients has nothing to do with an hpercapnic Lenovo hypoxemic patiems or a hypercapnic neuromuscular patients<br>The certainty of evidence regarding the effects of HFNC vs. NIV in hypercapnic failure are very limited, but may be useful in less sick patients or those who cannot tolerate NIV<br>It might be worth modulating the strength of recommendation based on the severity of hypercapnic ARF (eg. severe hypercapnia in COPD, the recommendation should be stronger for NIV) |                                      |                                                                                   |                                            |                                                                          |                                                  |                                                             |                                         |                                                        |                   |
