# Supplementary material
Source: HighWire-hosted journal article supplement (https://erj.ersjournals.com/content/59/4/2101574)
Supplement: inline-supplementary-material-3 [file inline-supplementary-material-3.pdf]

## Supplement: PRISMA Flow Diagram

### ERS Guidelines: High flow nasal cannula in acute respiratory failure

#### Authors

Simon Oczkowski<sup>1,2,\*</sup>, Begüm Ergan<sup>3,\*</sup>, Lieuwe Bos<sup>4,5</sup>, Michelle Chatwin<sup>6</sup>, Miguel Ferrer<sup>7</sup>, Cesare Gregoretti<sup>8,9</sup>, Leo Heunks<sup>10</sup>, Jean-Pierre Frat<sup>11,12</sup>, Federico Longhini<sup>13</sup>, Stefano Nava<sup>14,15</sup>, Paolo Navalesi<sup>16,17</sup>, Aylin Ozsancak Ugurlu<sup>18</sup>, Lara Pisani<sup>14,15</sup>, Teresa Renda<sup>19</sup>, Arnaud W. Thille<sup>11,12</sup>, João Carlos Winck<sup>20</sup>, Wolfram Windisch<sup>21</sup>, Thomy Tonia<sup>22</sup>, Jeanette Boyd<sup>23</sup>, Giovanni Sotgiu<sup>24</sup>, Raffaele Scala<sup>25</sup>

#### \*co-first authors

#### Affiliations

1. Department of Medicine, Division of Critical Care, McMaster University, Hamilton, Ontario, Canada
2. Department of Health Research Methods, Evidence, and Impact, McMaster University, Hamilton, Ontario, Canada
3. Department of Pulmonary and Critical Care, Dokuz Eylul University School of Medicine, Izmir, Turkey
4. Department of Intensive Care & Laboratory of Experimental Intensive Care and Anesthesiology (LEICA), Amsterdam UMC, location Academic Medical Center, Amsterdam
5. Respiratory Medicine, Amsterdam UMC, location Academic Medical Center, Amsterdam, The Netherlands.
6. Academic and Clinical Department of Sleep and Breathing and NIHR Respiratory Biomedical Research Unit, Royal Brompton & Harefield NHS Foundation Trust, Sydney Street, London, UK.
7. Dept of Pneumology, Respiratory Institute, Hospital Clinic, IDIBAPS, University of Barcelona and CIBERES, Barcelona, Spain.
8. Department of Surgical, Oncological and Oral Science University of Palermo, Palermo, Italy.
9. G.Giglio Institute, Cefalu', Italy
10. Department of Intensive Care Medicine, Amsterdam UMC, Location VUmc, Amsterdam, The Netherlands
11. Centre Hospitalier Universitaire de Poitiers, Médecine Intensive Réanimation, Poitiers, France.
12. INSERM Centre d'Investigation Clinique 1402 ALIVE, Université de Poitiers, Poitiers, France.
13. Anesthesia and Intensive Care Unit, Department of Medical and Surgical Sciences, Magna Graecia University, Catanzaro, Italy
14. Alma Mater Studiorum University of Bologna, Dept of Clinical, Integrated and Experimental Medicine (DIMES), Bologna, Italy
15. IRCCS Azienda Ospedaliero-Universitaria di Bologna, University Hospital Sant'Orsola-Malpighi - Respiratory and Critical Care Unit, Bologna, Italy
16. Anesthesia and Intensive Care, Padua University Hospital, University Hospital, Padua, Italy
17. Department of Medicine -DIMED, University of Padua, Italy
18. Department of Pulmonary Medicine, Baskent University, Istanbul, Turkey.
19. Cardiothoracic and Vascular Department, Respiratory and Critical Care Unit, Careggi University Hospital, Largo Brambilla 3, 50134 Florence, Italy.
20. Faculdade de Medicina da Universidade do Porto, Portugal.
21. Cologne Merheim Hospital, Dept of Pneumology, Kliniken der Stadt Köln, gGmbH, Witten/Herdecke University, Faculty of Health/School of Medicine, Köln, Germany.
22. Institute of Social and Preventive Medicine, University of Bern, Switzerland
23. European Lung Foundation (ELF), Sheffield, United Kingdom
24. Clinical Epidemiology and Medical Statistics Unit, Department of Medical, Surgical, Experimental Sciences, University of Sassari, Sassari, Italy.
25. Pulmonology and Respiratory Intensive Care Unit, Cardio-Thoraco-Neuro-vascular and Metabolic Department, Usl Toscana Sudest, S Donato Hospital, Arezzo, Italy.

Supplementary Figure 1: PRISMA Diagram of Included Studies

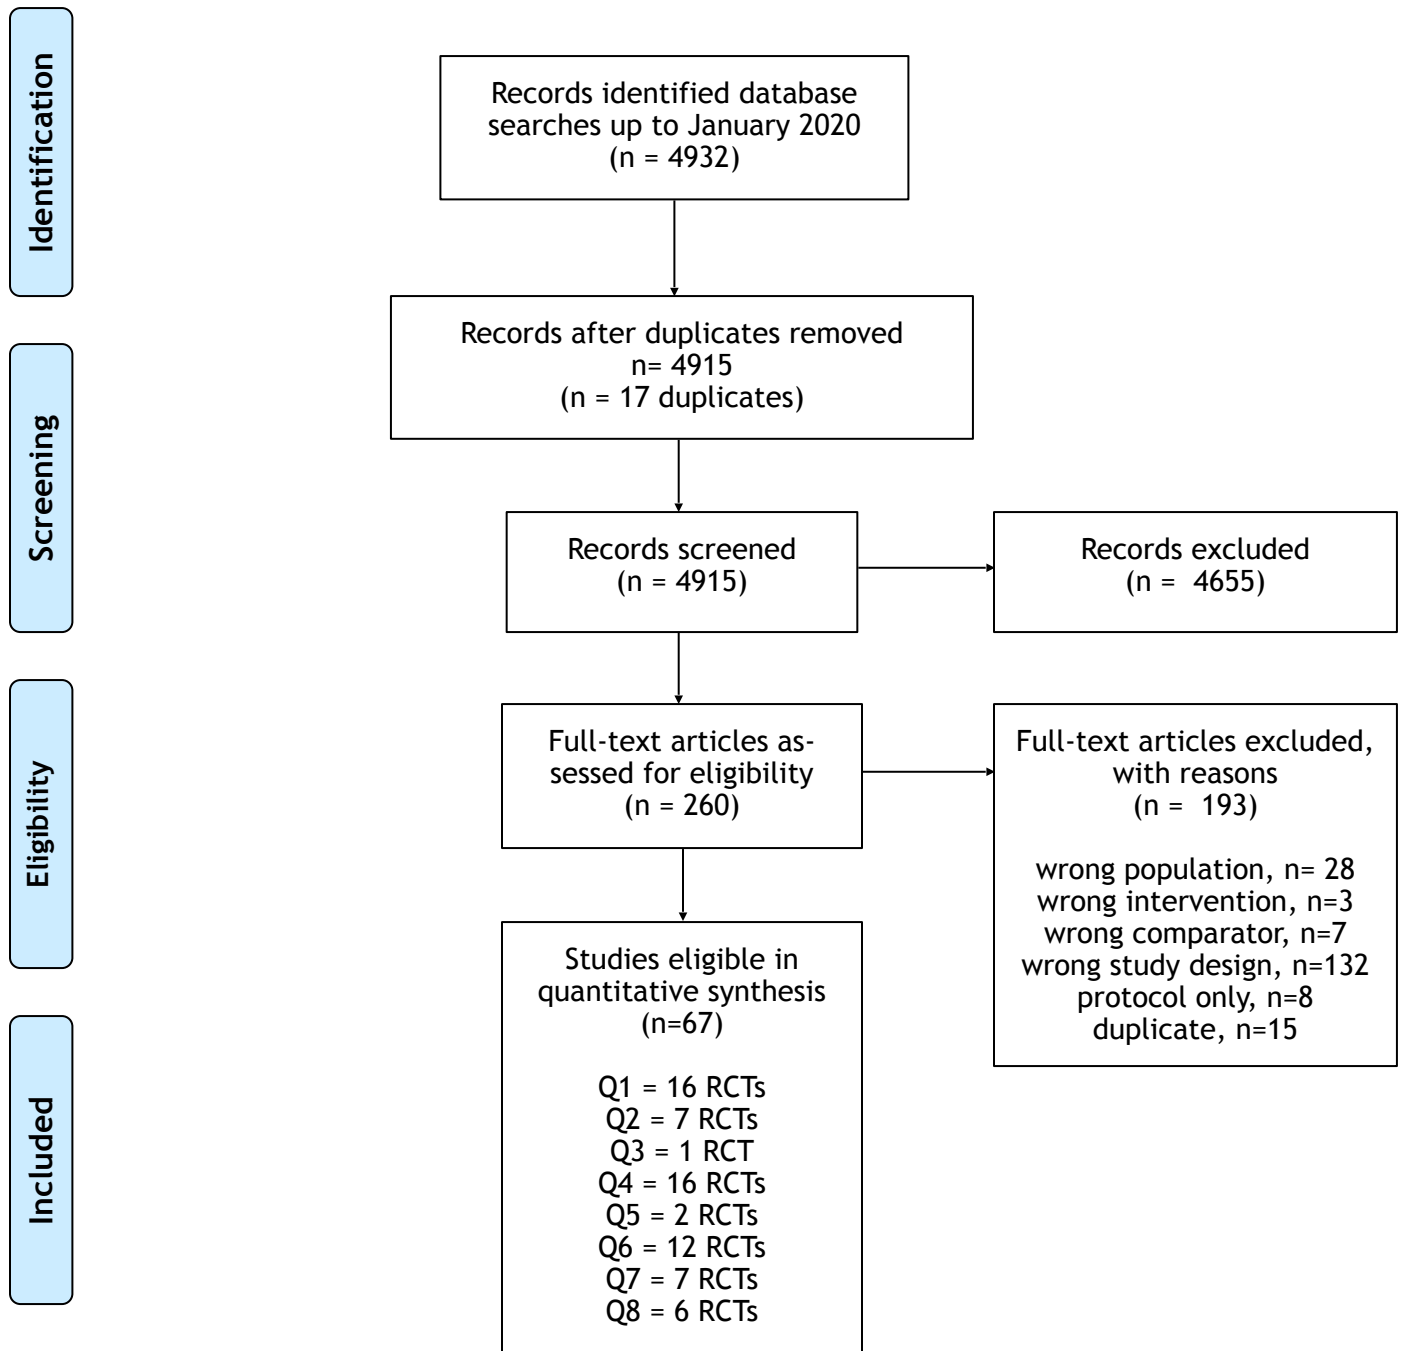

From: Moher D, Liberati A, Tetzlaff J, Altman DG, The PRISMA Group (2009). Preferred Reporting Items for Systematic Reviews and Meta-Analyses: The PRISMA Statement. PLoS Med 6(7): e1000097. doi:10.1371/journal.pmed1000097

For more information, visit [www.prisma-statement.org](http://www.prisma-statement.org).
